# Supplementary material for: Chiral bifunctional ferrocenylphosphine catalyzed highly enantioselective [3 + 2] cycloaddition reaction
Source: Royal Society of Chemistry journal article supplement (doi:10.1039/c5ob01958c), 2015-10-27
Supplement: c5ob01958c1.pdf [file c5ob01958c1.pdf]

Supplementary Information for:

**Chiral Bifunctional Ferrocenylphosphines Catalyzed the highly  
Enantioselective [3+2] Cycloaddition Reaction**

Haiwen Hu, Shuxian Yu, Linglong Zhu, Lingxiu Zhou and Weihui Zhong\*

Key Laboratory of Pharmaceutical Engineering of Ministry of Education, College of Pharmaceutical  
Sciences, Zhejiang University of Technology, Hangzhou 310014, P.R. China.

Tel.&Fax:+86(571)88320867 E-mail: weihuizhong@zjut.edu.cn

**Content**

|                                                             |                |
|-------------------------------------------------------------|----------------|
| <b>I. HPLC of the [3+2] cycloaddition products</b>          | <b>S2-S21</b>  |
| <b>II. NMR/MS Spectra of the catalysts and the products</b> | <b>S22-S60</b> |

# I. HPLC chromatogram of the [3+2] cycloaddition products

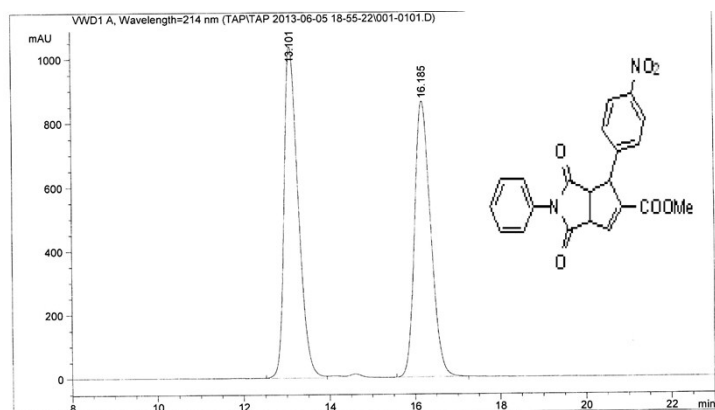

## Area Percent Report

Sorted By : Signal  
Multiplier: : 1.0000  
Dilution: : 1.0000  
Use Multiplier & Dilution Factor with ISTDs

Signal 1: VWD1 A, Wavelength=214 nm

| Peak # | RetTime [min] | Type | Width [min] | Area mAU*s | Height [mAU] | Area %  |
|--------|---------------|------|-------------|------------|--------------|---------|
| 1      | 13.101        | BV   | 0.3506      | 2.36655e4  | 1037.29126   | 50.8613 |
| 2      | 16.185        | BB   | 0.4110      | 2.28640e4  | 863.08838    | 49.1387 |

Totals : 4.65295e4 1900.37964

\*\*\* End of Report \*\*\*

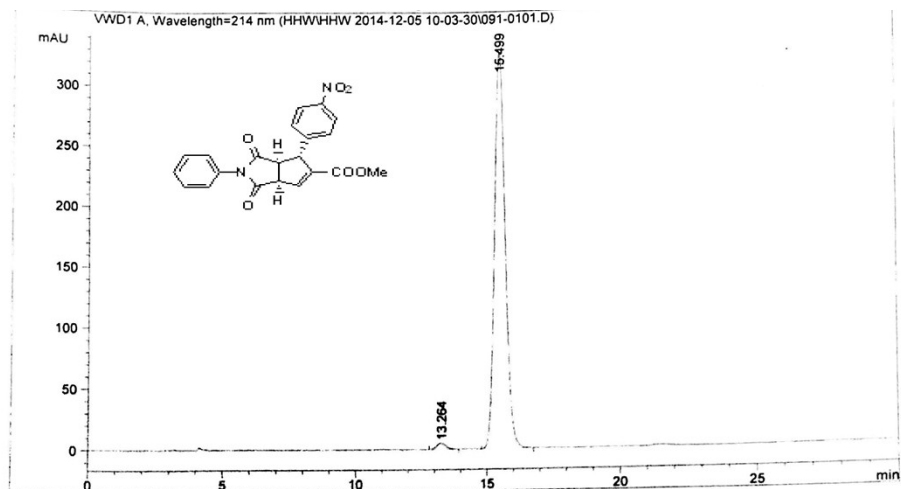

## Area Percent Report

Sorted By : Signal  
Multiplier: : 1.0000  
Dilution: : 1.0000  
Use Multiplier & Dilution Factor with ISTDs

Signal 1: VWD1 A, Wavelength=214 nm

| Peak # | RetTime [min] | Type | Width [min] | Area mAU*s | Height [mAU] | Area %  |
|--------|---------------|------|-------------|------------|--------------|---------|
| 1      | 13.264        | BB   | 0.3850      | 130.31323  | 5.23612      | 1.3971  |
| 2      | 15.499        | BB   | 0.4353      | 9197.28418 | 327.57498    | 98.6029 |

Totals : 9327.59741 332.81110

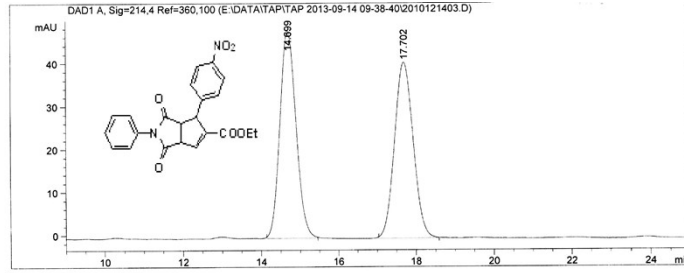

Area Percent Report

Sorted By : Signal  
Multiplier: : 1.0000  
Dilution: : 1.0000  
Use Multiplier & Dilution Factor with ISTDs

Signal 1: DAD1 A, Sig=214,4 Ref=360,100

| Peak # | RetTime [min] | Type | Width [min] | Area [mAU*s] | Height [mAU] | Area %  |
|--------|---------------|------|-------------|--------------|--------------|---------|
| 1      | 2.141         | BB   | 0.1301      | 14.90601     | 1.60843      | 0.4914  |
| 2      | 4.716         | BV   | 0.1769      | 14.26647     | 1.25253      | 0.4703  |
| 3      | 4.999         | VB   | 0.1474      | 11.03178     | 1.09664      | 0.3637  |
| 4      | 6.565         | BB   | 0.2076      | 47.74760     | 3.32418      | 1.5741  |
| 5      | 7.396         | BB   | 0.2308      | 199.64729    | 13.17628     | 6.5817  |
| 6      | 14.699        | BB   | 0.4454      | 1379.59326   | 48.28056     | 45.4805 |
| 7      | 17.702        | BB   | 0.5222      | 1366.18384   | 40.84678     | 45.0384 |

Totals : 3033.37626 109.58540

\*\*\* End of Report \*\*\*

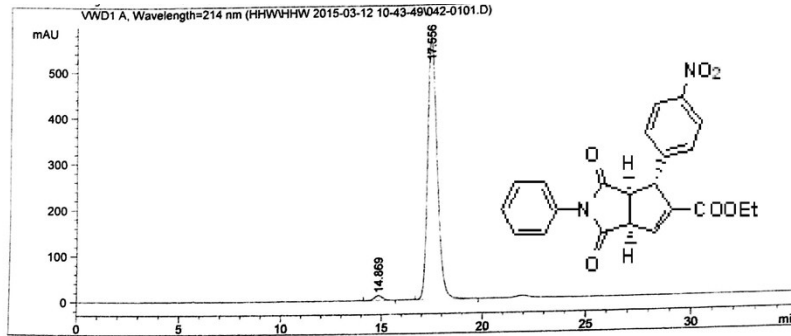

Area Percent Report

Sorted By : Signal  
Multiplier: : 1.0000  
Dilution: : 1.0000  
Use Multiplier & Dilution Factor with ISTDs

Signal 1: VWD1 A, Wavelength=214 nm

| Peak # | RetTime [min] | Type | Width [min] | Area mAU *s | Height [mAU] | Area %  |
|--------|---------------|------|-------------|-------------|--------------|---------|
| 1      | 14.869        | VB   | 0.4619      | 318.10962   | 10.48002     | 1.6798  |
| 2      | 17.556        | BB   | 0.5044      | 1.86188e4   | 568.45850    | 98.3202 |

Totals : 1.89369e4 578.93851

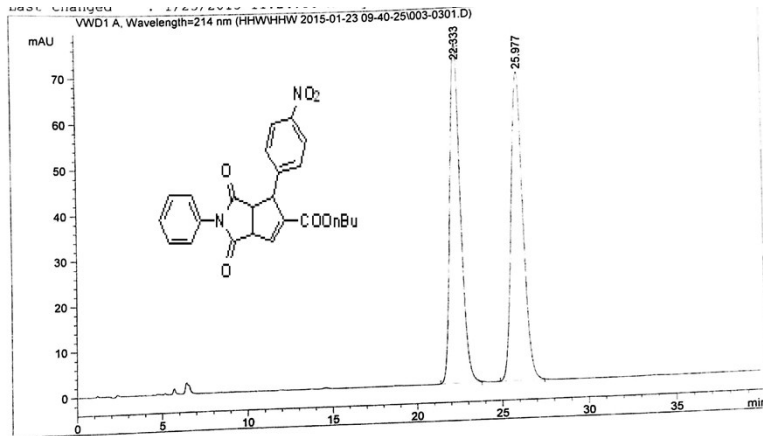

Area Percent Report

Sorted By : Signal  
Multiplier: : 1.0000  
Dilution: : 1.0000  
Use Multiplier & Dilution Factor with ISTDs

Signal 1: VWD1 A, Wavelength=214 nm

| Peak #   | RetTime [min] | Type | Width [min] | Area mAU *s | Height [mAU] | Area %  |
|----------|---------------|------|-------------|-------------|--------------|---------|
| 1        | 22.333        | BB   | 0.6680      | 3277.39307  | 75.72830     | 50.0216 |
| 2        | 25.977        | BB   | 0.7400      | 3274.55786  | 68.63902     | 49.9784 |
| Totals : |               |      |             | 6551.95093  | 144.36732    |         |

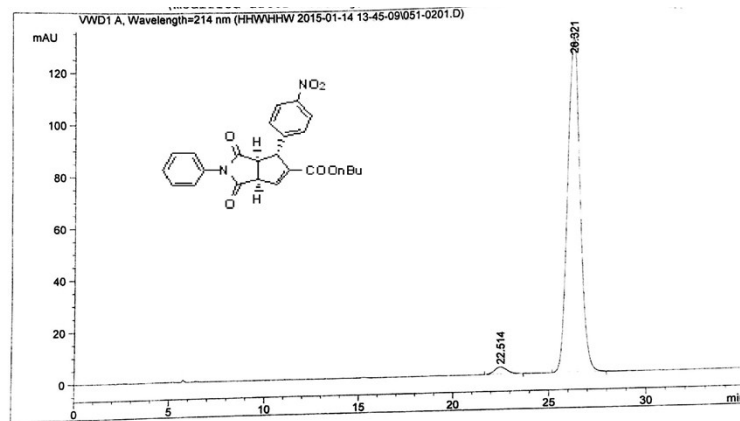

Area Percent Report

Sorted By : Signal  
Multiplier: : 1.0000  
Dilution: : 1.0000  
Use Multiplier & Dilution Factor with ISTDs

Signal 1: VWD1 A, Wavelength=214 nm

| Peak # | RetTime [min] | Type | Width [min] | Area mAU *s | Height [mAU] | Area %  |
|--------|---------------|------|-------------|-------------|--------------|---------|
| 1      | 22.514        | BB   | 0.6465      | 125.06725   | 2.74520      | 2.0992  |
| 2      | 26.321        | BB   | 0.6980      | 5832.67480  | 129.67511    | 97.9008 |

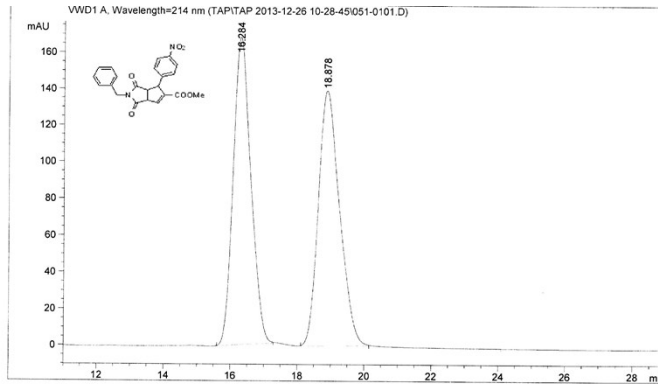

Area Percent Report

Sorted By : Signal  
Multiplier: : 1.0000  
Dilution: : 1.0000  
Use Multiplier & Dilution Factor with ISTDs

Signal 1: VWD1 A, Wavelength=214 nm

| Peak # | RetTime [min] | Type | Width [min] | Area mAU *s | Height [mAU] | Area %  |
|--------|---------------|------|-------------|-------------|--------------|---------|
| 1      | 16.284        | BB   | 0.5493      | 6142.51367  | 167.83238    | 50.0797 |
| 2      | 18.878        | BB   | 0.6563      | 6122.96191  | 139.08620    | 49.9203 |

Totals : 1.22655e4 306.91858

\*\*\* End of Report \*\*\*

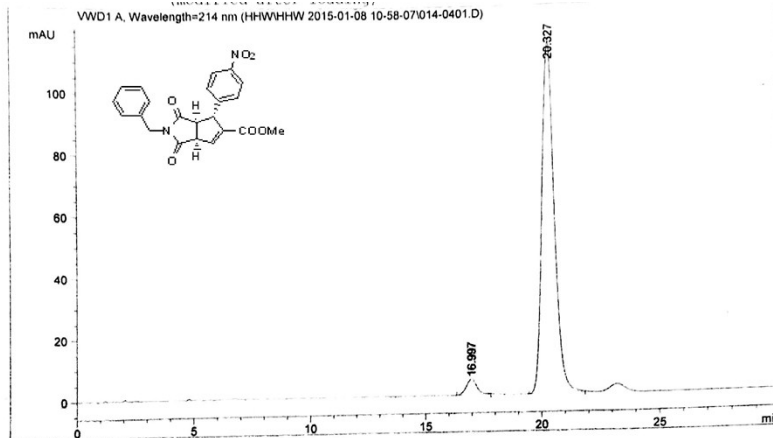

Area Percent Report

Sorted By : Signal  
Multiplier: : 1.0000  
Dilution: : 1.0000  
Use Multiplier & Dilution Factor with ISTDs

Signal 1: VWD1 A, Wavelength=214 nm

| Peak # | RetTime [min] | Type | Width [min] | Area mAU *s | Height [mAU] | Area %  |
|--------|---------------|------|-------------|-------------|--------------|---------|
| 1      | 16.997        | BB   | 0.4838      | 166.26436   | 5.21830      | 3.7825  |
| 2      | 20.327        | BB   | 0.5653      | 4229.39844  | 115.16264    | 96.2175 |

Totals : 4395.66280 120.38094

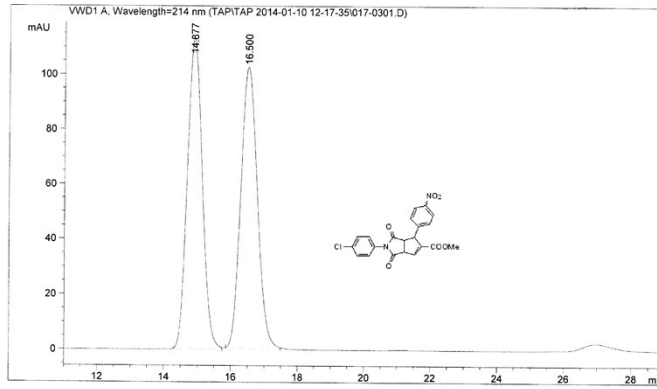

Area Percent Report

Sorted By : Signal  
Multiplier: : 1.0000  
Dilution: : 1.0000  
Use Multiplier & Dilution Factor with ISTDs

Signal 1: VWD1 A, Wavelength=214 nm

| Peak # | RetTime [min] | Type | Width [min] | Area mAU   | *s | Height [mAU] | Area %  |
|--------|---------------|------|-------------|------------|----|--------------|---------|
| 1      | 14.877        | BB   | 0.4856      | 3489.09985 |    | 112.96248    | 49.8434 |
| 2      | 16.500        | BB   | 0.5368      | 3511.01978 |    | 102.40843    | 50.1566 |

Totals : 7000.11963 215.37091

\*\*\* End of Report \*\*\*

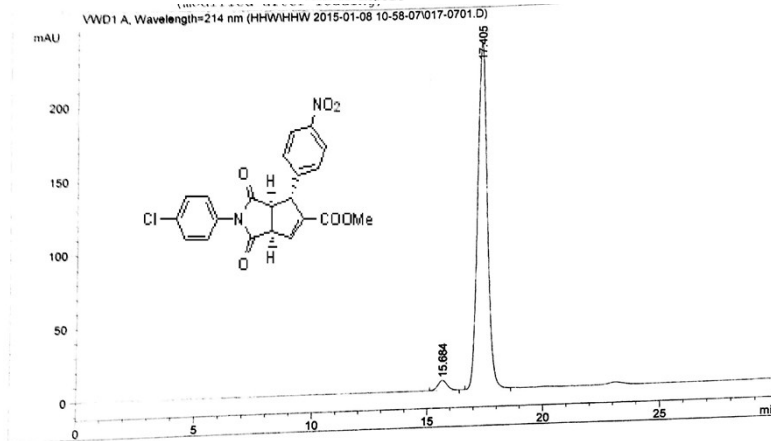

Area Percent Report

Sorted By : Signal  
Multiplier: : 1.0000  
Dilution: : 1.0000  
Use Multiplier & Dilution Factor with ISTDs

Signal 1: VWD1 A, Wavelength=214 nm

| Peak # | RetTime [min] | Type | Width [min] | Area mAU   | *s | Height [mAU] | Area %  |
|--------|---------------|------|-------------|------------|----|--------------|---------|
| 1      | 15.684        | BB   | 0.4212      | 193.08649  |    | 7.02253      | 2.6621  |
| 2      | 17.405        | BB   | 0.4551      | 7059.97705 |    | 240.16293    | 97.3379 |

Totals : 7253.06354 247.18546

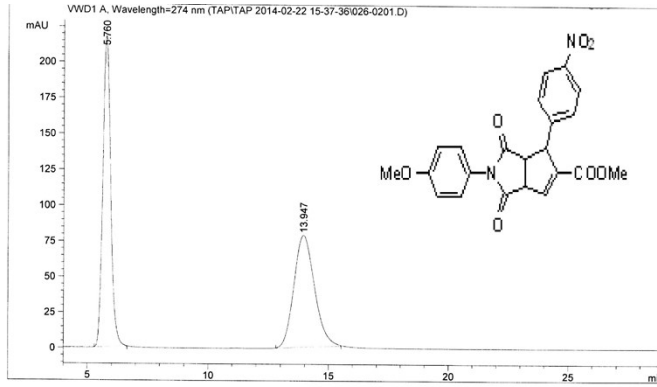

=====  
 Area Percent Report  
 =====

Sorted By : Signal  
 Multiplier: : 1.0000  
 Dilution: : 1.0000  
 Use Multiplier & Dilution Factor with ISTDs

Signal 1: VWD1 A, Wavelength=274 nm

| Peak # | RetTime [min] | Type | Width [min] | Area mAU*s | Height [mAU] | Area %  |
|--------|---------------|------|-------------|------------|--------------|---------|
| 1      | 5.760         | BB   | 0.3427      | 4872.44336 | 217.66606    | 50.8958 |
| 2      | 13.947        | BB   | 0.9198      | 4700.91943 | 78.67982     | 49.1042 |

Totals : 9573.36279 296.34588

=====  
 \*\*\* End of Report \*\*\*  
 =====

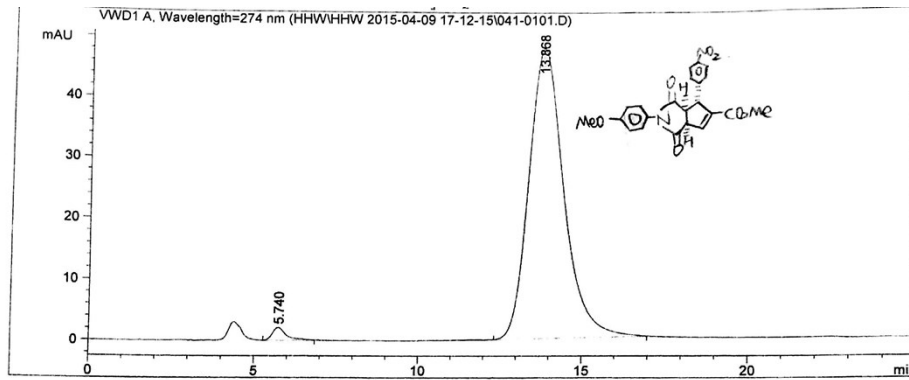

=====  
 Area Percent Report  
 =====

Sorted By : Signal  
 Multiplier: : 1.0000  
 Dilution: : 1.0000  
 Use Multiplier & Dilution Factor with ISTDs

Signal 1: VWD1 A, Wavelength=274 nm

| Peak # | RetTime [min] | Type | Width [min] | Area mAU*s | Height [mAU] | Area %  |
|--------|---------------|------|-------------|------------|--------------|---------|
| 1      | 5.740         | BB   | 0.4343      | 63.84350   | 2.12932      | 1.7397  |
| 2      | 13.868        | BB   | 1.1449      | 3605.88232 | 48.12646     | 98.2603 |

Totals : 3669.72582 50.25578

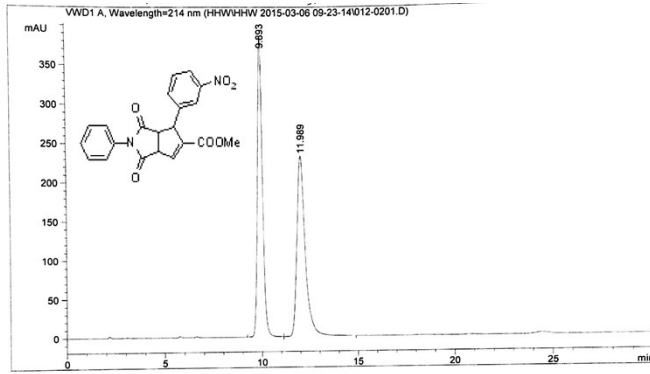

Area Percent Report

Sorted By : Signal  
Multiplier: : 1.0000  
Dilution: : 1.0000  
Use Multiplier & Dilution Factor with ISTDs

Signal 1: VWD1 A, Wavelength=214 nm

| Peak #   | RetTime [min] | Type | Width [min] | Area mAU*s | Height [mAU] | Area %  |
|----------|---------------|------|-------------|------------|--------------|---------|
| 1        | 9.893         | BV   | 0.2798      | 6983.59521 | 382.79703    | 49.7330 |
| 2        | 11.989        | VB   | 0.4514      | 7058.58643 | 233.68265    | 50.2670 |
| Totals : |               |      |             | 1.40422e4  | 616.47968    |         |

\*\*\* End of Report \*\*\*

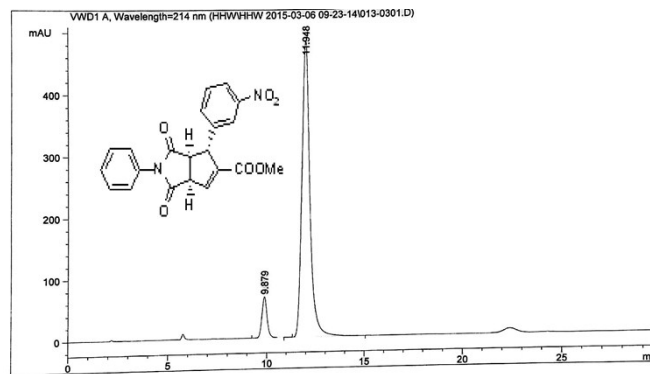

Area Percent Report

Sorted By : Signal  
Multiplier: : 1.0000  
Dilution: : 1.0000  
Use Multiplier & Dilution Factor with ISTDs

Signal 1: VWD1 A, Wavelength=214 nm

| Peak #   | RetTime [min] | Type | Width [min] | Area mAU*s | Height [mAU] | Area %  |
|----------|---------------|------|-------------|------------|--------------|---------|
| 1        | 9.879         | BB   | 0.2767      | 1216.43018 | 67.68273     | 8.0270  |
| 2        | 11.948        | BB   | 0.4340      | 1.39378e4  | 485.45142    | 91.9730 |
| Totals : |               |      |             | 1.51542e4  | 553.13415    |         |

\*\*\* End of Report \*\*\*



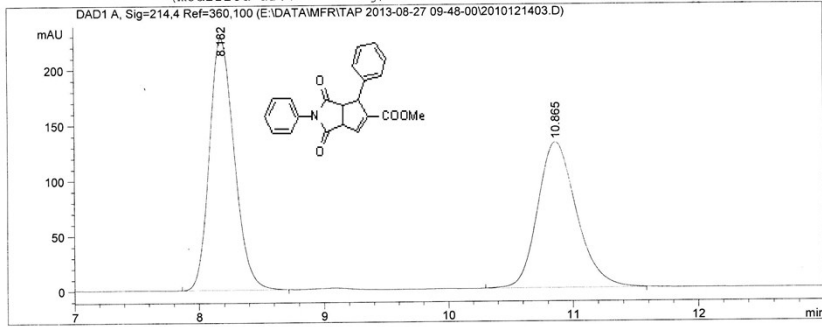

=====  
 Area Percent Report  
 =====

Sorted By : Signal  
 Multiplier: : 1.0000  
 Dilution: : 1.0000  
 Use Multiplier & Dilution Factor with ISTDs

Signal 1: DAD1 A, Sig=214,4 Ref=360,100

| Peak # | RetTime [min] | Type | Width [min] | Area [mAU*s] | Height [mAU] | Area %  |
|--------|---------------|------|-------------|--------------|--------------|---------|
| 1      | 8.182         | BB   | 0.2135      | 3149.83032   | 227.56776    | 52.6031 |
| 2      | 10.865        | BB   | 0.3305      | 2838.09131   | 132.19363    | 47.3969 |

Totals : 5987.92163 359.76140

=====  
 \*\*\* End of Report \*\*\*  
 =====

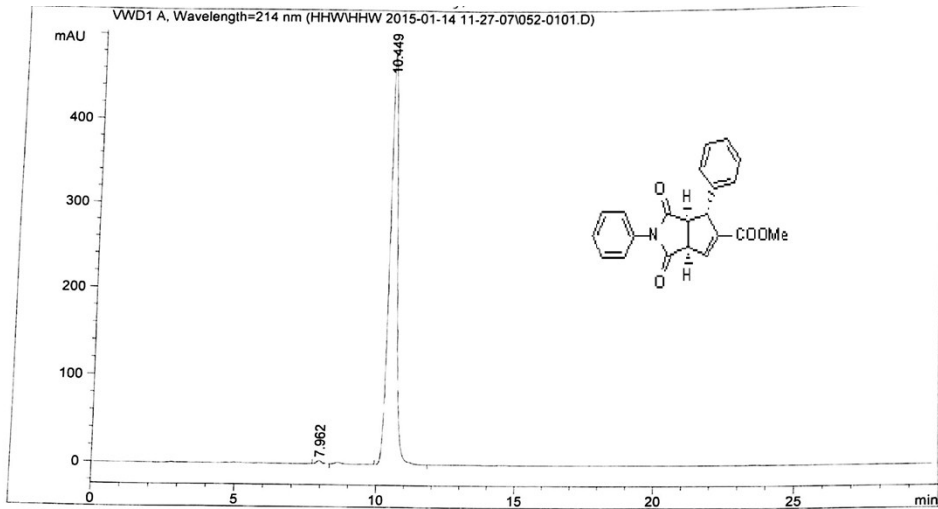

=====  
 Area Percent Report  
 =====

Sorted By : Signal  
 Multiplier: : 1.0000  
 Dilution: : 1.0000  
 Use Multiplier & Dilution Factor with ISTDs

Signal 1: VWD1 A, Wavelength=214 nm

| Peak # | RetTime [min] | Type | Width [min] | Area mAU*s | Height [mAU] | Area %  |
|--------|---------------|------|-------------|------------|--------------|---------|
| 1      | 7.962         | BB   | 0.1964      | 45.82819   | 3.60333      | 0.4875  |
| 2      | 10.449        | BB   | 0.2987      | 9354.30762 | 479.99799    | 99.5125 |

Totals : 9400.13580 483.60132

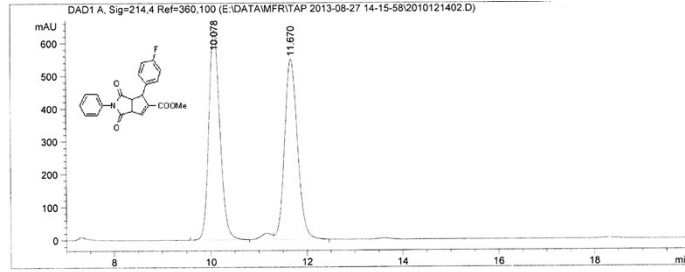

=====  
 Area Percent Report  
 =====

Sorted By : Signal  
 Multiplier: : 1.0000  
 Dilution: : 1.0000  
 Use Multiplier & Dilution Factor with ISTDs

Signal 1: DAD1 A, Sig=214,4 Ref=360,100

| Peak # | RetTime [min] | Type | Width [min] | Area [mAU*s] | Height [mAU] | Area %  |
|--------|---------------|------|-------------|--------------|--------------|---------|
| 1      | 10.078        | BB   | 0.2466      | 1.02153e4    | 638.70624    | 50.0120 |
| 2      | 11.670        | VB   | 0.2869      | 1.02104e4    | 549.32574    | 49.9880 |

Totals : 2.04257e4 1188.03198

=====  
 \*\*\* End of Report \*\*\*

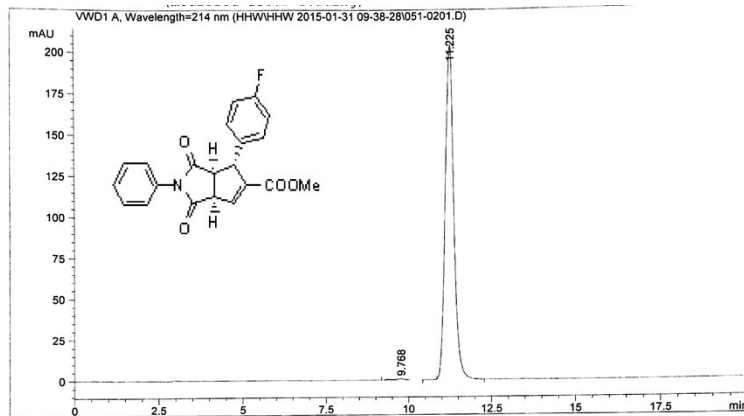

=====  
 Area Percent Report  
 =====

Sorted By : Signal  
 Multiplier: : 1.0000  
 Dilution: : 1.0000  
 Use Multiplier & Dilution Factor with ISTDs

Signal 1: VWD1 A, Wavelength=214 nm

| Peak # | RetTime [min] | Type | Width [min] | Area [mAU*s] | Height [mAU] | Area %  |
|--------|---------------|------|-------------|--------------|--------------|---------|
| 1      | 9.768         | BB   | 0.3192      | 18.14421     | 8.11136e-1   | 0.4876  |
| 2      | 11.225        | BB   | 0.2827      | 3702.71094   | 202.99611    | 99.5124 |

Totals : 3720.85515 203.80725

=====  
 \*\*\* End of Report \*\*\*

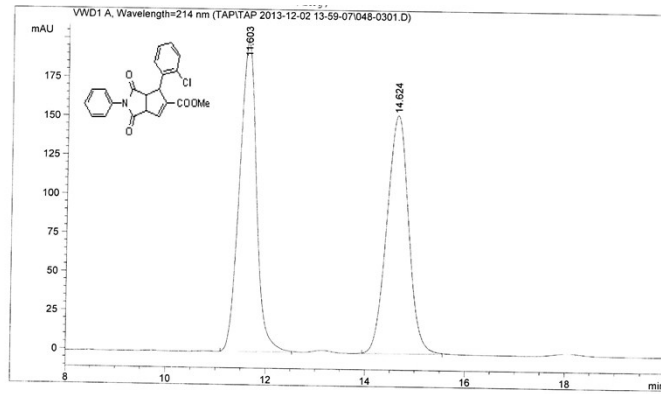

Area Percent Report

Sorted By : Signal  
Multiplier: : 1.0000  
Dilution: : 1.0000  
Use Multiplier & Dilution Factor with ISTDs

Signal 1: VWD1 A, Wavelength=214 nm

| Peak # | RetTime [min] | Type | Width [min] | Area [mAU*s] | Height [mAU] | Area %  |
|--------|---------------|------|-------------|--------------|--------------|---------|
| 1      | 11.603        | BB   | 0.3678      | 4714.86914   | 199.27615    | 50.1943 |
| 2      | 14.624        | BB   | 0.4762      | 4678.37207   | 152.96103    | 49.8057 |

Totals : 9393.24121 352.23718

\*\*\* End of Report \*\*\*

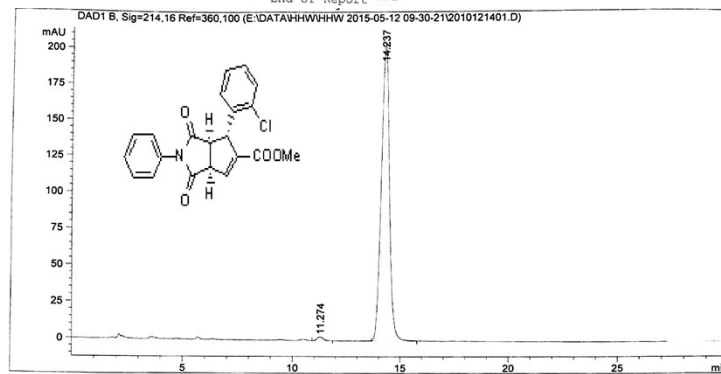

Area Percent Report

Sorted By : Signal  
Multiplier: : 1.0000  
Dilution: : 1.0000  
Use Multiplier & Dilution Factor with ISTDs

Signal 1: DAD1 B, Sig=214,16 Ref=360,100

| Peak # | RetTime [min] | Type | Width [min] | Area [mAU*s] | Height [mAU] | Area %  |
|--------|---------------|------|-------------|--------------|--------------|---------|
| 1      | 11.274        | VB   | 0.3119      | 53.16908     | 2.67454      | 0.9766  |
| 2      | 14.237        | BB   | 0.4031      | 5390.86084   | 204.77643    | 99.0234 |

Totals : 5444.02991 207.45096

\*\*\* End of Report \*\*\*

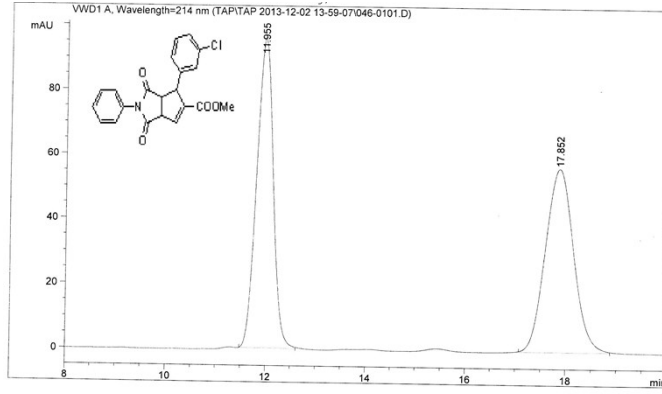

Area Percent Report

Sorted By : Signal  
Multiplier: : 1.0000  
Dilution: : 1.0000  
Use Multiplier & Dilution Factor with ISTDs

Signal 1: VWD1 A, Wavelength=214 nm

| Peak # | RetTime [min] | Type | Width [min] | Area mAU*s | Height [mAU] | Area %  |
|--------|---------------|------|-------------|------------|--------------|---------|
| 1      | 11.955        | BB   | 0.3605      | 2192.09692 | 95.66399     | 49.9527 |
| 2      | 17.852        | BB   | 0.6084      | 2196.24585 | 56.42459     | 50.0473 |

Totals : 4388.34277 152.08858

\*\*\* End of Report \*\*\*

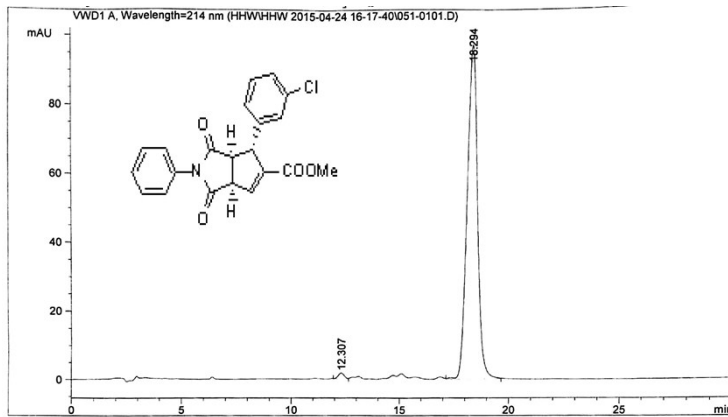

Area Percent Report

Sorted By : Signal  
Multiplier: : 1.0000  
Dilution: : 1.0000  
Use Multiplier & Dilution Factor with ISTDs

Signal 1: VWD1 A, Wavelength=214 nm

| Peak # | RetTime [min] | Type | Width [min] | Area mAU*s | Height [mAU] | Area %  |
|--------|---------------|------|-------------|------------|--------------|---------|
| 1      | 12.307        | BV   | 0.3042      | 34.33590   | 1.77621      | 1.0596  |
| 2      | 18.294        | VB   | 0.5112      | 3206.21851 | 96.91724     | 98.9404 |

Totals : 3240.55441 98.69344

\*\*\* End of Report \*\*\*

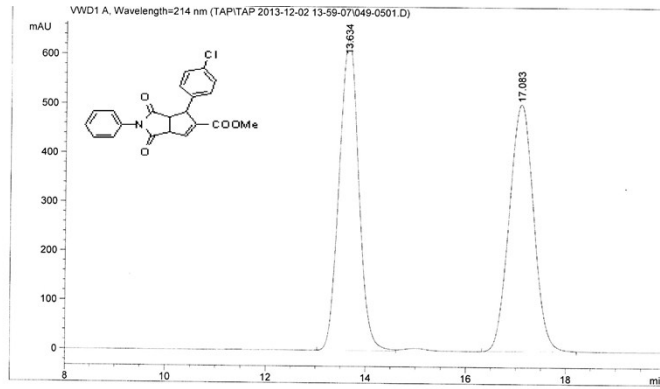

Area Percent Report

Sorted By : Signal  
Multiplier: : 1.0000  
Dilution: : 1.0000  
Use Multiplier & Dilution Factor with ISTDs

Signal 1: VWD1 A, Wavelength=214 nm

| Peak # | RetTime [min] | Type | Width [min] | Area mAU *s | Height [mAU] | Area %  |
|--------|---------------|------|-------------|-------------|--------------|---------|
| 1      | 13.634        | BB   | 0.4233      | 1.71187e4   | 632.81403    | 50.0954 |
| 2      | 17.083        | BB   | 0.5328      | 1.70535e4   | 502.47000    | 49.9046 |

Totals : 3.41722e4 1135.28403

\*\*\* End of Report \*\*\*

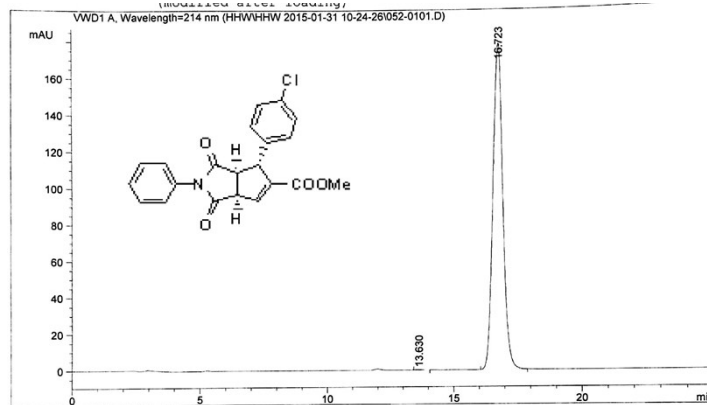

Area Percent Report

Sorted By : Signal  
Multiplier: : 1.0000  
Dilution: : 1.0000  
Use Multiplier & Dilution Factor with ISTDs

Signal 1: VWD1 A, Wavelength=214 nm

| Peak # | RetTime [min] | Type | Width [min] | Area mAU *s | Height [mAU] | Area %  |
|--------|---------------|------|-------------|-------------|--------------|---------|
| 1      | 13.630        | BB   | 0.2474      | 3.76061     | 2.09412e-1   | 0.0777  |
| 2      | 16.723        | BB   | 0.4174      | 4834.52930  | 178.81114    | 99.9223 |

Totals : 4838.28991 179.02055

\*\*\* End of Report \*\*\*

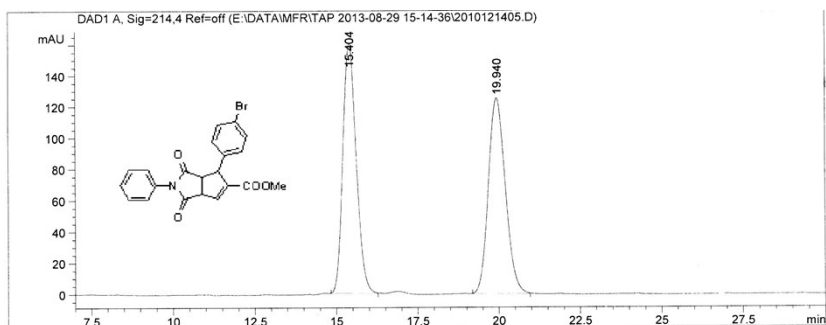

=====  
 Area Percent Report  
 =====

Sorted By : Signal  
 Multiplier: : 1.0000  
 Dilution: : 1.0000  
 Use Multiplier & Dilution Factor with ISTDs

Signal 1: DAD1 A, Sig=214,4 Ref=off

| Peak # | RetTime [min] | Type | Width [min] | Area [mAU*s] | Height [mAU] | Area %  |
|--------|---------------|------|-------------|--------------|--------------|---------|
| 1      | 15.404        | BB   | 0.4395      | 4529.70801   | 160.37756    | 49.8197 |
| 2      | 19.940        | BB   | 0.5675      | 4562.49561   | 125.09035    | 50.1803 |

Totals : 9092.20361 285.46792

=====  
 \*\*\* End of Report \*\*\*

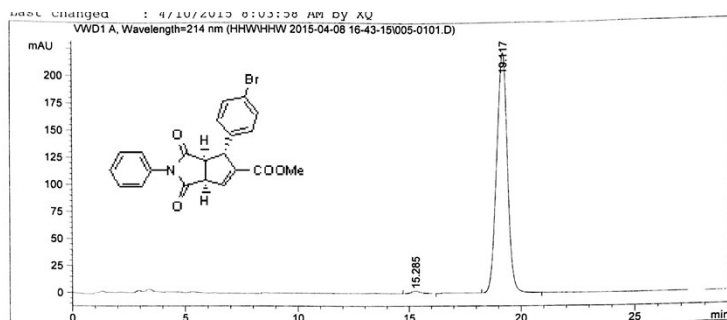

=====  
 Area Percent Report  
 =====

Sorted By : Signal  
 Multiplier: : 1.0000  
 Dilution: : 1.0000  
 Use Multiplier & Dilution Factor with ISTDs

Signal 1: WVD1 A, Wavelength=214 nm

| Peak # | RetTime [min] | Type | Width [min] | Area mAU*s | Height [mAU] | Area %  |
|--------|---------------|------|-------------|------------|--------------|---------|
| 1      | 15.285        | BB   | 0.4828      | 66.75794   | 2.10963      | 0.8943  |
| 2      | 19.117        | BB   | 0.5181      | 7397.72363 | 221.33163    | 99.1057 |

Totals : 7464.48158 223.44126

=====  
 \*\*\* End of Report \*\*\*

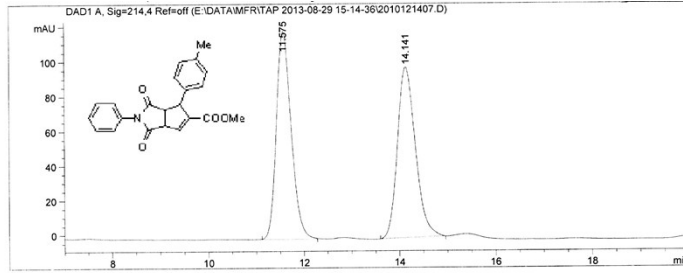

Area Percent Report

Sorted By : Signal  
Multiplier: : 1.0000  
Dilution: : 1.0000  
Use Multiplier & Dilution Factor with ISTDs

Signal 1: DAD1 A, Sig=214.4 Ref=off

| Peak # | RetTime [min] | Type | Width [min] | Area [mAU*s] | Height [mAU] | Area %  |
|--------|---------------|------|-------------|--------------|--------------|---------|
| 1      | 11.575        | BB   | 0.3321      | 2585.47217   | 119.65311    | 50.1126 |
| 2      | 14.141        | BB   | 0.4030      | 2573.84839   | 98.46755     | 49.8874 |

Totals : 5159.32056 218.12067

\*\*\* End of Report \*\*\*

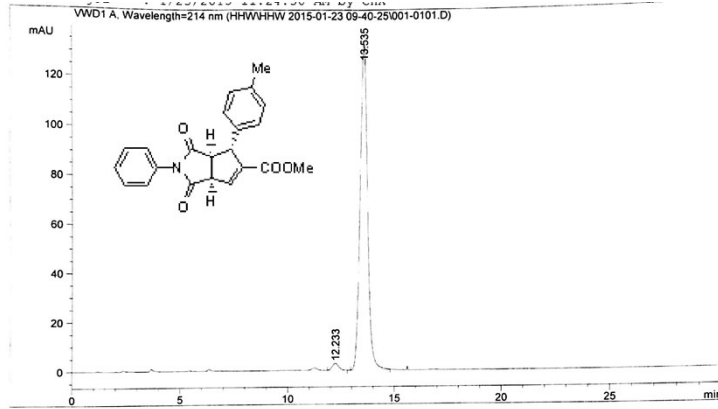

Area Percent Report

Sorted By : Signal  
Multiplier: : 1.0000  
Dilution: : 1.0000  
Use Multiplier & Dilution Factor with ISTDs

Signal 1: VWD1 A, Wavelength=214 nm

| Peak # | RetTime [min] | Type | Width [min] | Area mAU*s | Height [mAU] | Area %  |
|--------|---------------|------|-------------|------------|--------------|---------|
| 1      | 12.233        | BB   | 0.3230      | 59.61591   | 2.81290      | 1.8063  |
| 2      | 13.535        | BB   | 0.3752      | 3240.87671 | 132.70505    | 98.1937 |

Totals : 3300.49261 135.51795

\*\*\* End of Report \*\*\*

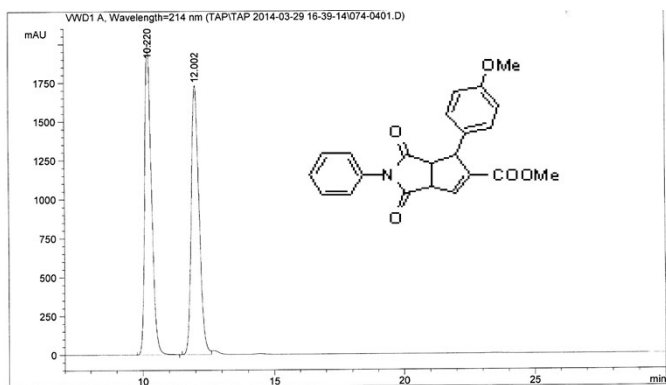

Area Percent Report

Sorted By : Signal  
Multiplier: : 1.0000  
Dilution: : 1.0000  
Use Multiplier & Dilution Factor with ISTDs

Signal 1: VWD1 A, Wavelength=214 nm

| Peak #   | RetTime [min] | Type | Width [min] | Area mAU *s | Height [mAU] | Area %  |
|----------|---------------|------|-------------|-------------|--------------|---------|
| 1        | 10.220        | BB   | 0.2764      | 3.57180e4   | 2003.82874   | 49.8687 |
| 2        | 12.002        | BV   | 0.3221      | 3.59204e4   | 1731.21252   | 50.1413 |
| Totals : |               |      |             | 7.16384e4   | 3735.04126   |         |

\*\*\* End of Report \*\*\*

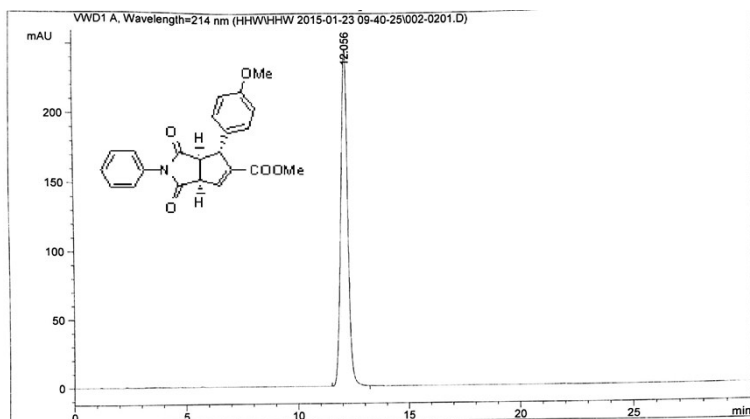

Area Percent Report

Sorted By : Signal  
Multiplier: : 1.0000  
Dilution: : 1.0000  
Use Multiplier & Dilution Factor with ISTDs

Signal 1: VWD1 A, Wavelength=214 nm

| Peak #   | RetTime [min] | Type | Width [min] | Area mAU *s | Height [mAU] | Area %   |
|----------|---------------|------|-------------|-------------|--------------|----------|
| 1        | 12.056        | BB   | 0.3355      | 5381.02441  | 247.21468    | 100.0000 |
| Totals : |               |      |             | 5381.02441  | 247.21468    |          |

\*\*\* End of Report \*\*\*



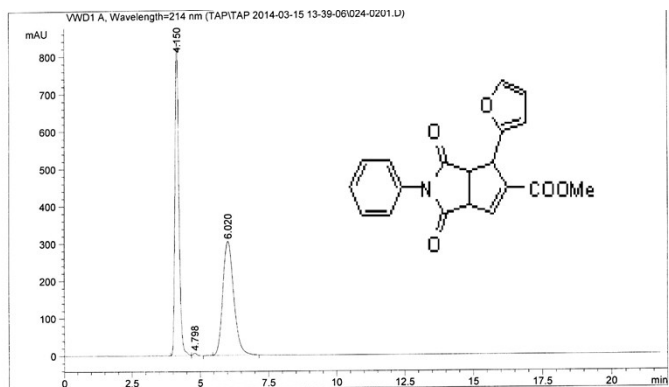

=====  
 Area Percent Report  
 =====

Sorted By : Signal  
 Multiplier: : 1.0000  
 Dilution: : 1.0000  
 Use Multiplier & Dilution Factor with ISTDs

Signal 1: VWD1 A, Wavelength=214 nm

| Peak # | RetTime [min] | Type | Width [min] | Area mAU*s | Height [mAU] | Area %  |
|--------|---------------|------|-------------|------------|--------------|---------|
| 1      | 4.150         | BV   | 0.1548      | 8462.98535 | 834.18024    | 49.9862 |
| 2      | 4.798         | VB   | 0.1419      | 58.83668   | 6.41843      | 0.3475  |
| 3      | 6.020         | BB   | 0.4284      | 8408.82617 | 303.14957    | 49.6663 |

Totals : 1.69306e4 1143.74824

=====  
 \*\*\* End of Report \*\*\*

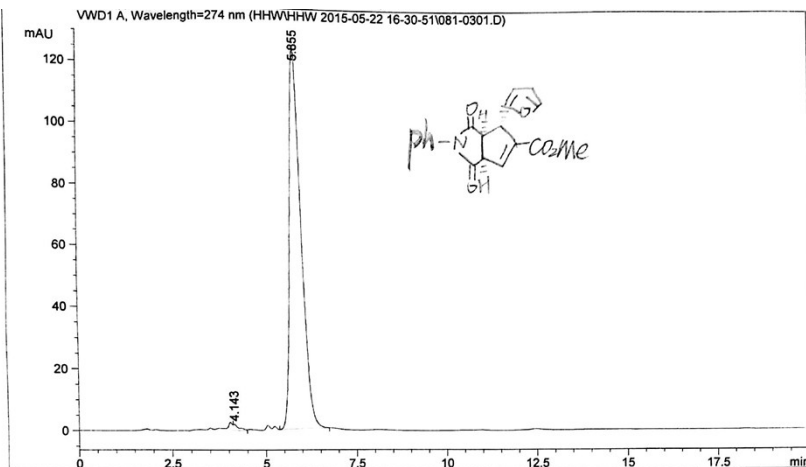

=====  
 Area Percent Report  
 =====

Sorted By : Signal  
 Multiplier: : 1.0000  
 Dilution: : 1.0000  
 Use Multiplier & Dilution Factor with ISTDs

Signal 1: VWD1 A, Wavelength=274 nm

| Peak # | RetTime [min] | Type | Width [min] | Area mAU*s | Height [mAU] | Area %  |
|--------|---------------|------|-------------|------------|--------------|---------|
| 1      | 4.143         | VB   | 0.1468      | 21.63298   | 2.01993      | 0.7960  |
| 2      | 5.855         | VB   | 0.3351      | 2696.01855 | 123.31822    | 99.2040 |

Totals : 2717.65153 125.33815

=====  
 \*\*\* End of Report \*\*\*

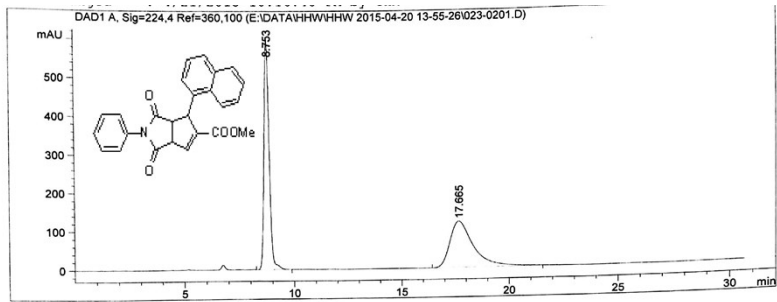

=====  
 Area Percent Report  
 =====

Sorted By : Signal  
 Multiplier: : 1.0000  
 Dilution: : 1.0000  
 Use Multiplier & Dilution Factor with ISTDs

Signal 1: DAD1 A, Sig=224,4 Ref=360,100

| Peak # | RetTime [min] | Type | Width [min] | Area [mAU*s] | Height [mAU] | Area %  |
|--------|---------------|------|-------------|--------------|--------------|---------|
| 1      | 8.753         | VB   | 0.2529      | 9753.52832   | 596.07275    | 51.2286 |
| 2      | 17.665        | BB   | 1.1328      | 9285.68555   | 121.88516    | 48.7714 |

Totals : 1.90392e4 717.95792

=====  
 \*\*\* End of Report \*\*\*

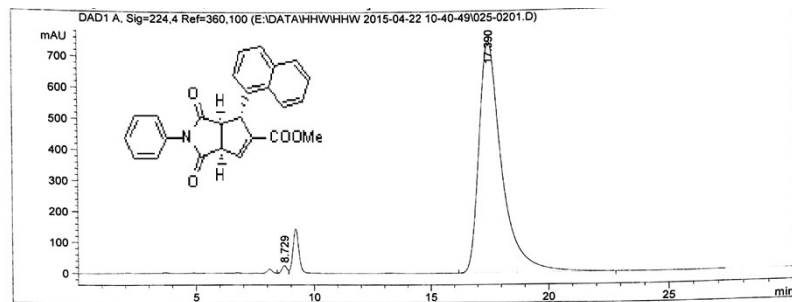

=====  
 Area Percent Report  
 =====

Sorted By : Signal  
 Multiplier: : 1.0000  
 Dilution: : 1.0000  
 Use Multiplier & Dilution Factor with ISTDs

Signal 1: DAD1 A, Sig=224,4 Ref=360,100

| Peak # | RetTime [min] | Type | Width [min] | Area [mAU*s] | Height [mAU] | Area %  |
|--------|---------------|------|-------------|--------------|--------------|---------|
| 1      | 8.729         | VV   | 0.2308      | 377.05472    | 25.17243     | 0.7412  |
| 2      | 17.390        | BB   | 1.0048      | 5.04925e4    | 746.81250    | 99.2588 |

Totals : 5.08696e4 771.98493

=====  
 \*\*\* End of Report \*\*\*

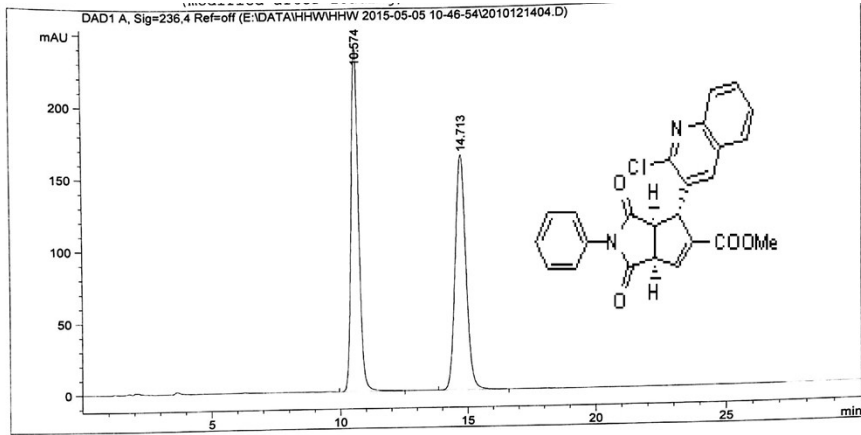

=====  
 Area Percent Report  
 =====

Sorted By : Signal  
 Multiplier: : 1.0000  
 Dilution: : 1.0000  
 Use Multiplier & Dilution Factor with ISTDs

Signal 1: DAD1 A, Sig=236,4 Ref=off

| Peak # | RetTime [min] | Type | Width [min] | Area [mAU*s] | Height [mAU] | Area %  |
|--------|---------------|------|-------------|--------------|--------------|---------|
| 1      | 10.574        | VV   | 0.3119      | 4887.16650   | 241.66545    | 49.9898 |
| 2      | 14.713        | VV   | 0.4569      | 4889.16992   | 165.35890    | 50.0102 |

Totals : 9776.33643 407.02435

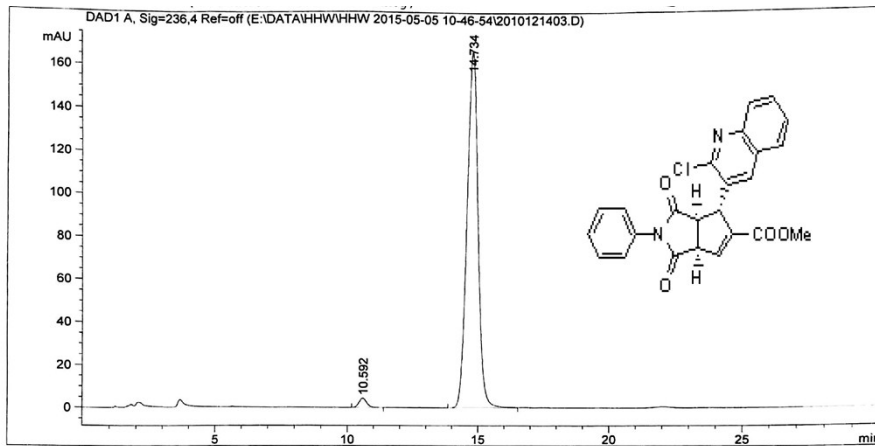

=====  
 Area Percent Report  
 =====

Sorted By : Signal  
 Multiplier: : 1.0000  
 Dilution: : 1.0000  
 Use Multiplier & Dilution Factor with ISTDs

Signal 1: DAD1 A, Sig=236,4 Ref=off

| Peak # | RetTime [min] | Type | Width [min] | Area [mAU*s] | Height [mAU] | Area %  |
|--------|---------------|------|-------------|--------------|--------------|---------|
| 1      | 10.592        | VV   | 0.3251      | 91.70045     | 4.43735      | 1.8372  |
| 2      | 14.734        | VV   | 0.4553      | 4899.69922   | 166.51833    | 98.1628 |

Totals : 4991.39967 170.95567

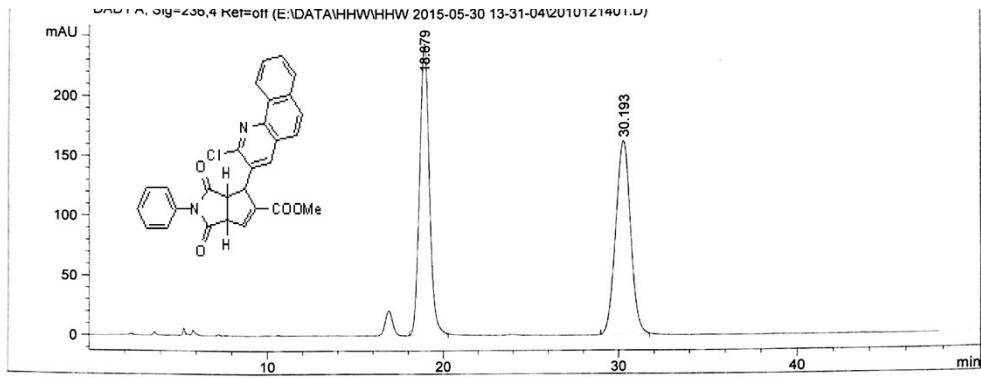

=====  
 Area Percent Report  
 =====

Sorted By : Signal  
 Multiplier: : 1.0000  
 Dilution: : 1.0000  
 Use Multiplier & Dilution Factor with ISTDs

Signal 1: DAD1 A, Sig=236,4 Ref=off

| Peak # | RetTime [min] | Type | Width [min] | Area [mAU*s] | Height [mAU] | Area %  |
|--------|---------------|------|-------------|--------------|--------------|---------|
| 1      | 18.879        | BB   | 0.5933      | 9482.30859   | 246.20564    | 50.0465 |
| 2      | 30.193        | BB   | 0.9074      | 9464.70020   | 162.53740    | 49.9535 |

Totals : 1.89470e4 408.74304

=====  
 \*\*\* End of Report \*\*\*

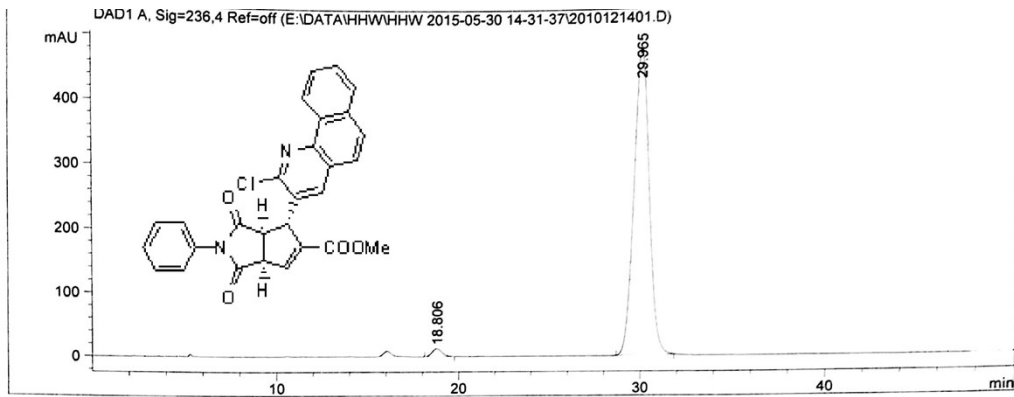

=====  
 Area Percent Report  
 =====

Sorted By : Signal  
 Multiplier: : 1.0000  
 Dilution: : 1.0000  
 Use Multiplier & Dilution Factor with ISTDs

Signal 1: DAD1 A, Sig=236,4 Ref=off

| Peak # | RetTime [min] | Type | Width [min] | Area [mAU*s] | Height [mAU] | Area %  |
|--------|---------------|------|-------------|--------------|--------------|---------|
| 1      | 18.806        | BB   | 0.5649      | 472.40665    | 12.55786     | 1.6739  |
| 2      | 29.965        | BB   | 0.8964      | 2.77489e4    | 480.02356    | 98.3261 |

Totals : 2.82213e4 492.58142

=====  
 \*\*\* End of Report \*\*\*

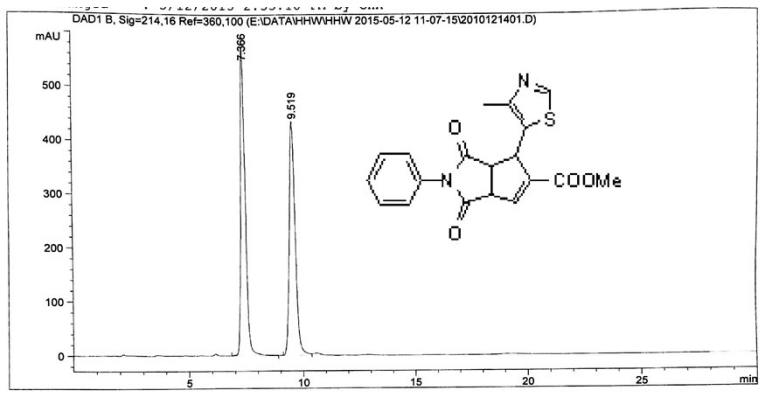

Area Percent Report

Sorted By : Signal  
Multiplier: : 1.0000  
Dilution: : 1.0000  
Use Multiplier & Dilution Factor with ISTDs

Signal 1: DAD1 B, Sig=214,16 Ref=360,100

| Peak # | RetTime [min] | Type | Width [min] | Area [mAU*s] | Height [mAU] | Area %  |
|--------|---------------|------|-------------|--------------|--------------|---------|
| 1      | 7.366         | BB   | 0.2235      | 8193.29297   | 570.79108    | 50.4830 |
| 2      | 9.519         | BV   | 0.2779      | 8036.51709   | 438.24078    | 49.5170 |

Totals : 1.62298e4 1009.03186

\*\*\* End of Report \*\*\*

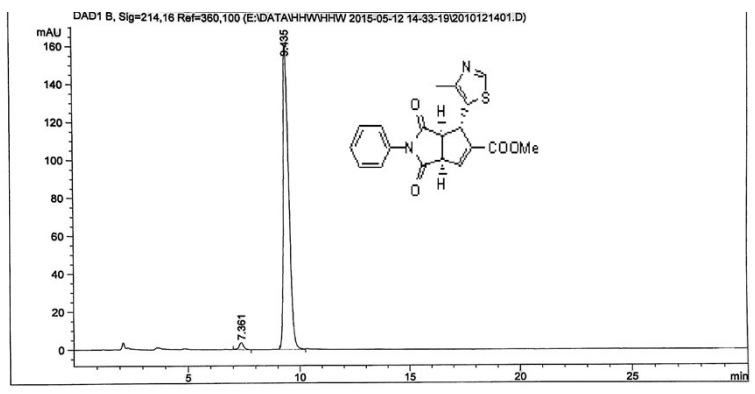

Area Percent Report

Sorted By : Signal  
Multiplier: : 1.0000  
Dilution: : 1.0000  
Use Multiplier & Dilution Factor with ISTDs

Signal 1: DAD1 B, Sig=214,16 Ref=360,100

| Peak # | RetTime [min] | Type | Width [min] | Area [mAU*s] | Height [mAU] | Area %  |
|--------|---------------|------|-------------|--------------|--------------|---------|
| 1      | 7.361         | BB   | 0.2139      | 52.66909     | 3.70407      | 1.8520  |
| 2      | 9.435         | BB   | 0.2648      | 2791.22827   | 162.17851    | 98.1480 |

Totals : 2843.89736 165.88258

\*\*\* End of Report \*\*\*

## II. NMR/MS Spectra of the catalysts and the products

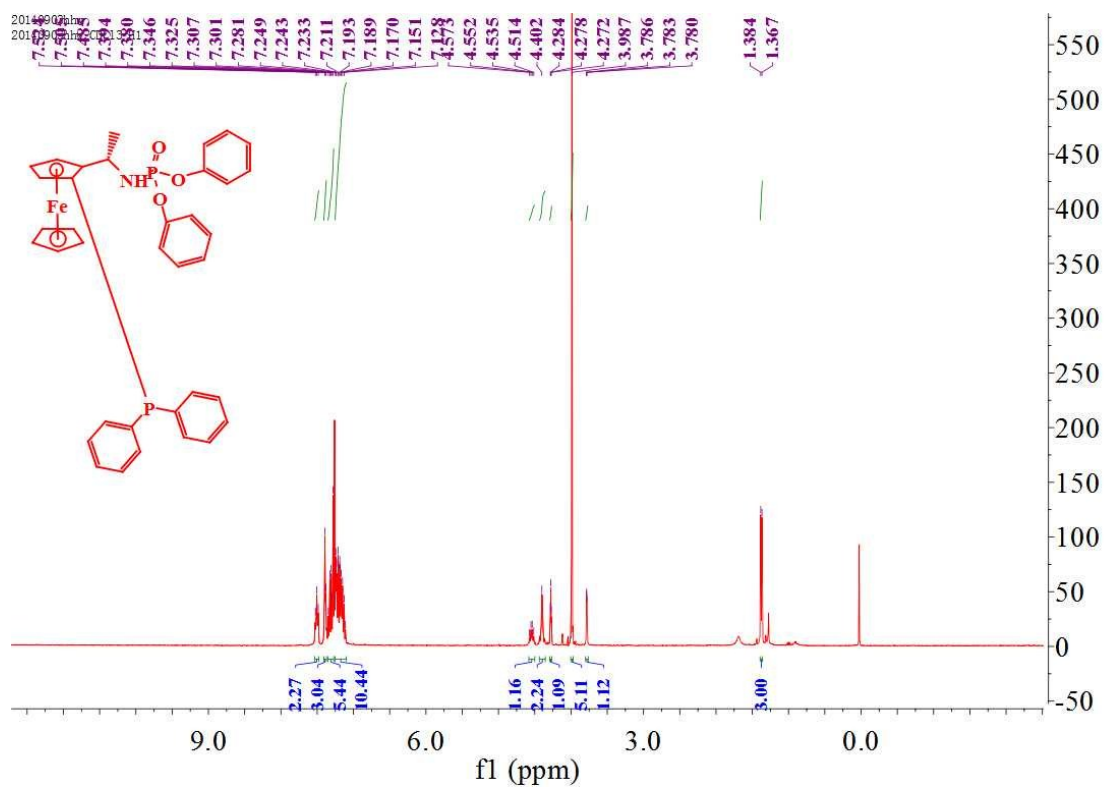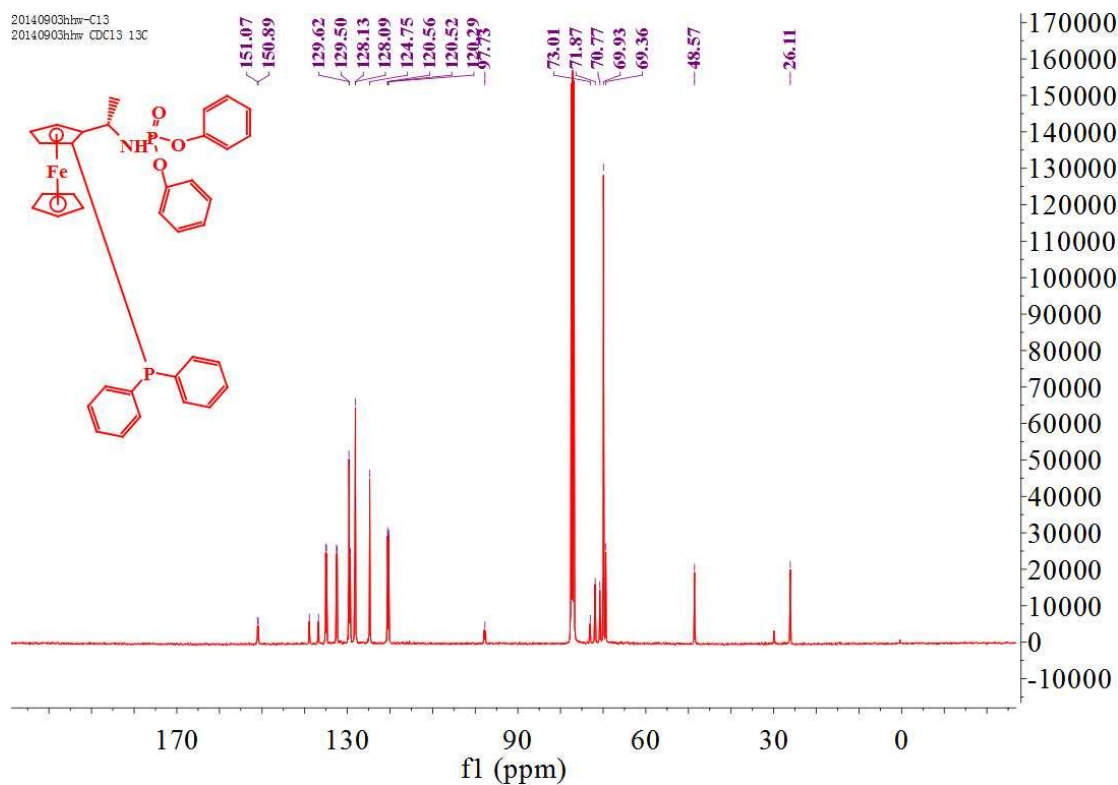

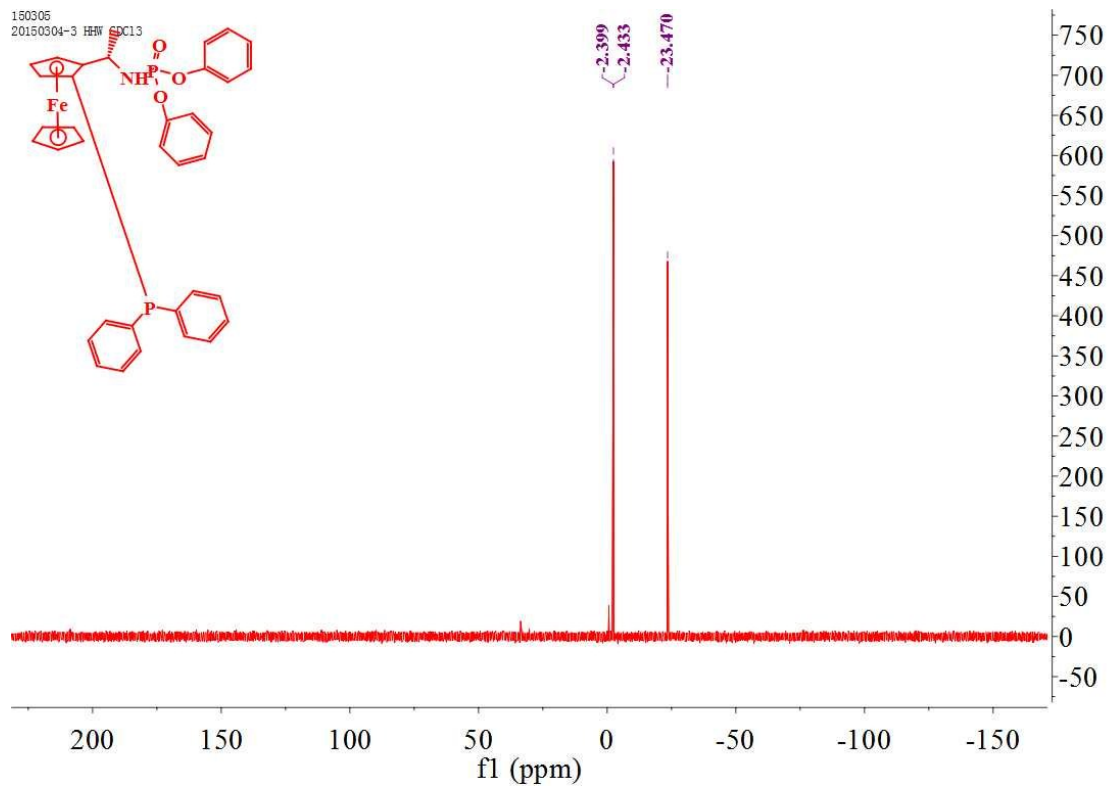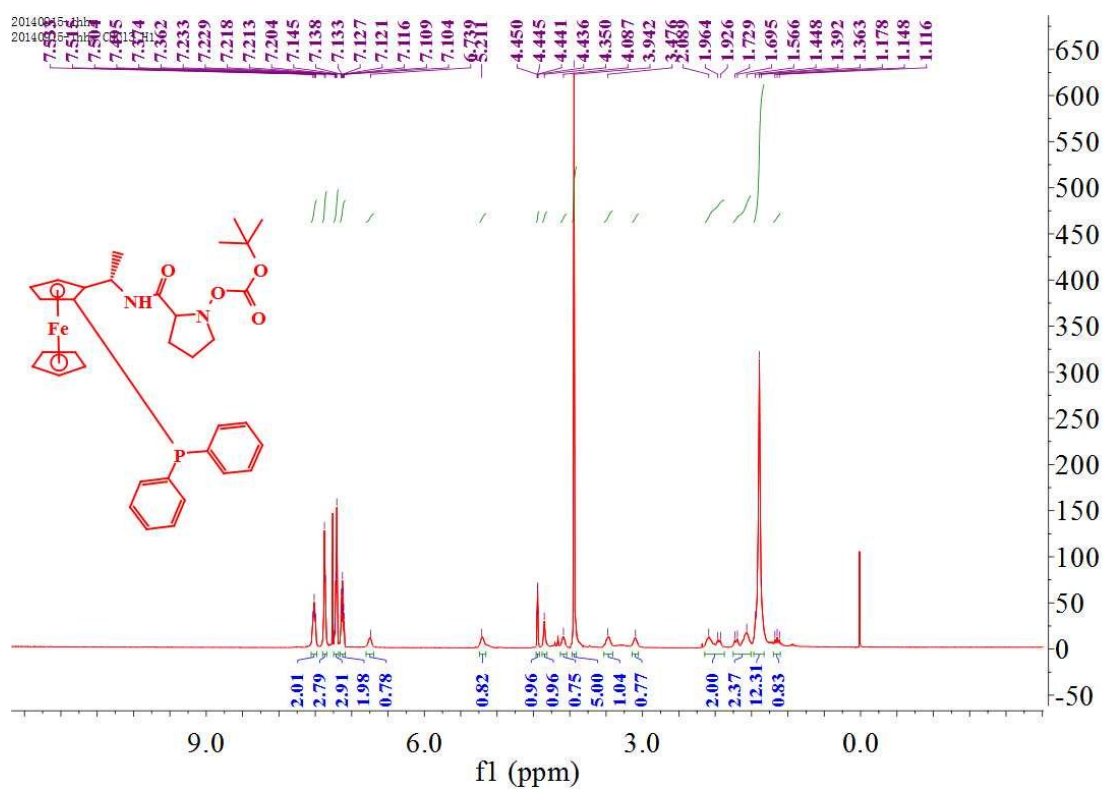

20150304-4hbw-c13  
20150304-4hbw CDCl3 C13

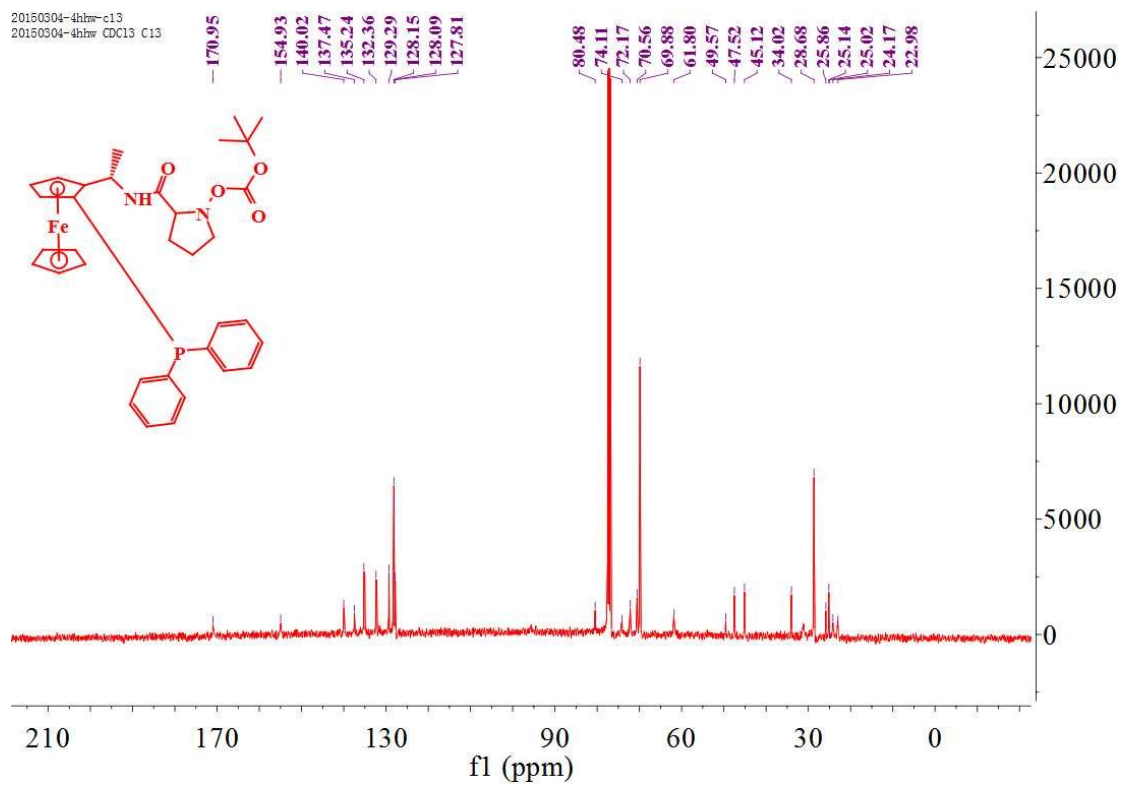

150305  
20160304-4 HHW CDCl3

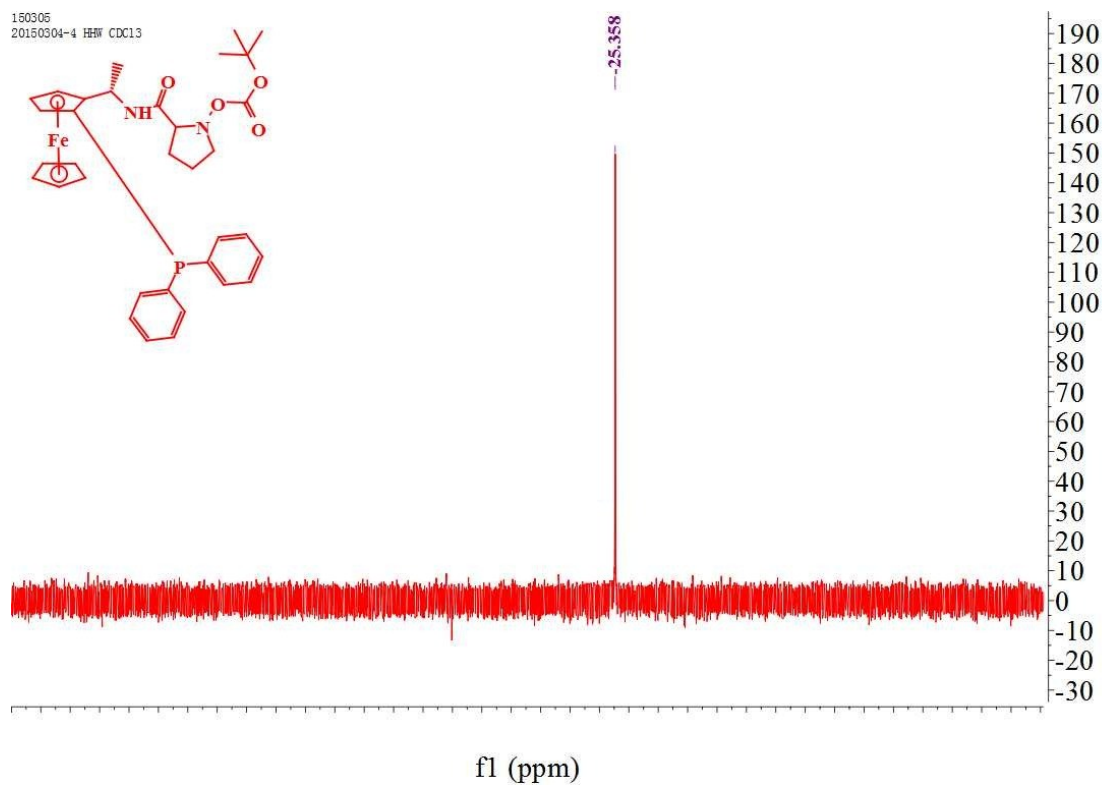



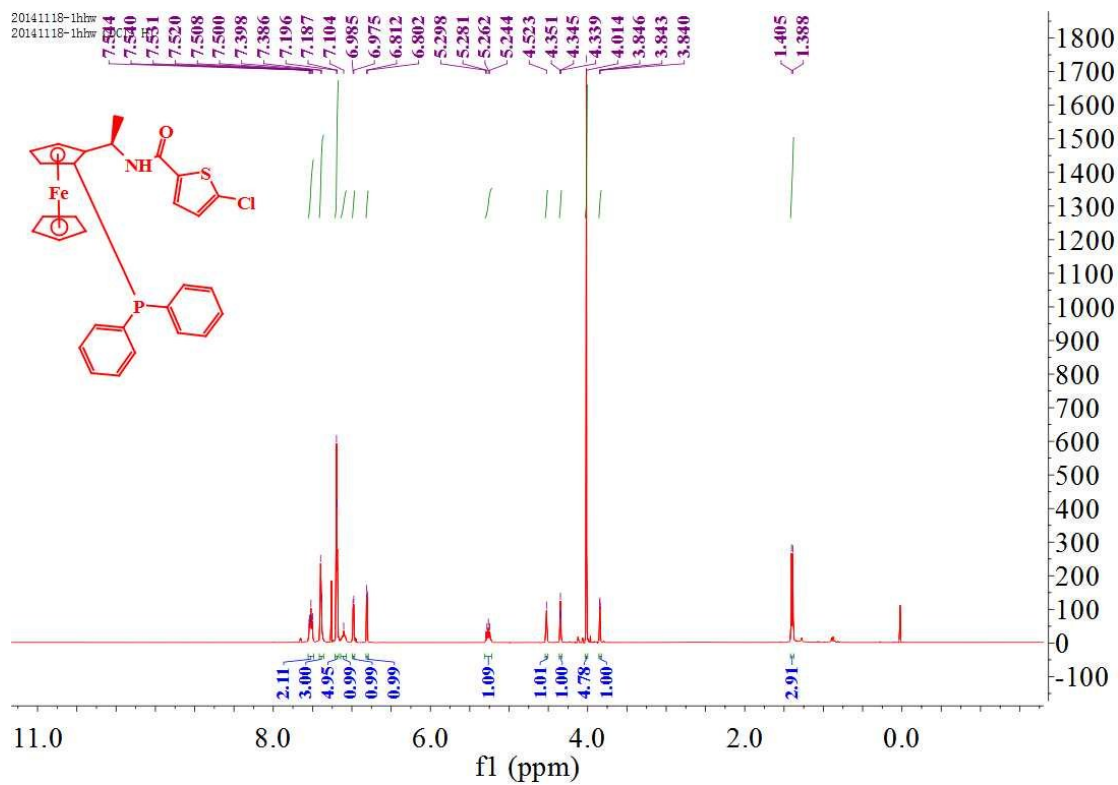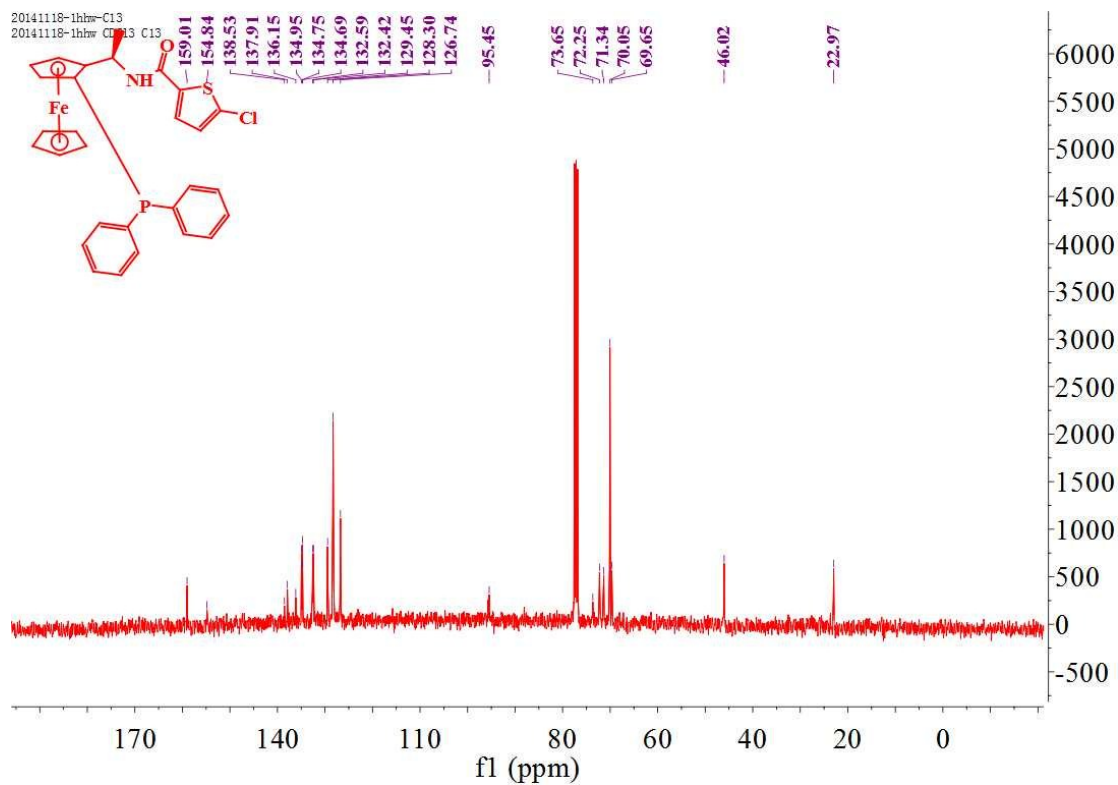

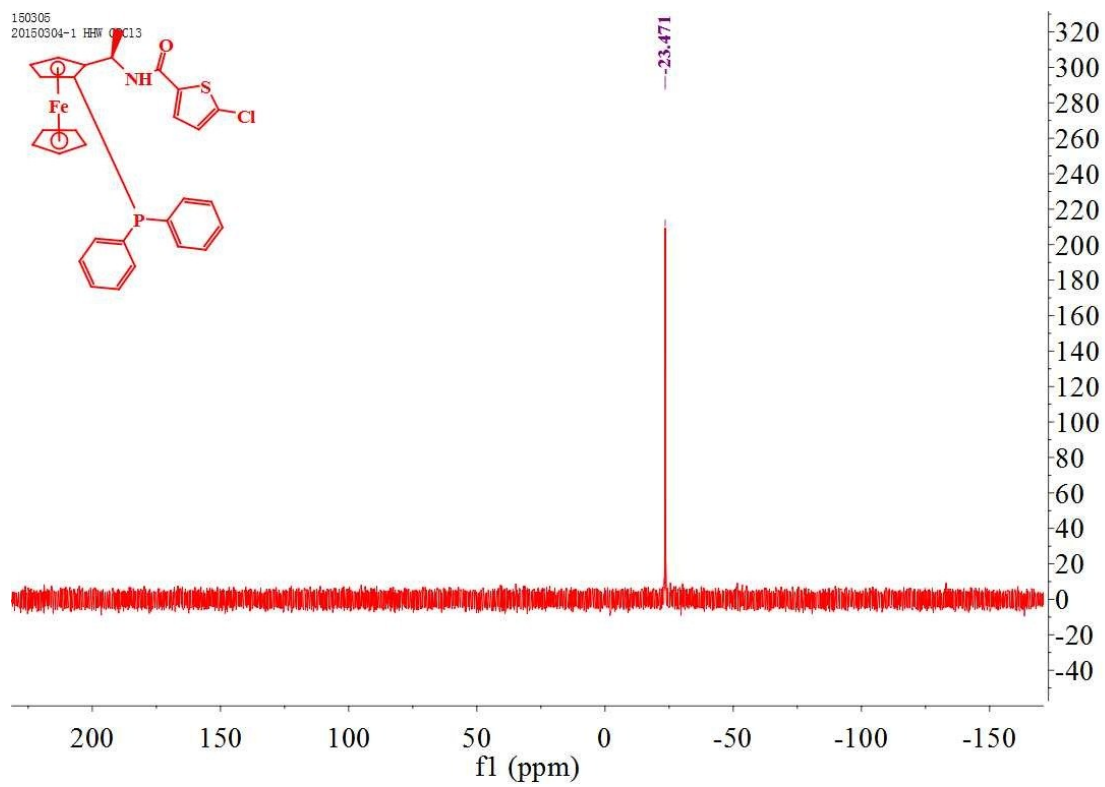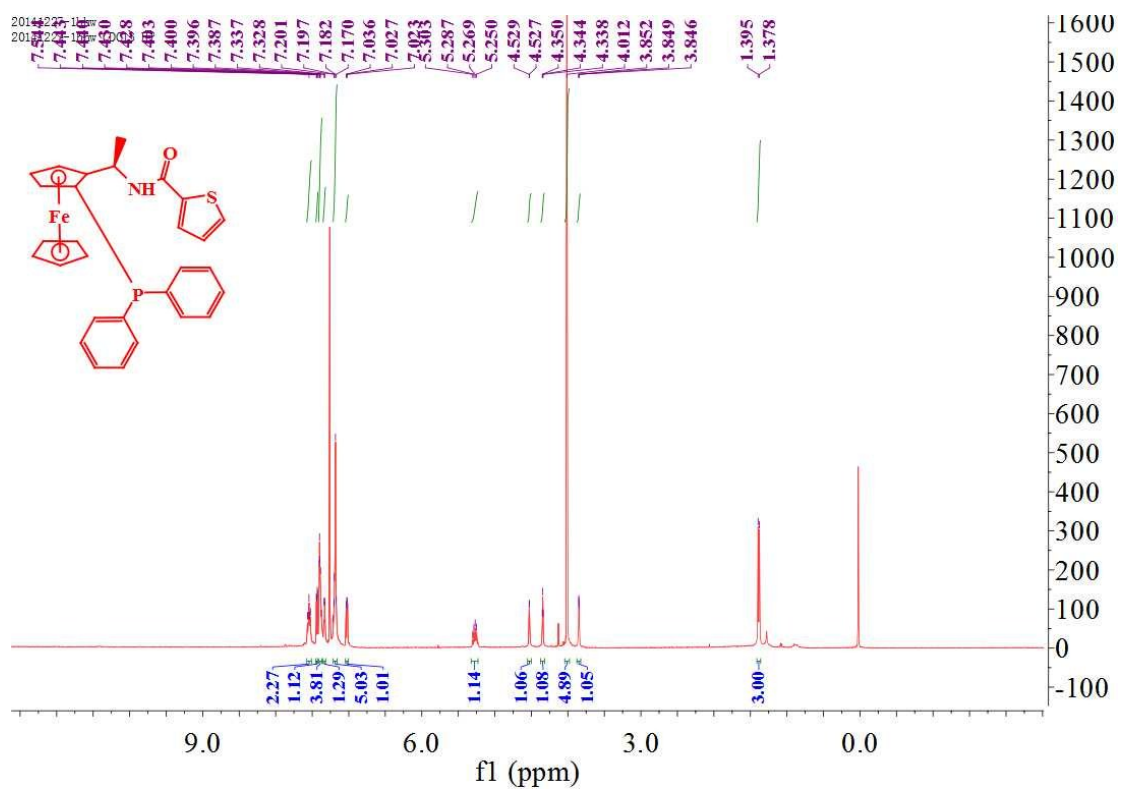

hlm20141227-1-c13  
hlm20141227-1 CDCl3 13C

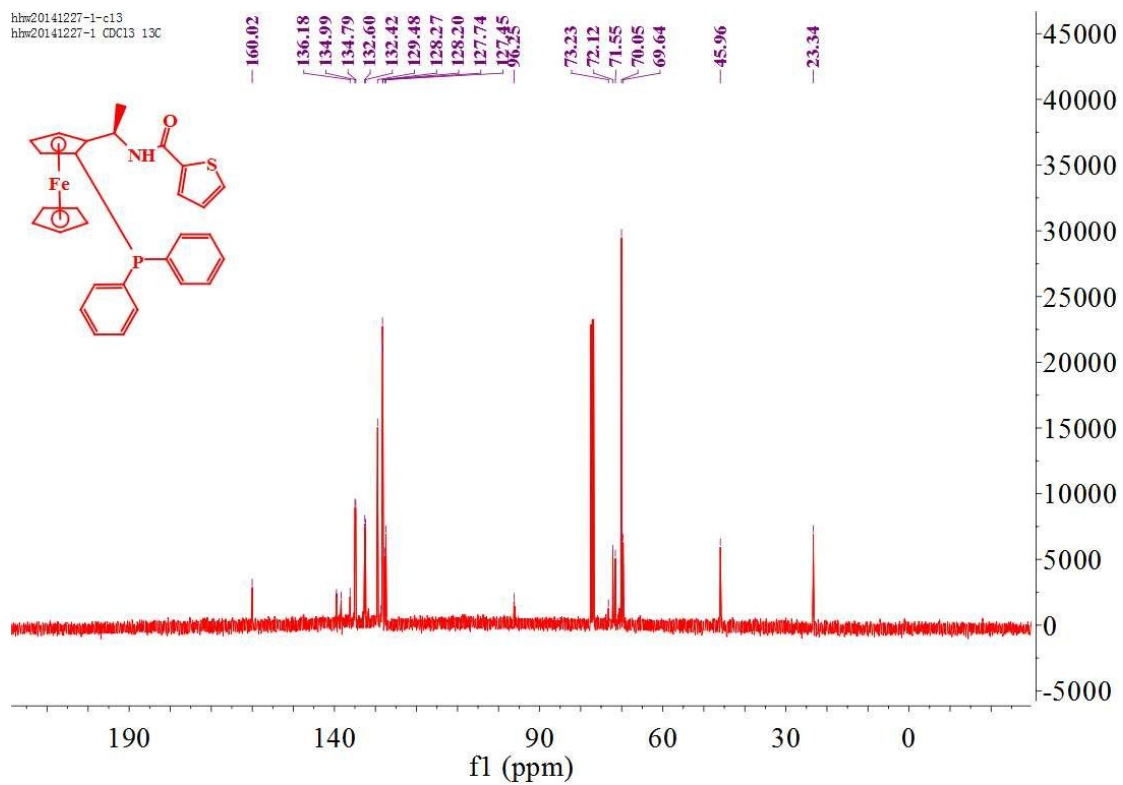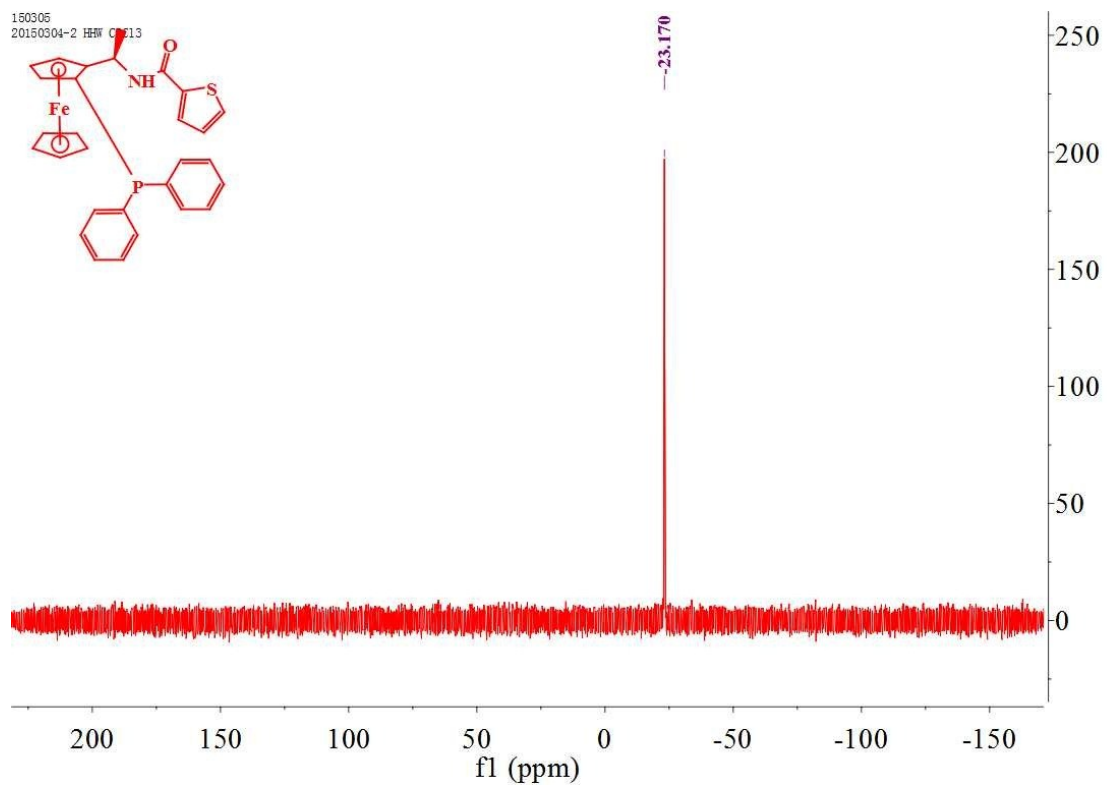

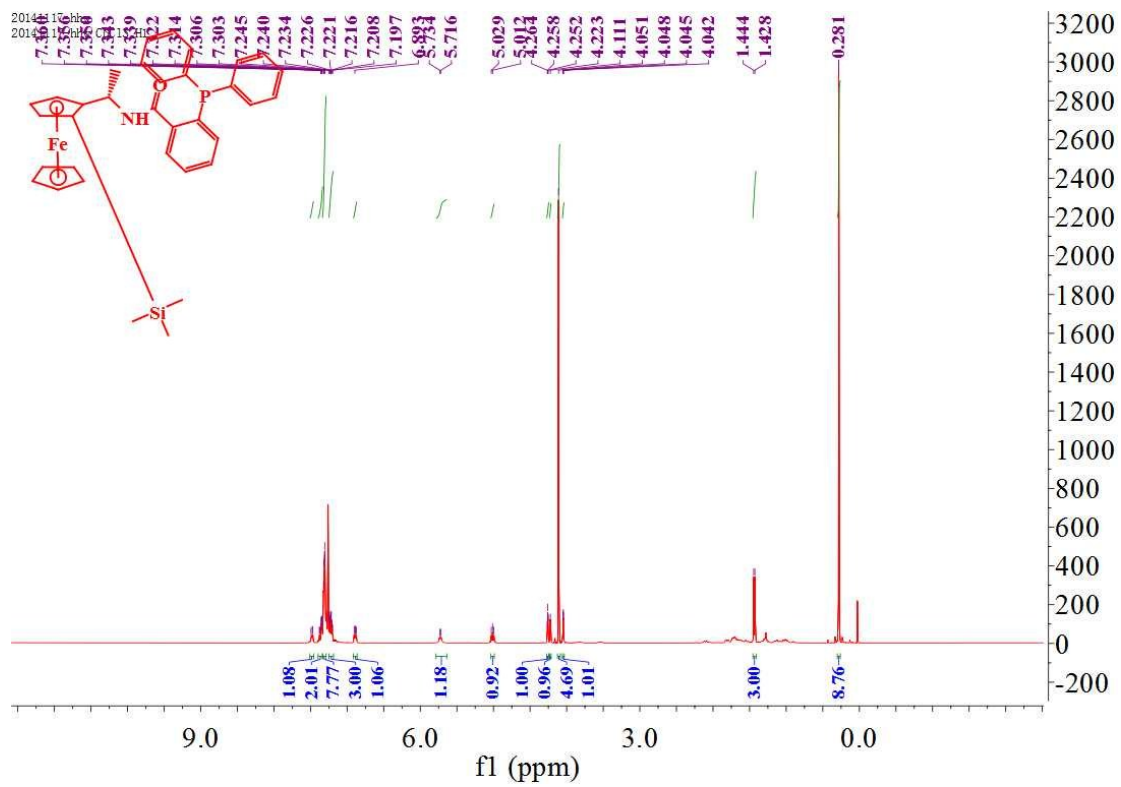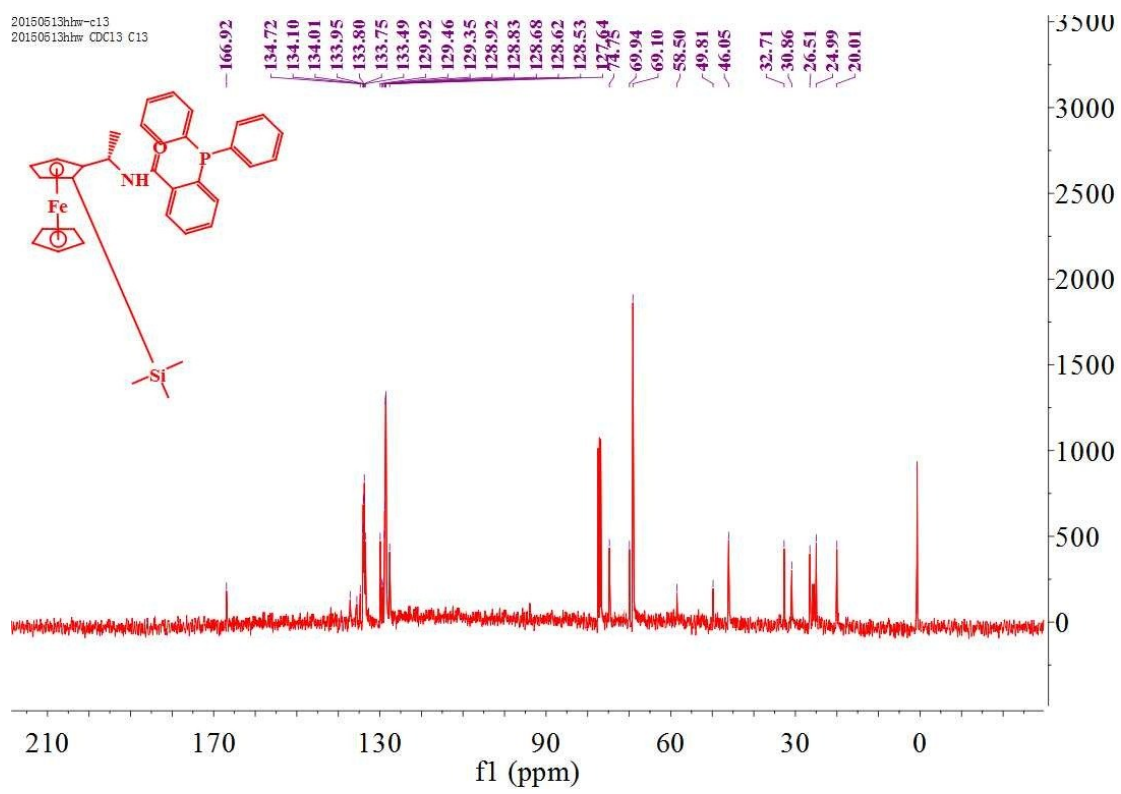

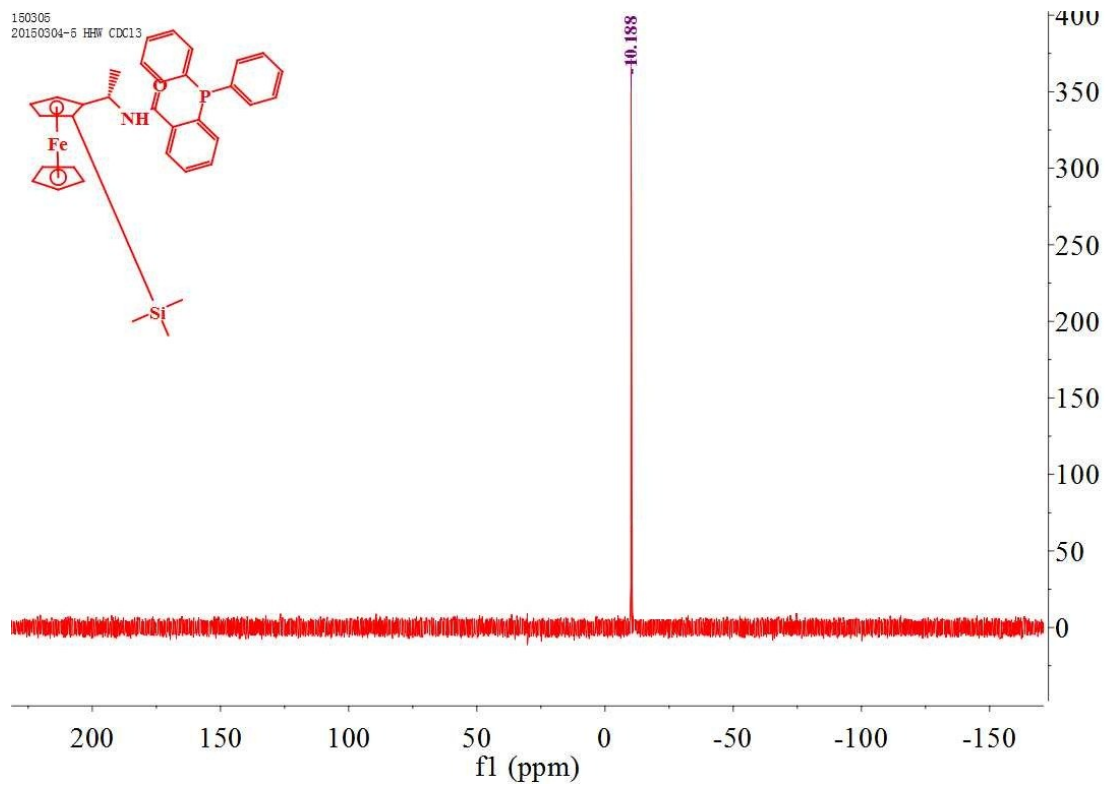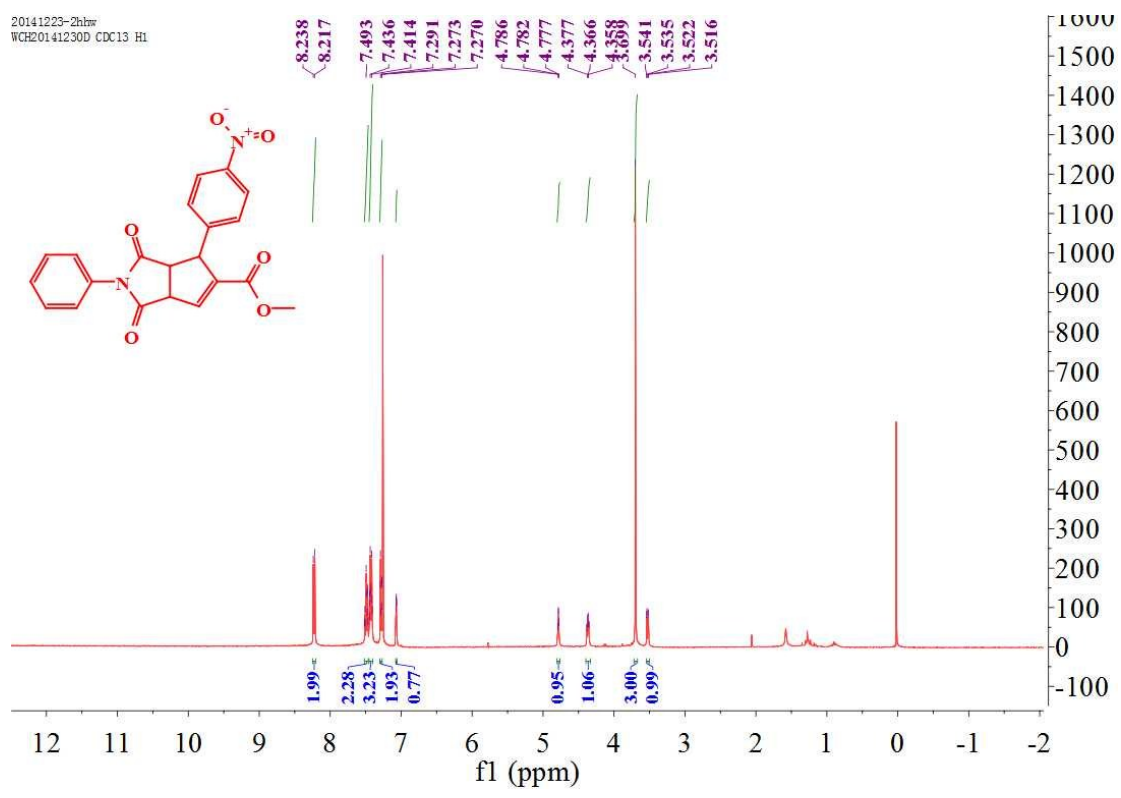

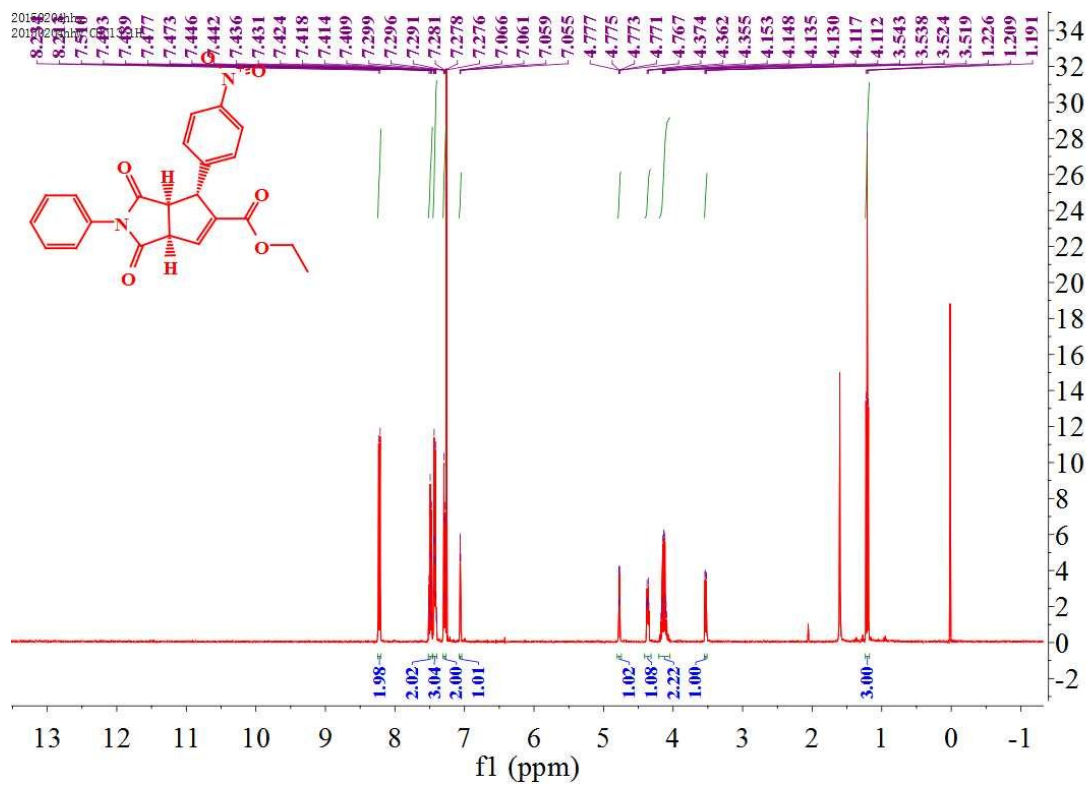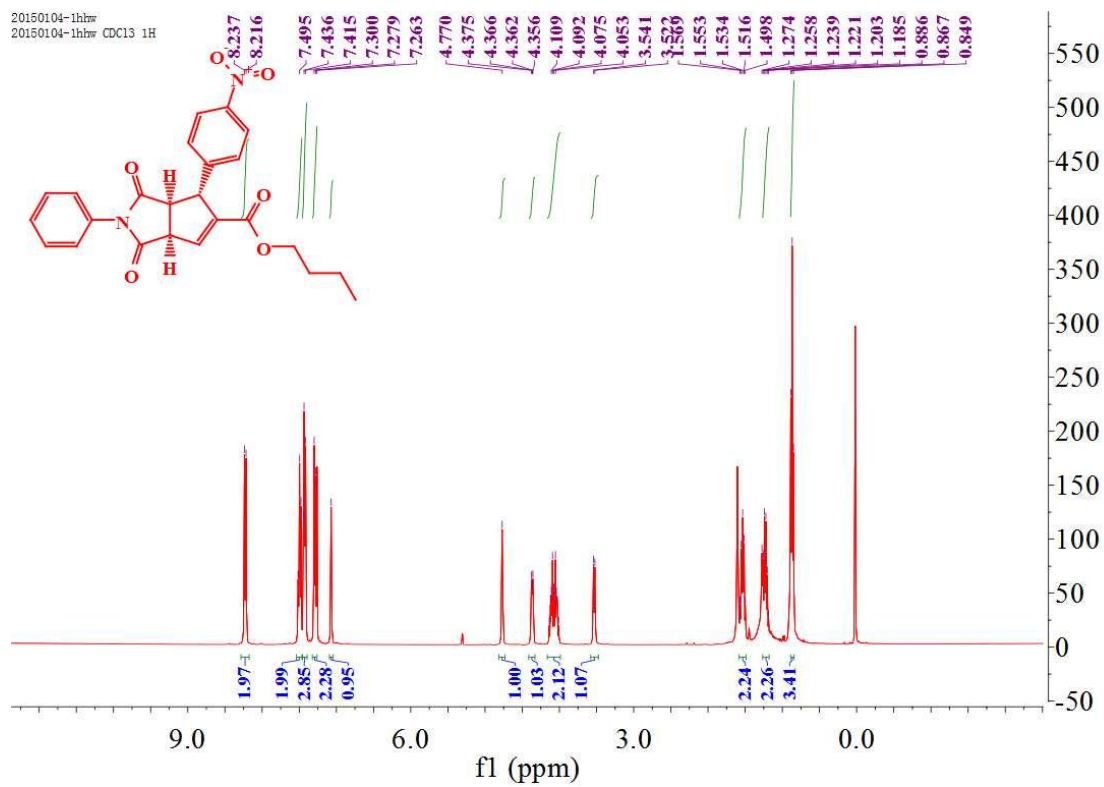

20141226-2hbw  
20141226-2hbw CDCl3 H1

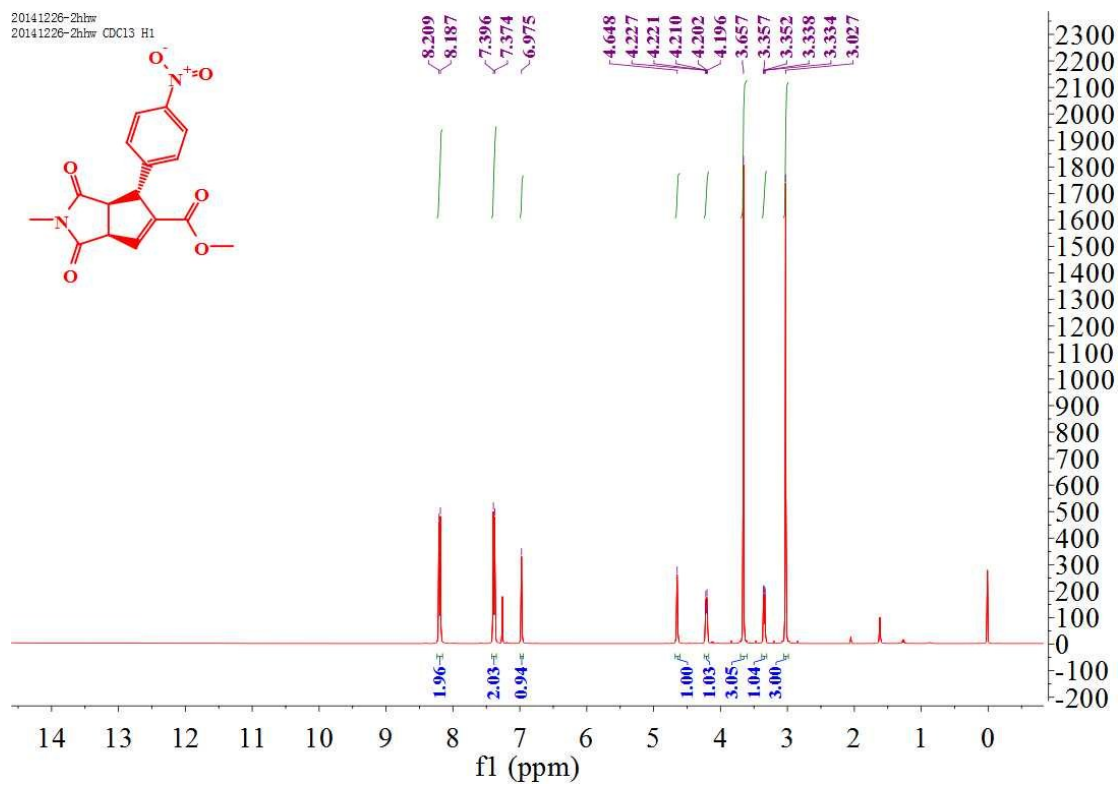

20141226-1Hhw  
MP103P67 CDCl3 H1

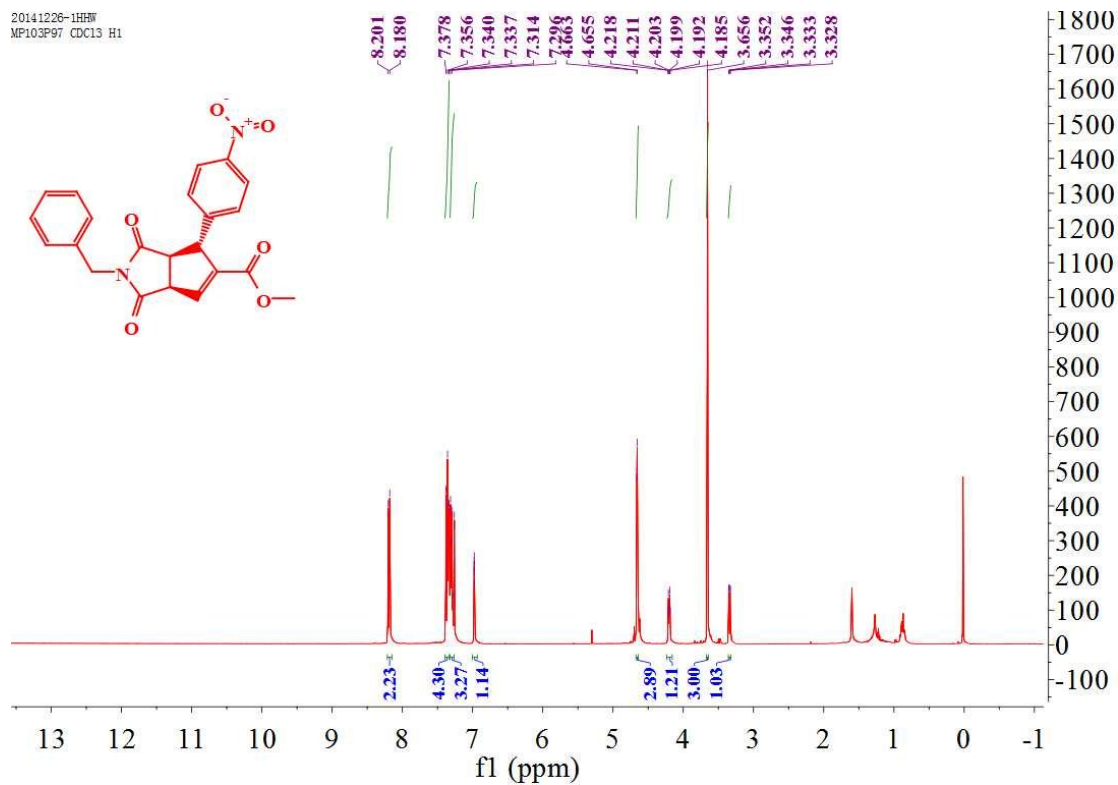

20141231-2hzw  
20141231-2hzw CDCl3 H1

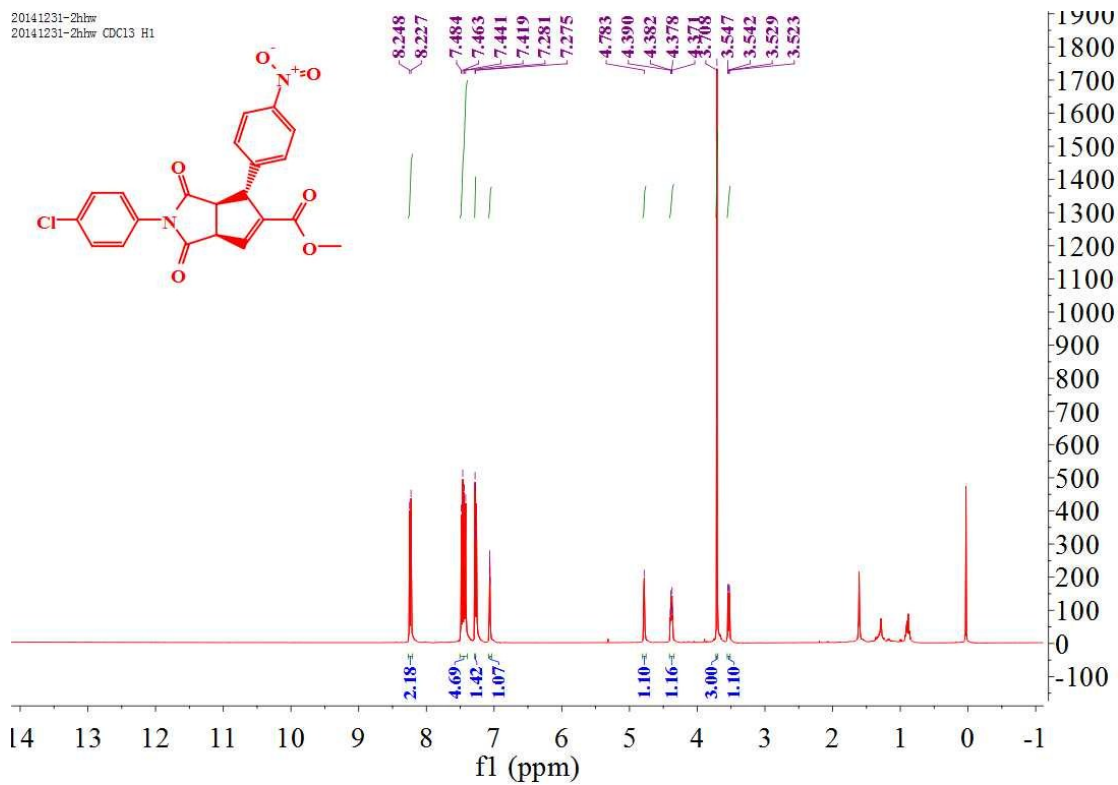

20150313hzw  
20150313hzw CDCl3 H1

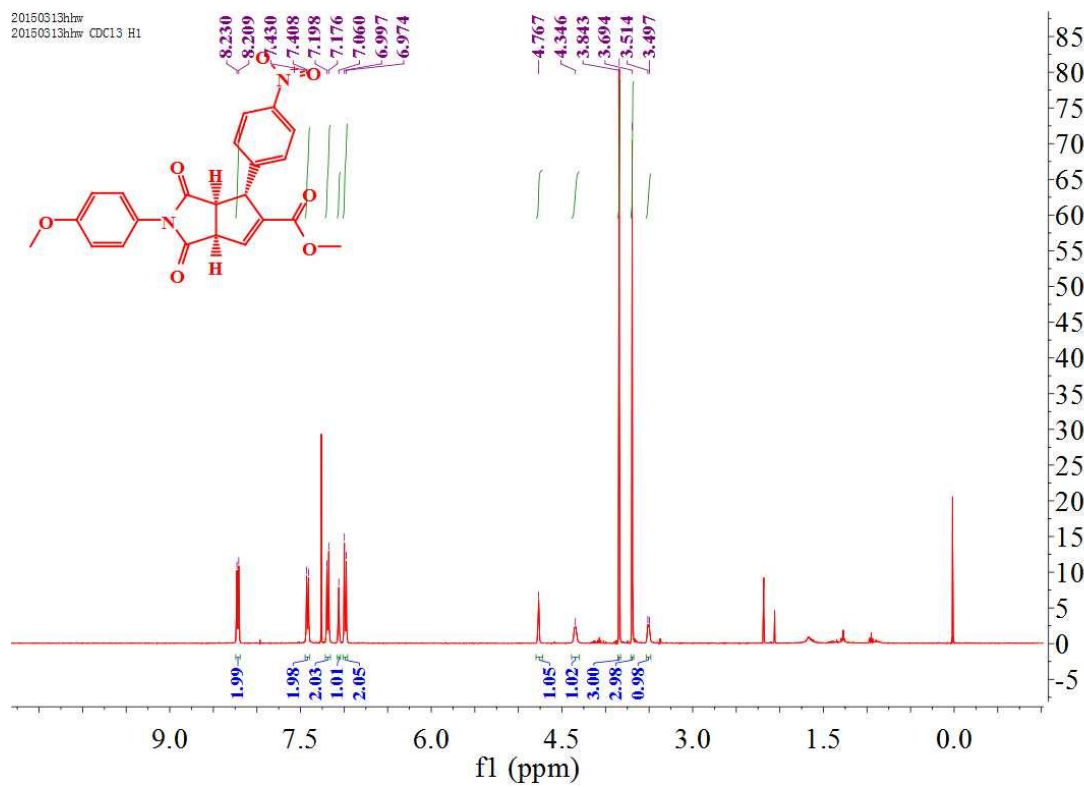



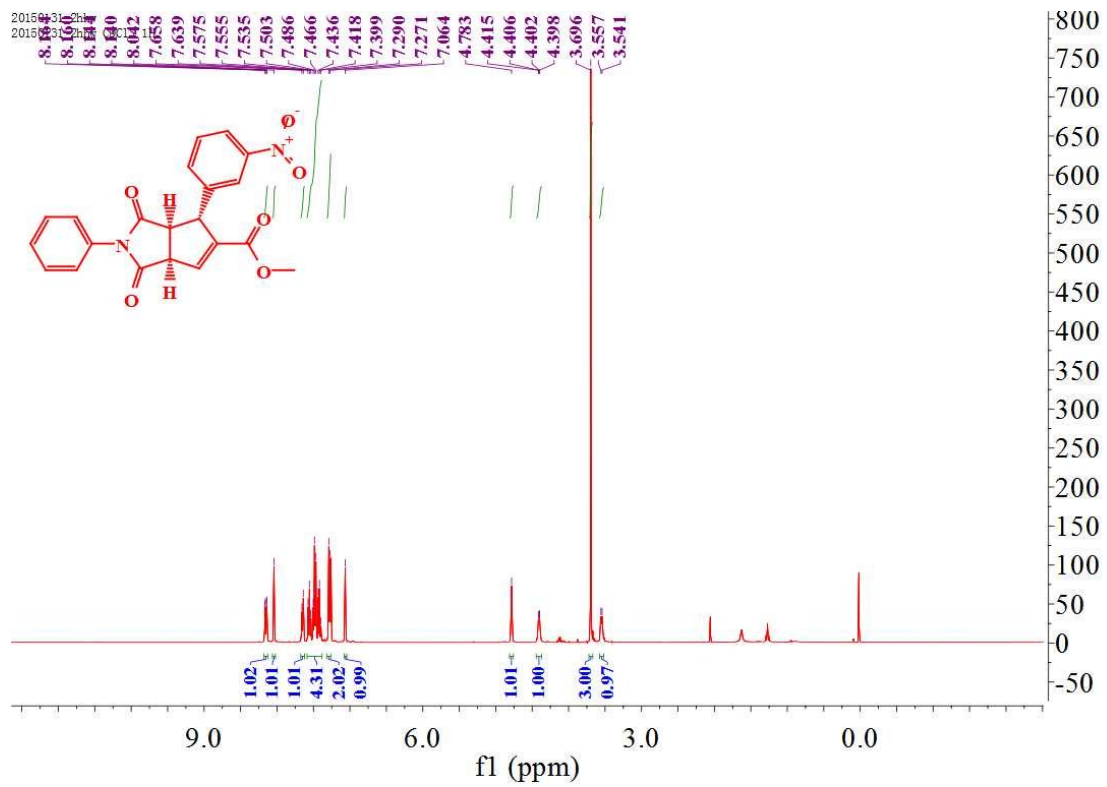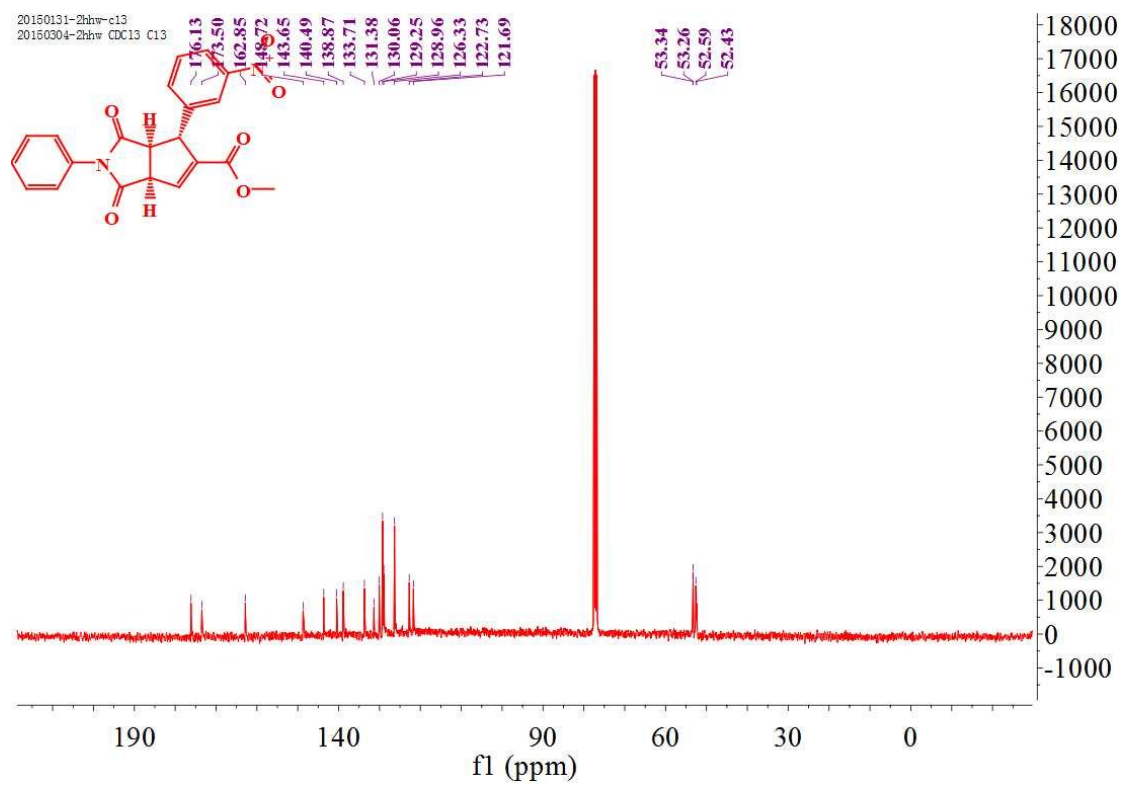

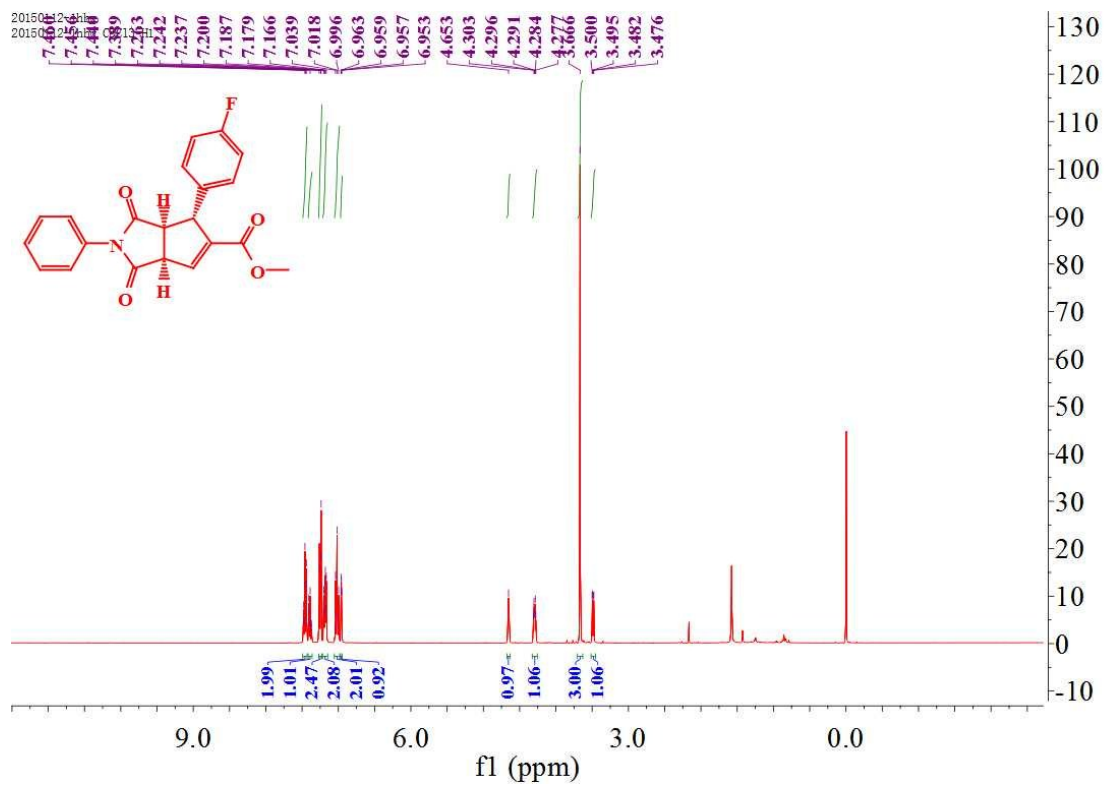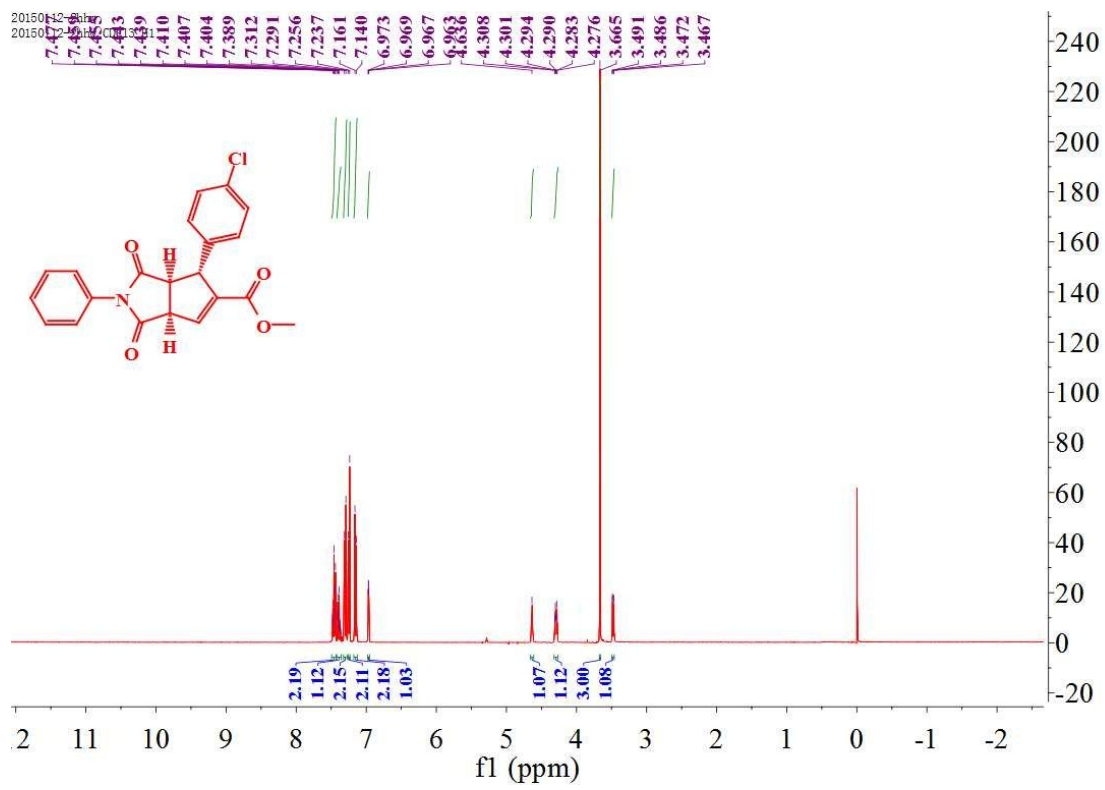

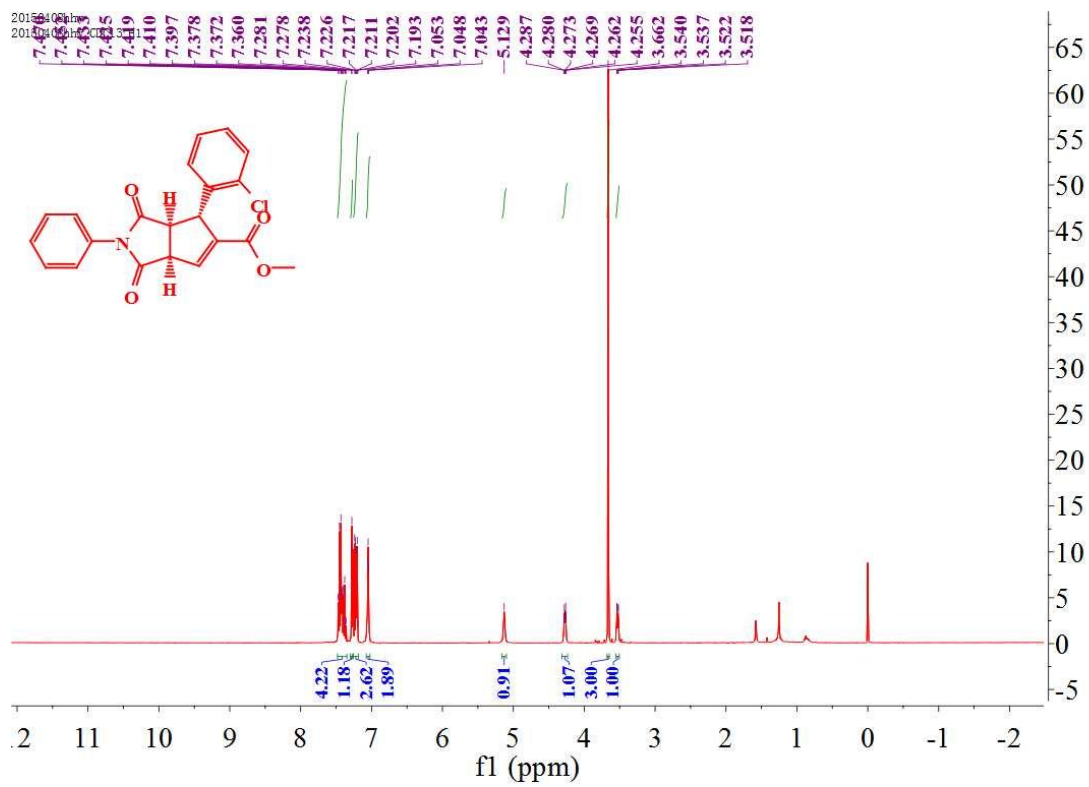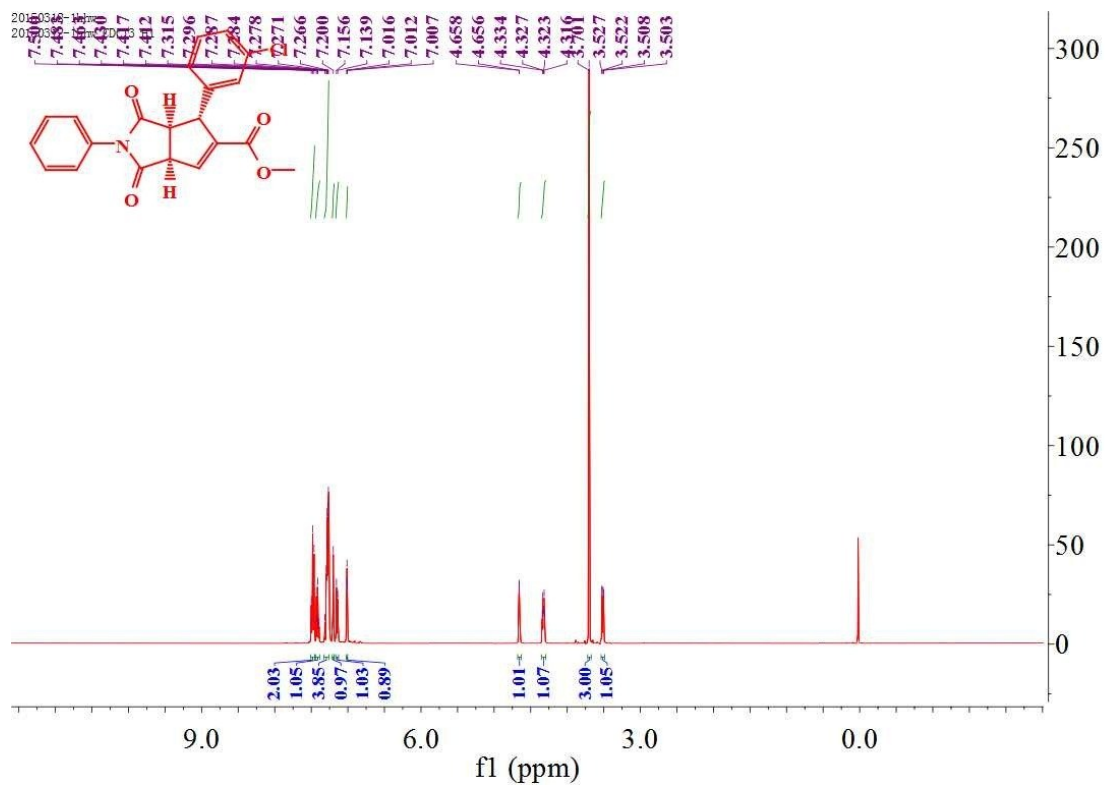

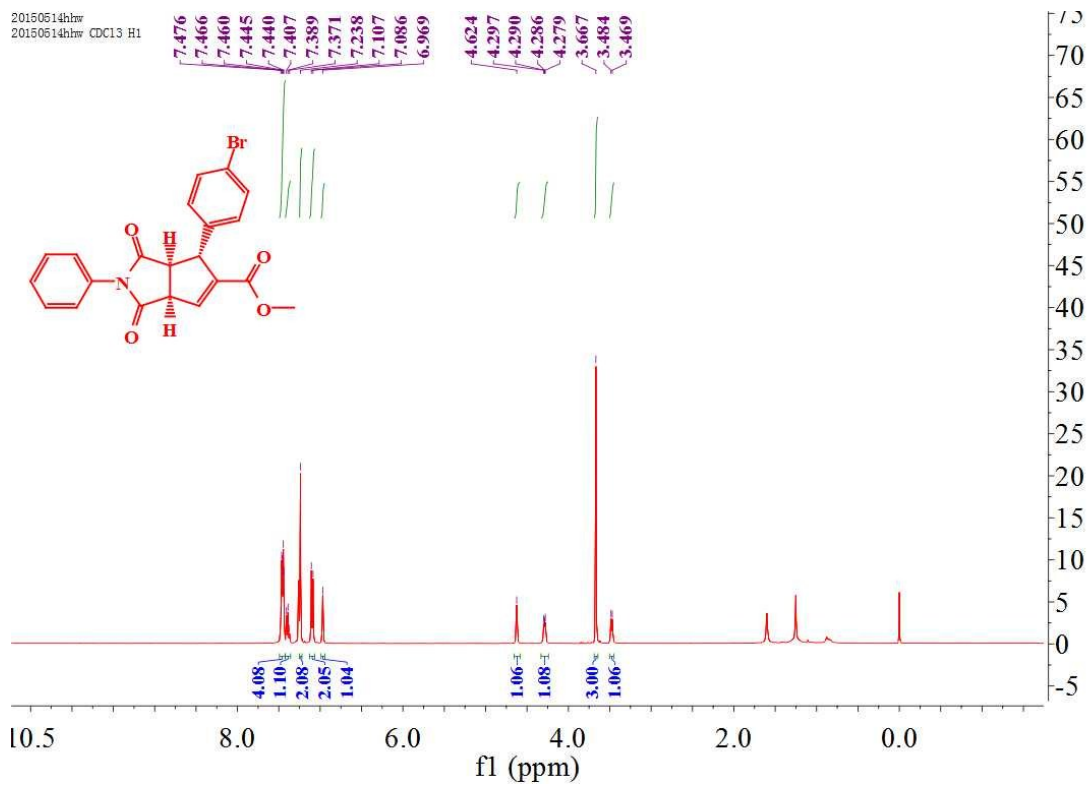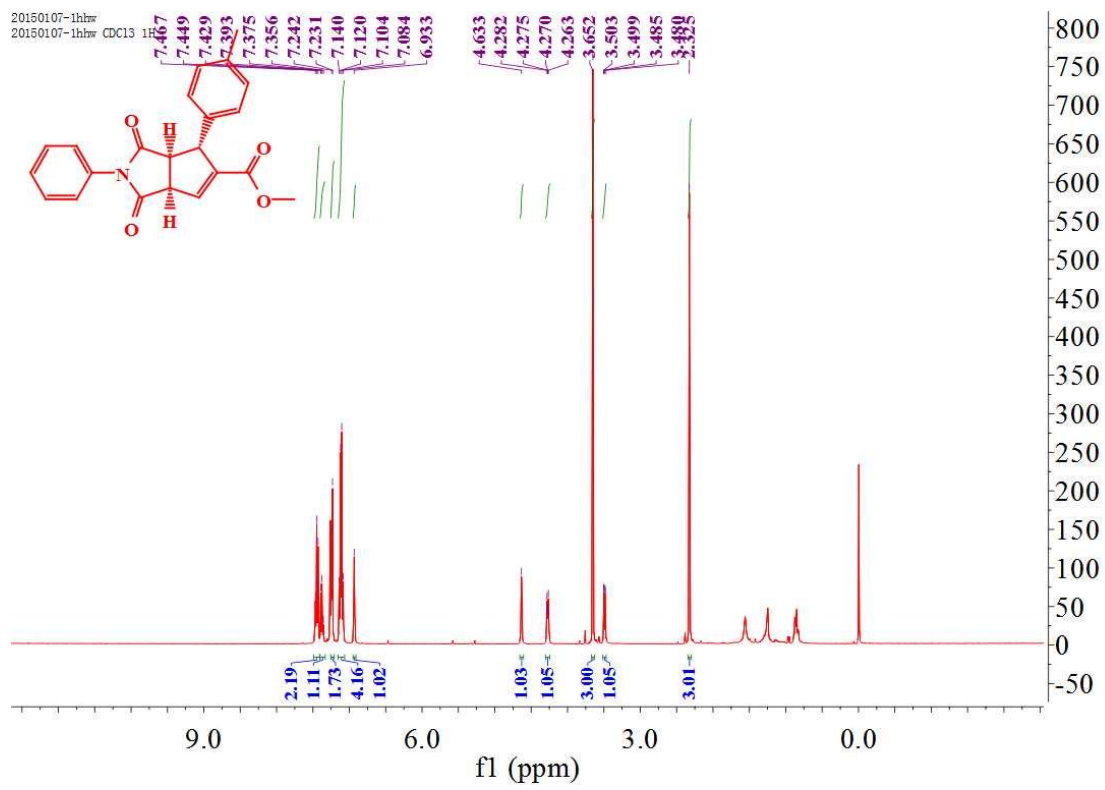

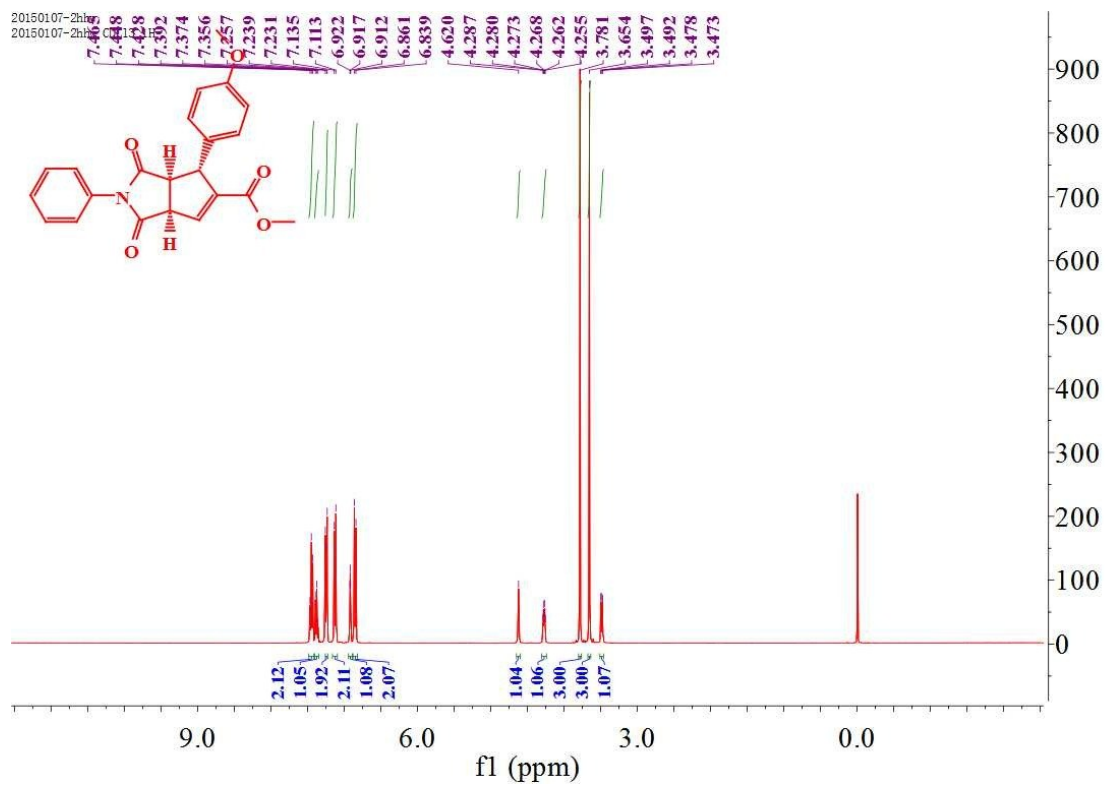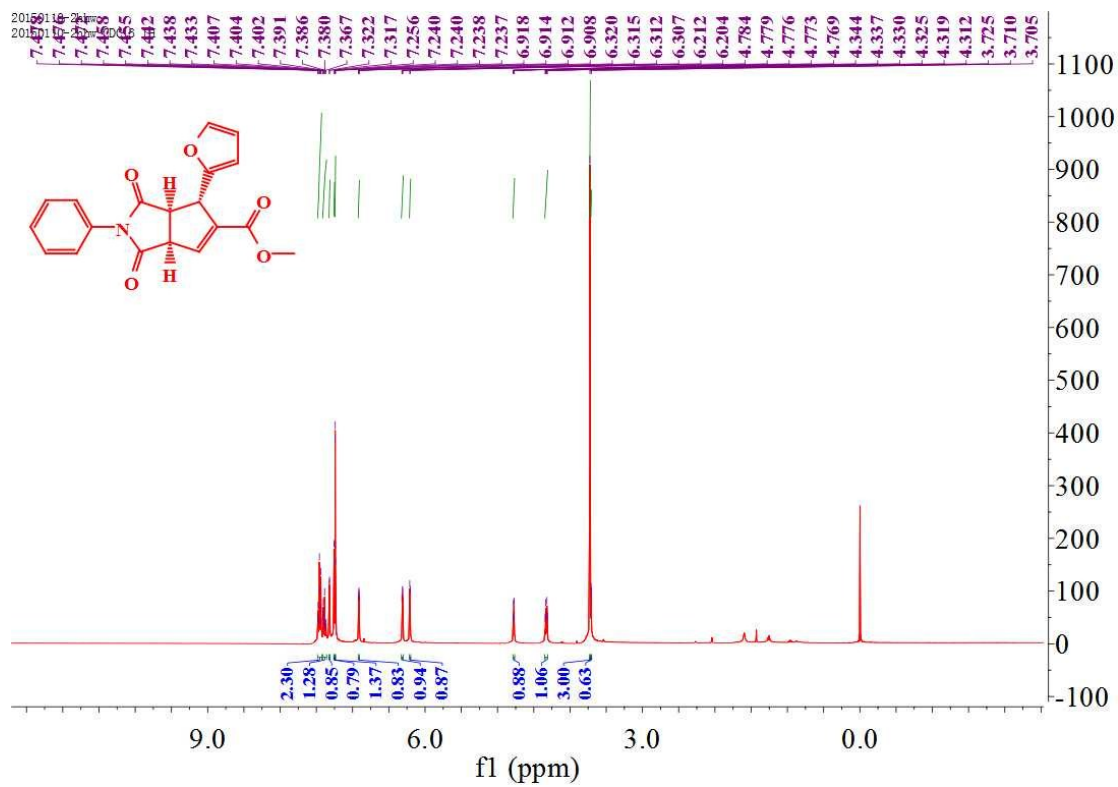

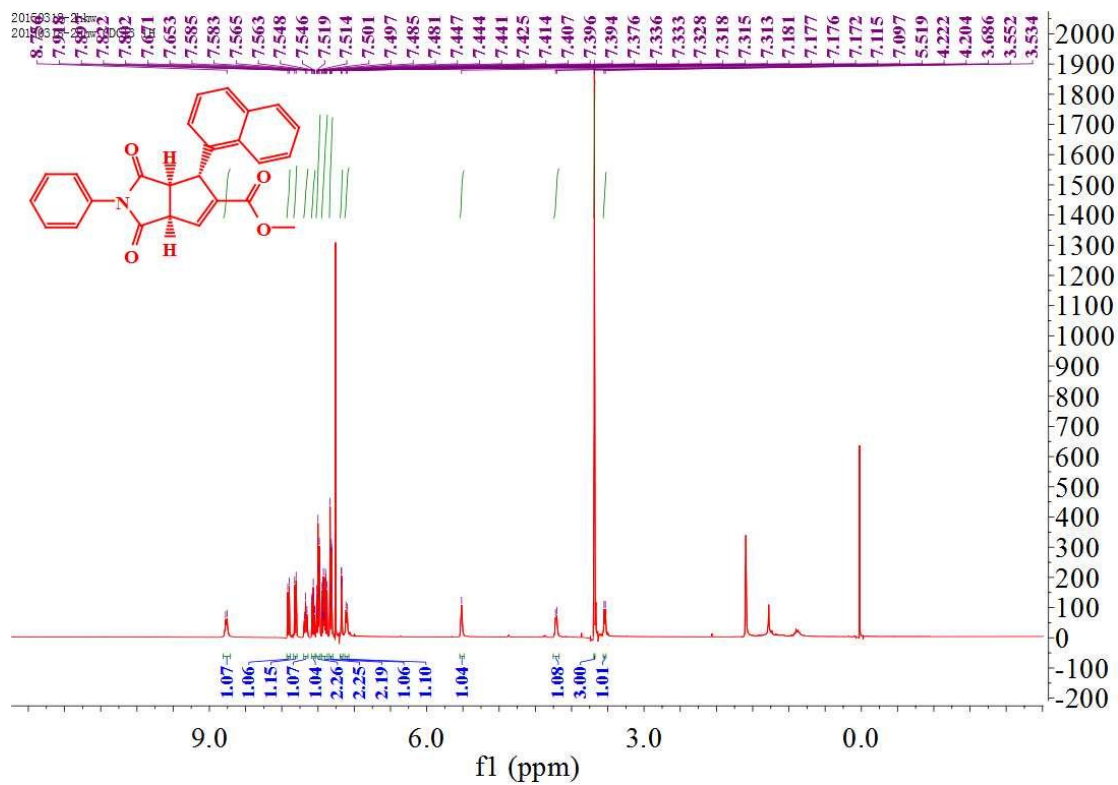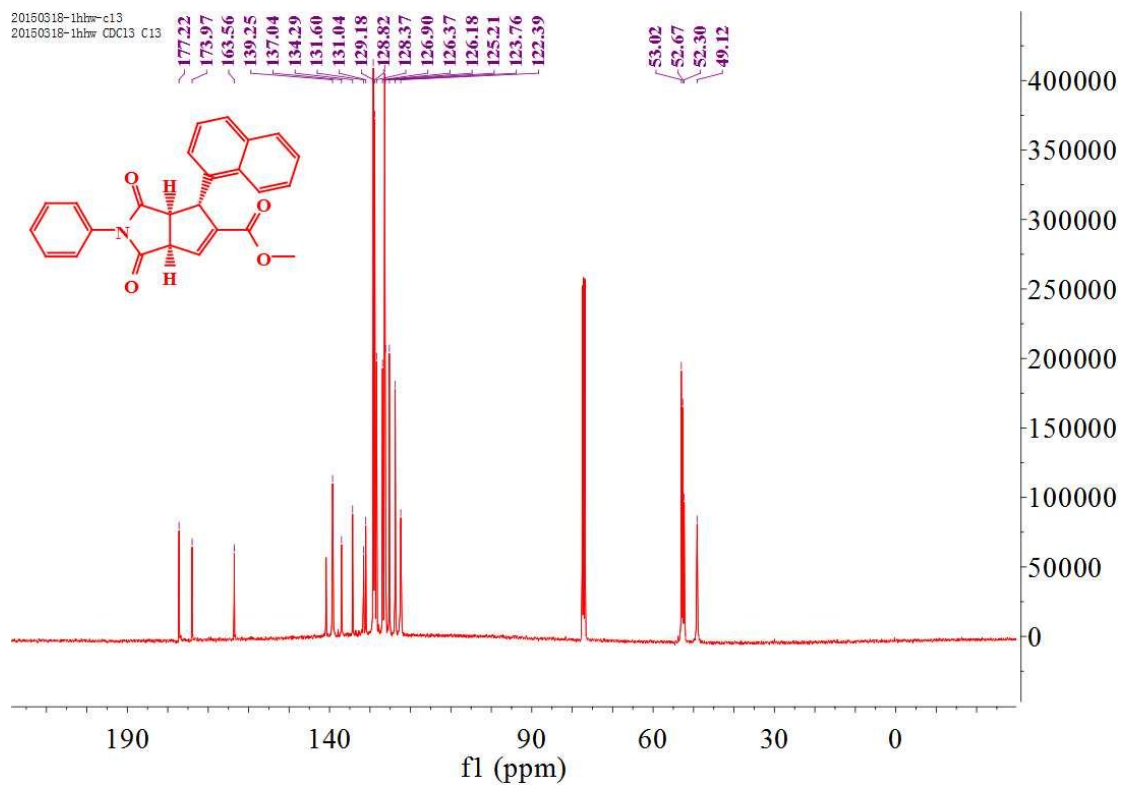

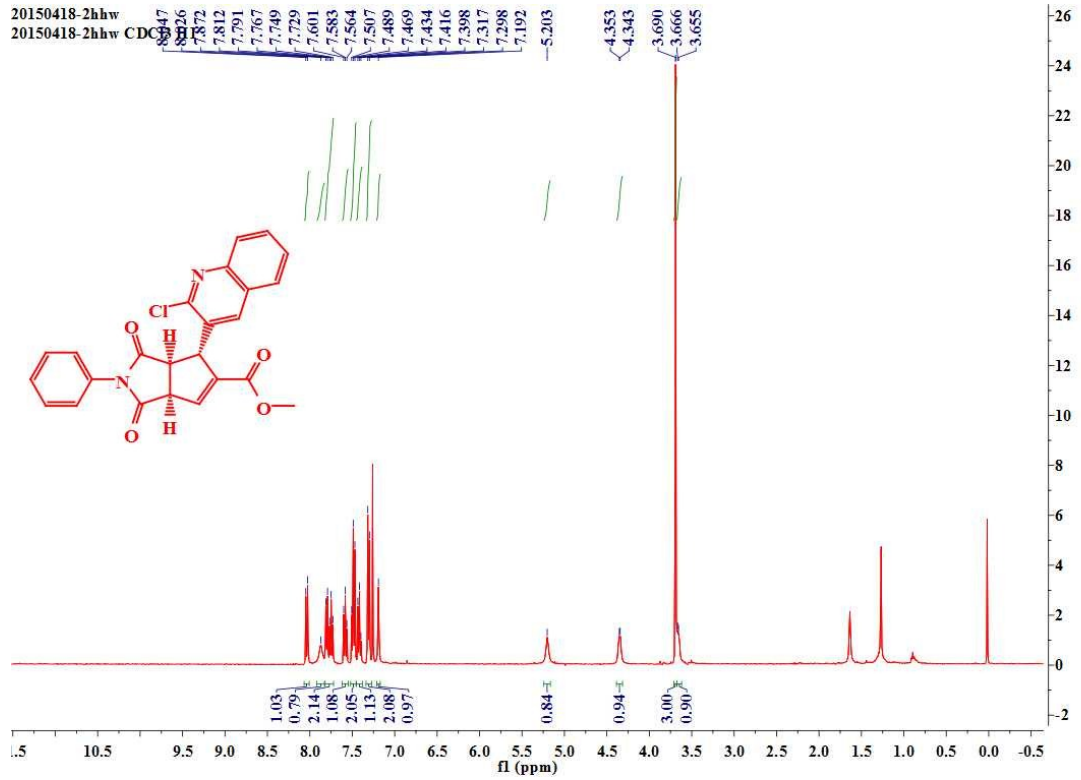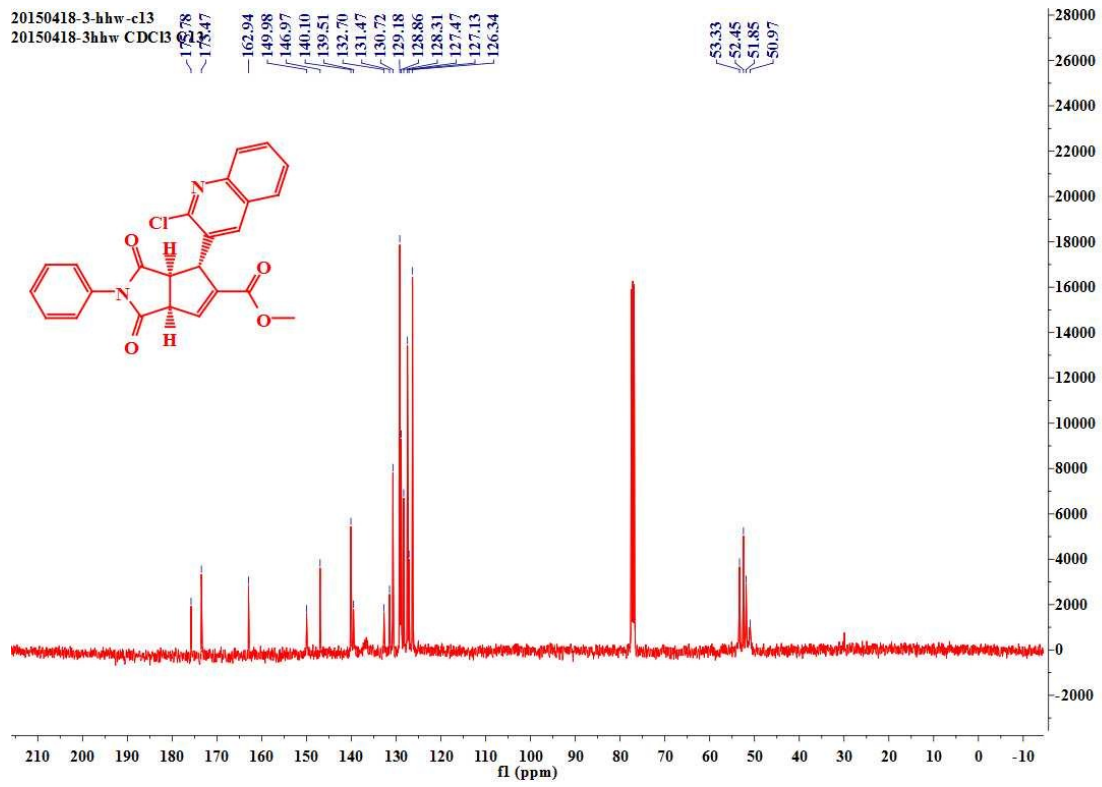

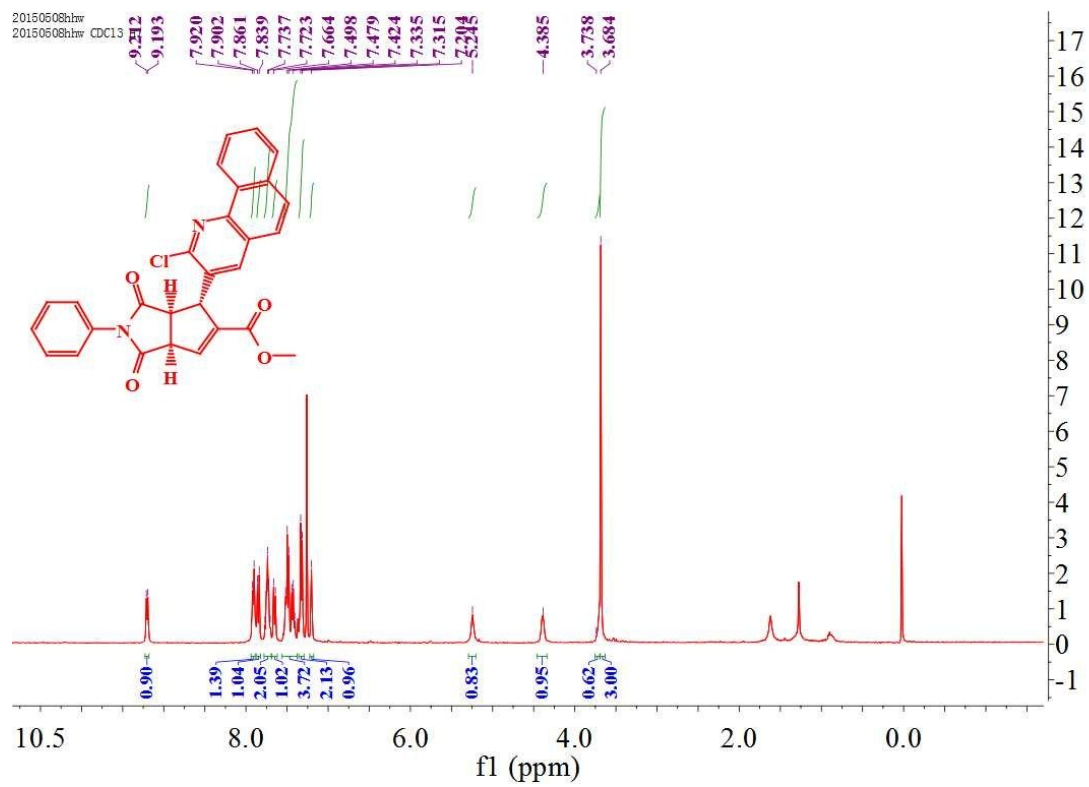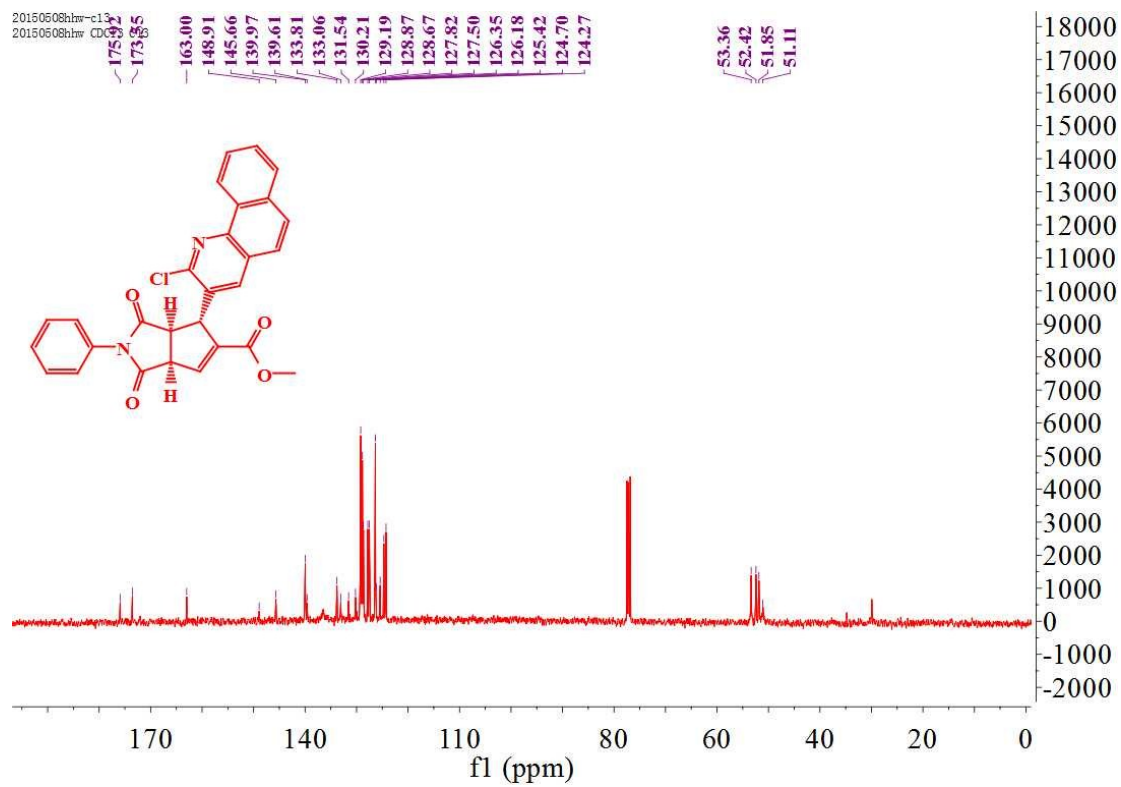



20150420hnr  
20150420hnr CDC13 H1

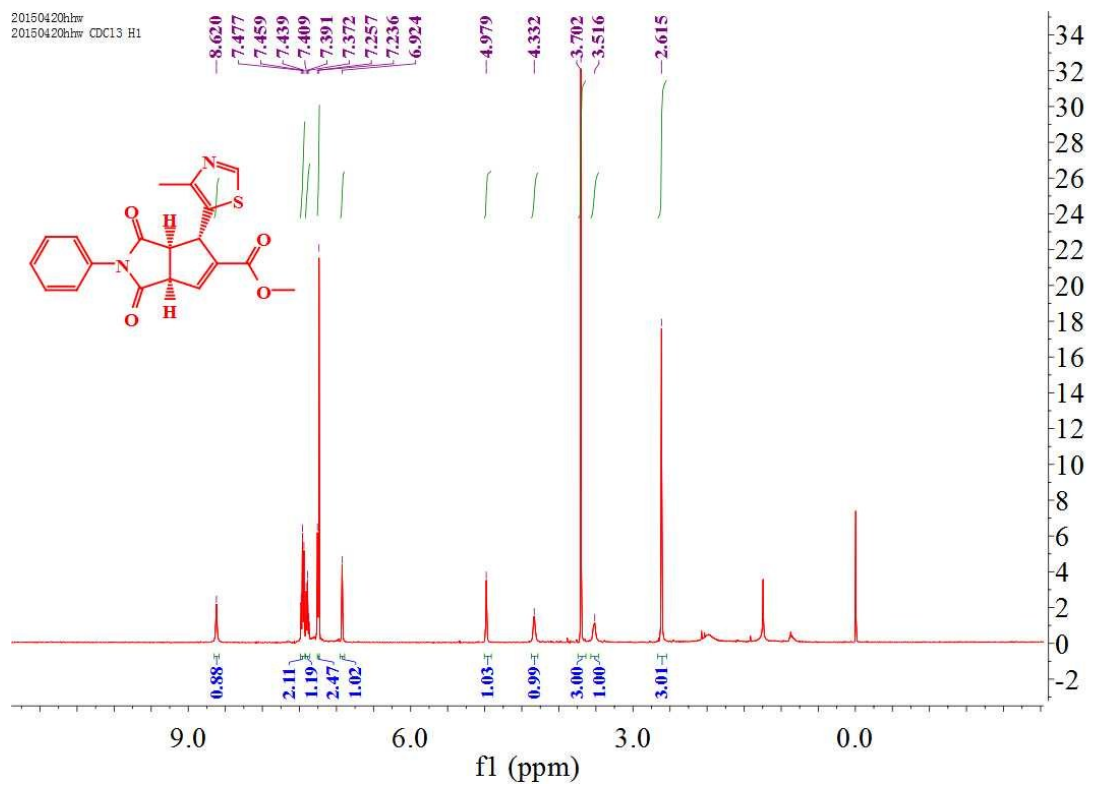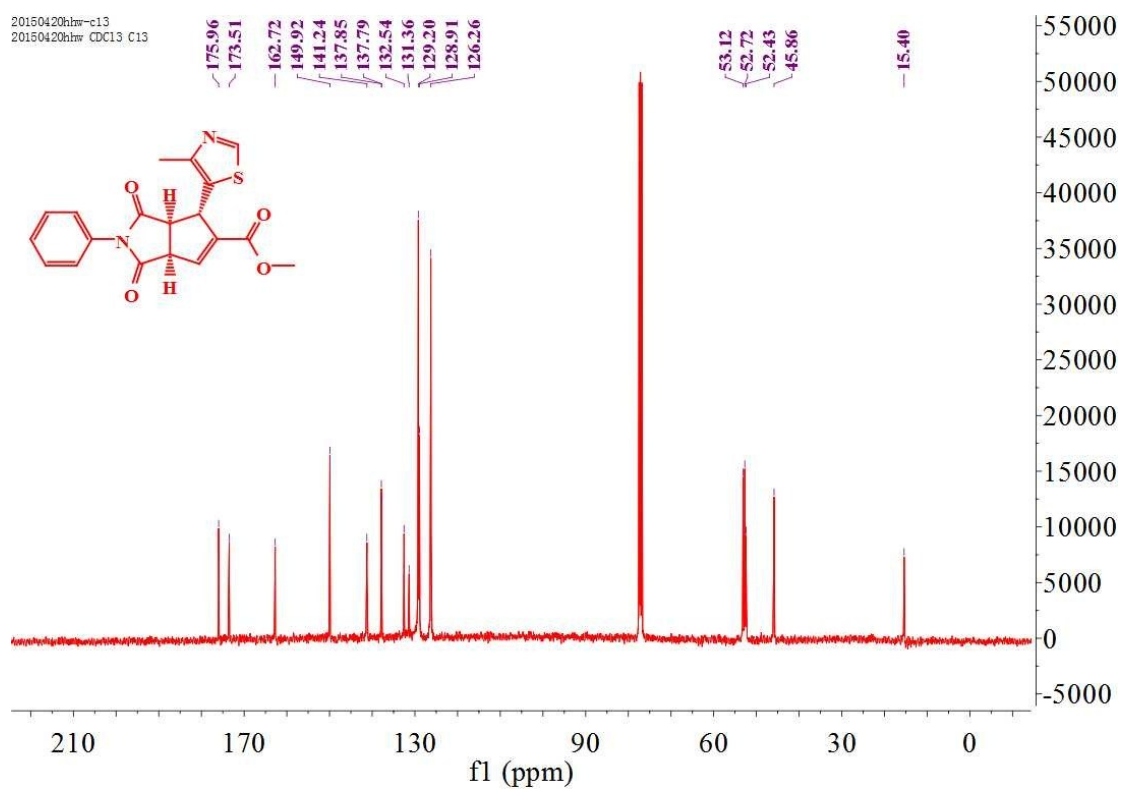

20140903hhw #1 RT: 0.00 AV: 1 NL: 2.58E6  
T: + c ESI.ms [ 400.00-1000.00]

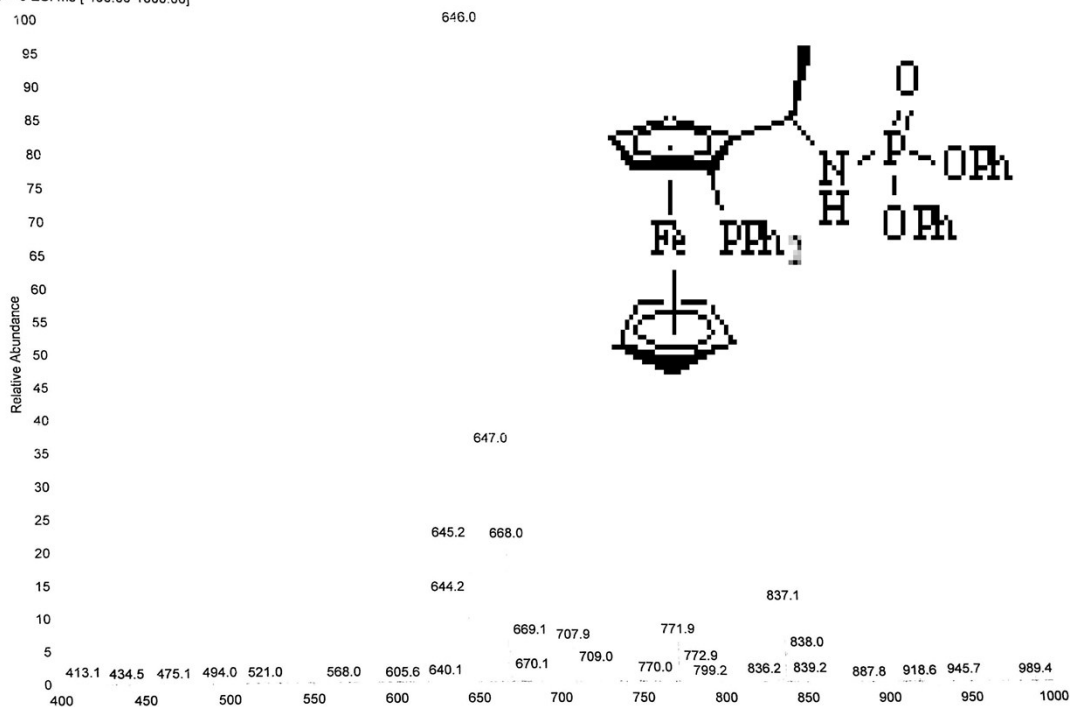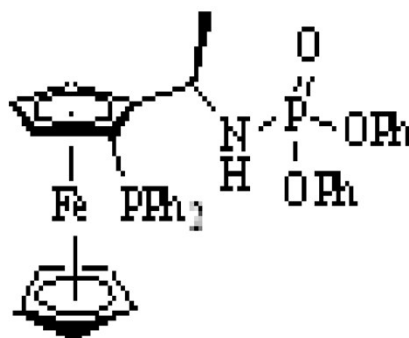

### Mass Spectrum SmartFormula Report

**Analysis Info**

Analysis Name D:\Data\2015\03.29\20140903HHW.d  
Method tune\_POS\_low.m  
Sample Name 20140903HHW  
Comment

Acquisition Date 3/29/2015 12:18:11 PM

Operator bruker  
Instrument / Ser# micrOTOF-Q II 10366

**Acquisition Parameter**

|             |            |                       |           |                  |           |
|-------------|------------|-----------------------|-----------|------------------|-----------|
| Source Type | ESI        | Ion Polarity          | Positive  | Set Nebulizer    | 0.4 Bar   |
| Focus       | Not active | Set Capillary         | 4500 V    | Set Dry Heater   | 180 °C    |
| Scan Begin  | 50 m/z     | Set End Plate Offset  | -500 V    | Set Dry Gas      | 4.0 l/min |
| Scan End    | 1500 m/z   | Set Collision Cell RF | 150.0 Vpp | Set Divert Valve | Waste     |

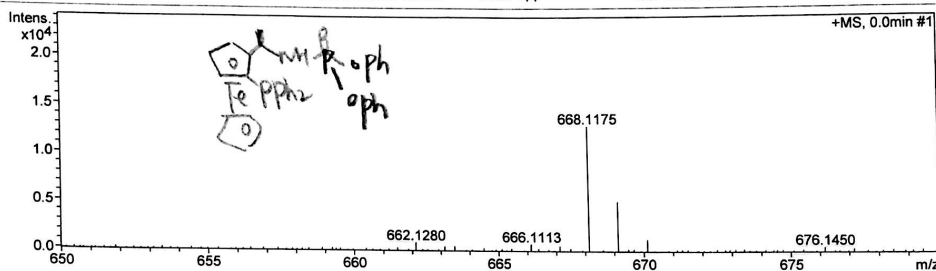

| Meas. m/z | Formula                   | m/z      | err [ppm] | mSigma |
|-----------|---------------------------|----------|-----------|--------|
| 668.1175  | C 36 H 33 Fe N Na O 3 P 2 | 668.1178 | 0.5       | 11.7   |

C:\Data\2014\201408\20140813HHW

08/28/2014 04:38:29 PM

20140813HHW

胡海文

20140813HHW #22 RT: 0.65 AV: 1 NL: 2.87E8  
T: +c ESI Full ms [ 50.00-1200.00]

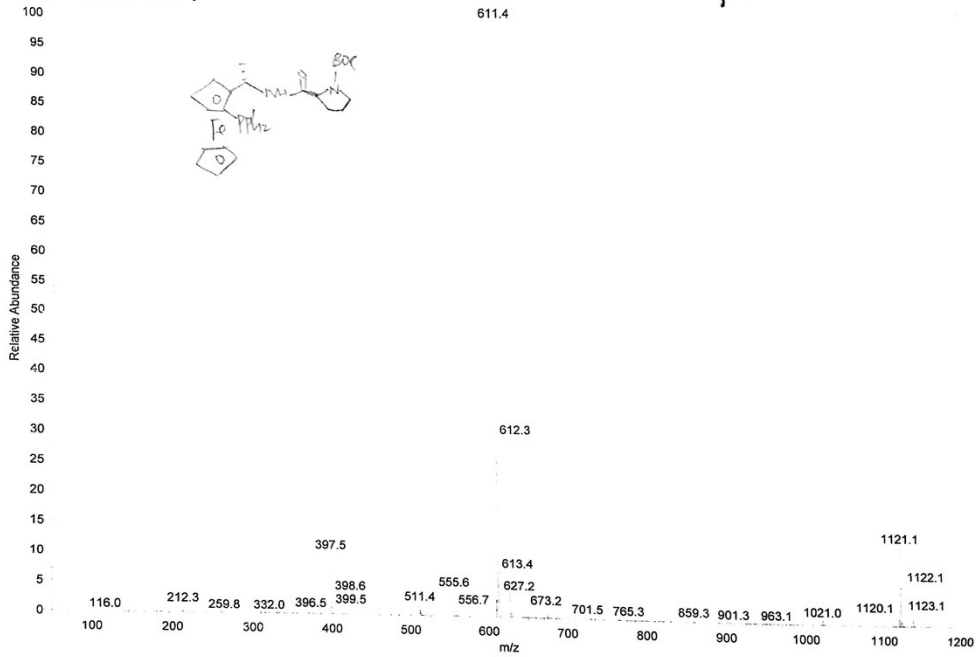

### Mass Spectrum SmartFormula Report

胡海文

#### Analysis Info

Analysis Name D:\Data\2014\11.13\20141111HHW.d  
 Method tune\_POS\_low.m  
 Sample Name ZJB20141031-2  
 Comment

Acquisition Date 11/27/2014 3:32:10 PM

Operator bruker  
 Instrument / Ser# micrOTOF-Q II 10366

#### Acquisition Parameter

|             |            |                       |           |                  |           |
|-------------|------------|-----------------------|-----------|------------------|-----------|
| Source Type | ESI        | Ion Polarity          | Positive  | Set Nebulizer    | 0.4 Bar   |
| Focus       | Not active | Set Capillary         | 4500 V    | Set Dry Heater   | 180 °C    |
| Scan Begin  | 50 m/z     | Set End Plate Offset  | -500 V    | Set Dry Gas      | 4.0 l/min |
| Scan End    | 1500 m/z   | Set Collision Cell RF | 150.0 Vpp | Set Divert Valve | Waste     |

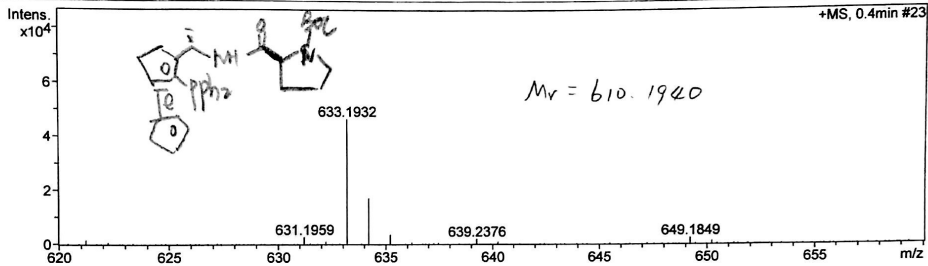

| Meas. m/z | Formula                   | m/z      | err [ppm] | mSigma |
|-----------|---------------------------|----------|-----------|--------|
| 633.1932  | C 34 H 39 Fe N 2 Na O 3 P | 633.1940 | 1.3       | 14.9   |

胡海文

20141216-1HHW\_141223101433 #5 RT: 0.13 AV: 1 NL: 1.24E6  
T: +c ESI ms [50.00-1000.00]

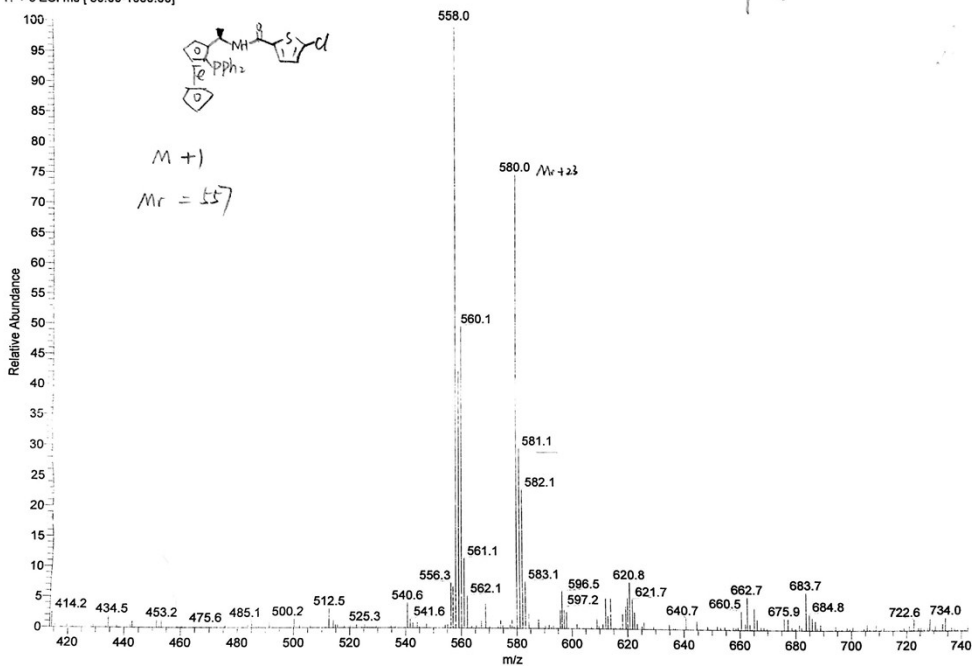

### Mass Spectrum SmartFormula Report

胡海文

**Analysis Info**

Analysis Name D:\Data\2015\1.23\20141222-2HHW..d  
Method tune\_POS\_low.m  
Sample Name 20141222-2HHW.  
Comment

Acquisition Date 1/22/2015 3:13:26 PM

Operator bruker  
Instrument / Ser# micrOTOF-Q II 10366

**Acquisition Parameter**

|             |            |                       |           |                  |           |
|-------------|------------|-----------------------|-----------|------------------|-----------|
| Source Type | ESI        | Ion Polarity          | Positive  | Set Nebulizer    | 0.4 Bar   |
| Focus       | Not active | Set Capillary         | 4500 V    | Set Dry Heater   | 180 °C    |
| Scan Begin  | 50 m/z     | Set End Plate Offset  | -500 V    | Set Dry Gas      | 4.0 l/min |
| Scan End    | 1500 m/z   | Set Collision Cell RF | 150.0 Vpp | Set Divert Valve | Waste     |

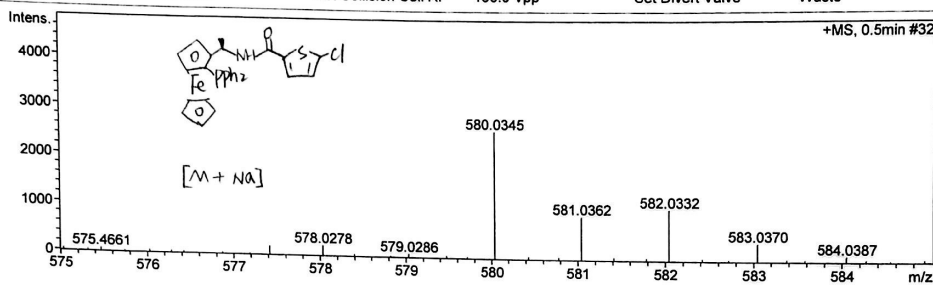

| Meas. m/z | Formula                    | m/z      | err [ppm] | mSigma |
|-----------|----------------------------|----------|-----------|--------|
| 580.0345  | C 29 H 25 Cl Fe N Na O P S | 580.0325 | -3.5      | 10.2   |

20141229HHW #31-56 RT: 0.80-1.44 AV: 26 NL: 1.60E6  
T: +c ESI Full ms [ 175.00-1000.00]

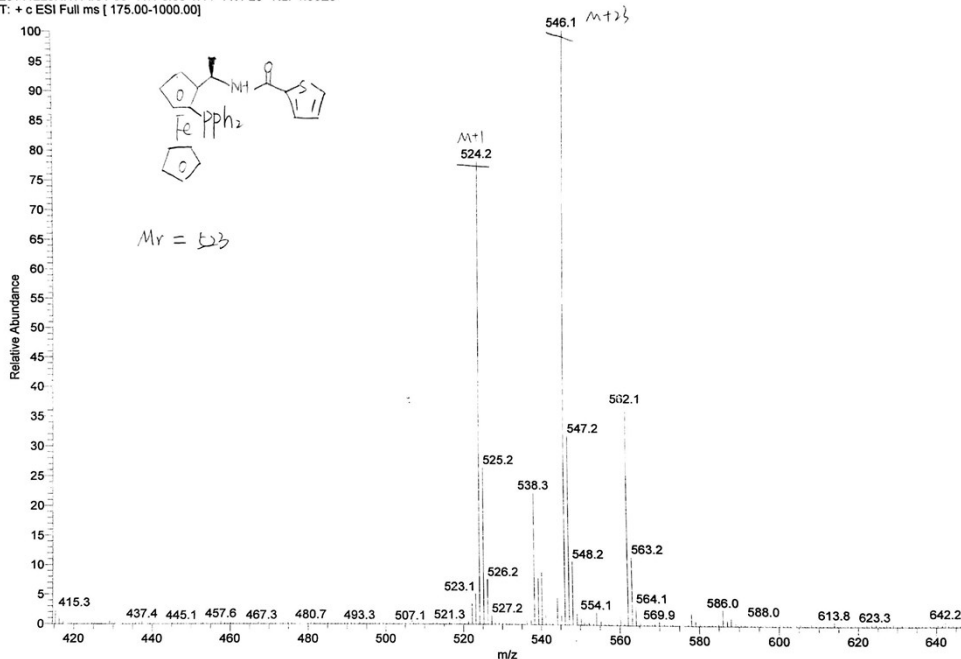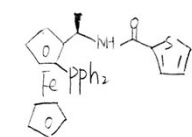

Mr = 523

### Mass Spectrum SmartFormula Report

**Analysis Info**

Analysis Name D:\Data\2015\03.29\20141229HHW.d  
Method tune\_POS\_low.m  
Sample Name 20141229HHW  
Comment

Acquisition Date 3/29/2015 12:31:09 PM

Operator bruker  
Instrument / Ser# micrOTOF-Q II 10366

**Acquisition Parameter**

|             |            |                       |           |                  |           |
|-------------|------------|-----------------------|-----------|------------------|-----------|
| Source Type | ESI        | Ion Polarity          | Positive  | Set Nebulizer    | 0.4 Bar   |
| Focus       | Not active | Set Capillary         | 4500 V    | Set Dry Heater   | 180 °C    |
| Scan Begin  | 50 m/z     | Set End Plate Offset  | -500 V    | Set Dry Gas      | 4.0 l/min |
| Scan End    | 1500 m/z   | Set Collision Cell RF | 150.0 Vpp | Set Divert Valve | Waste     |

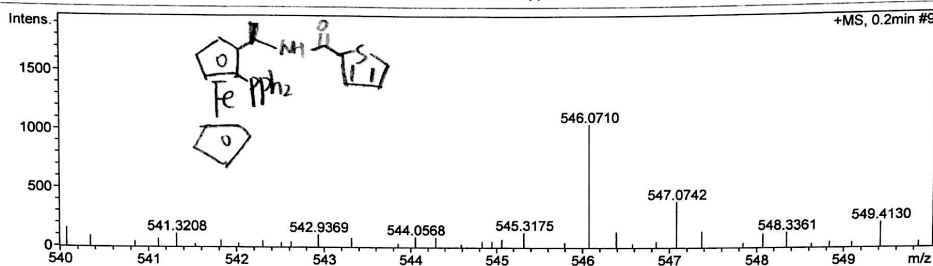

| Meas. m/z | Formula                 | m/z      | err [ppm] | mSigma |
|-----------|-------------------------|----------|-----------|--------|
| 546.0710  | C 29 H 26 Fe N Na O P S | 546.0714 | 0.7       | 22.3   |

20141117-1HHW #1-3 RT: 0.00-0.05 AV: 3 NL: 1.35E7  
 T: + c ESI ms [ 50.00-1000.00]

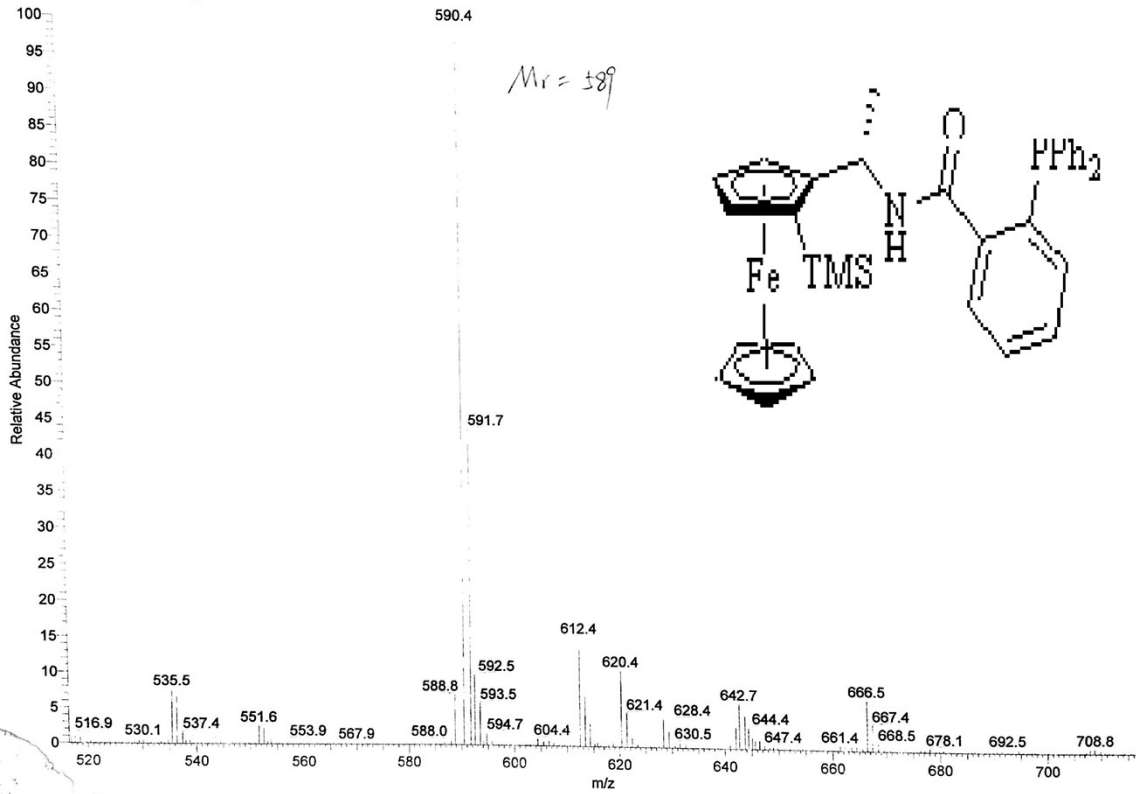

### Mass Spectrum SmartFormula Report

**Analysis Info**

Analysis Name D:\Data\2015\03.29\20141117-1-HHW.d  
 Method tune\_POS\_low.m  
 Sample Name 20141117-1-HHW  
 Comment

Acquisition Date 3/29/2015 12:53:29 PM

Operator bruker  
 Instrument / Ser# micrOTOF-Q II 10366

**Acquisition Parameter**

|             |            |                       |           |                  |           |
|-------------|------------|-----------------------|-----------|------------------|-----------|
| Source Type | ESI        | Ion Polarity          | Positive  | Set Nebulizer    | 0.4 Bar   |
| Focus       | Not active | Set Capillary         | 4500 V    | Set Dry Heater   | 180 °C    |
| Scan Begin  | 50 m/z     | Set End Plate Offset  | -500 V    | Set Dry Gas      | 4.0 l/min |
| Scan End    | 1500 m/z   | Set Collision Cell RF | 150.0 Vpp | Set Divert Valve | Waste     |

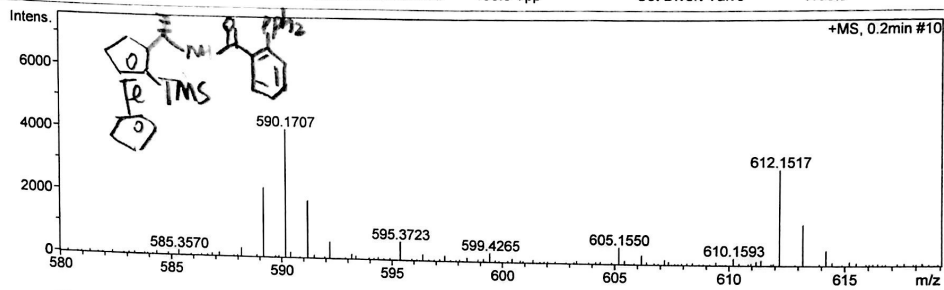

| Meas. m/z | Formula                                                                                          | m/z      | err [ppm] | mSigma |
|-----------|--------------------------------------------------------------------------------------------------|----------|-----------|--------|
| 612.1517  | C <sub>34</sub> H <sub>36</sub> FeN <sub>1</sub> Na <sub>1</sub> OP <sub>2</sub> Si <sub>1</sub> | 612.1546 | 4.7       | 16.5   |

## Mass Spectrum SmartFormula Report

|                      |                                    |                   |                       |  |
|----------------------|------------------------------------|-------------------|-----------------------|--|
| <b>Analysis Info</b> |                                    | Acquisition Date  | 12/27/2013 2:39:01 PM |  |
| Analysis Name        | D:\Data\2013\12.27\20131221-2TAP.d | Operator          | bruker                |  |
| Method               | tune_POS_low.m                     | Instrument / Ser# | micrOTOF-Q II 10366   |  |
| Sample Name          | 20131221-2TAP                      |                   |                       |  |
| Comment              |                                    |                   |                       |  |

### Acquisition Parameter

|             |            |                       |           |                  |           |
|-------------|------------|-----------------------|-----------|------------------|-----------|
| Source Type | ESI        | Ion Polarity          | Positive  | Set Nebulizer    | 0.4 Bar   |
| Focus       | Not active | Set Capillary         | 4500 V    | Set Dry Heater   | 180 °C    |
| Scan Begin  | 50 m/z     | Set End Plate Offset  | -500 V    | Set Dry Gas      | 4.0 l/min |
| Scan End    | 1500 m/z   | Set Collision Cell RF | 150.0 Vpp | Set Divert Valve | Waste     |

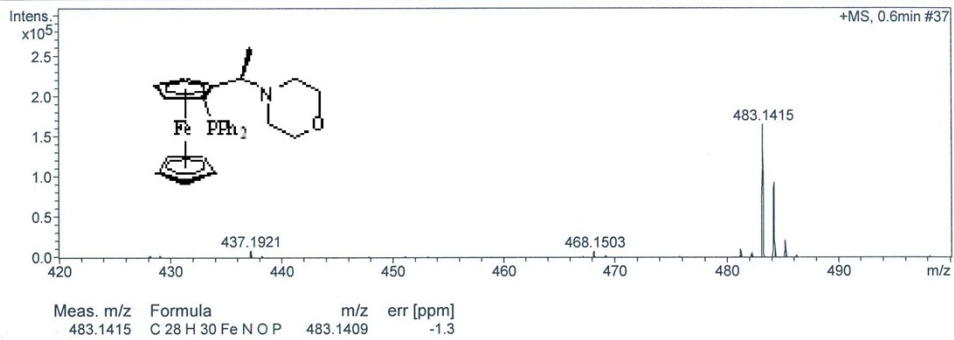

E:\Data\2013\20130227tap 03/18/2013 12:56:09 PM 20130227tap

20130227tap #1 RT: 0.01 AV: 1 NL: 5.48E6  
T: -c ESI ms [ 50.00-1200.00]

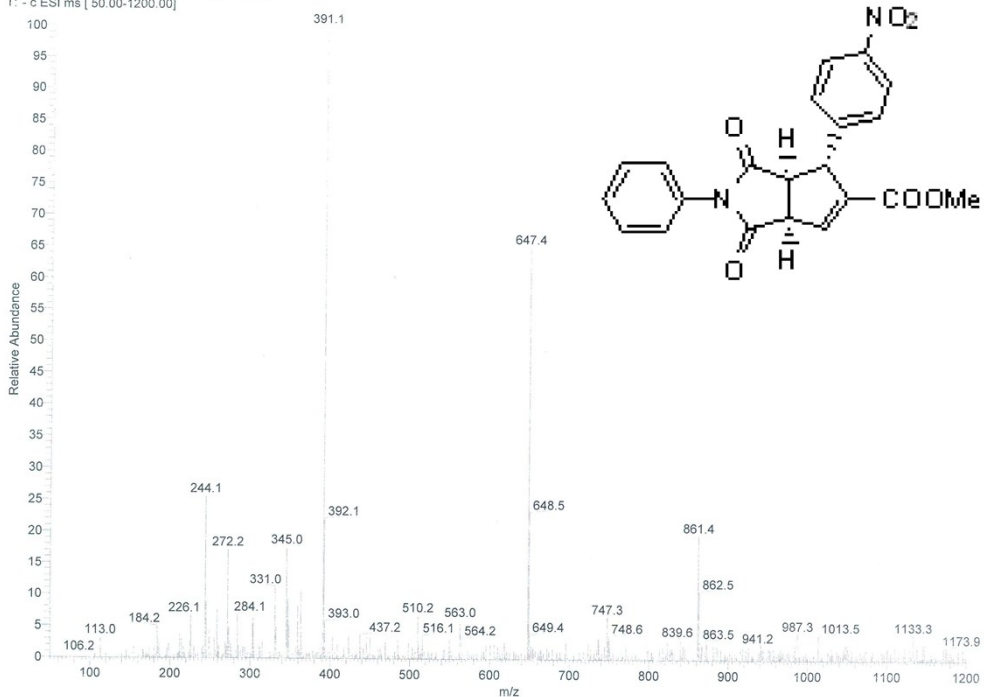

E:\Data\2013\201312\20131218-1TAP 12/28/2013 09:02:36 AM 20131218-1TAP

20131218-1TAP #43 RT: 1.15 AV: 1 NL: 1.67E8  
T: - c ESI Full ms [ 50.00-1000.00]

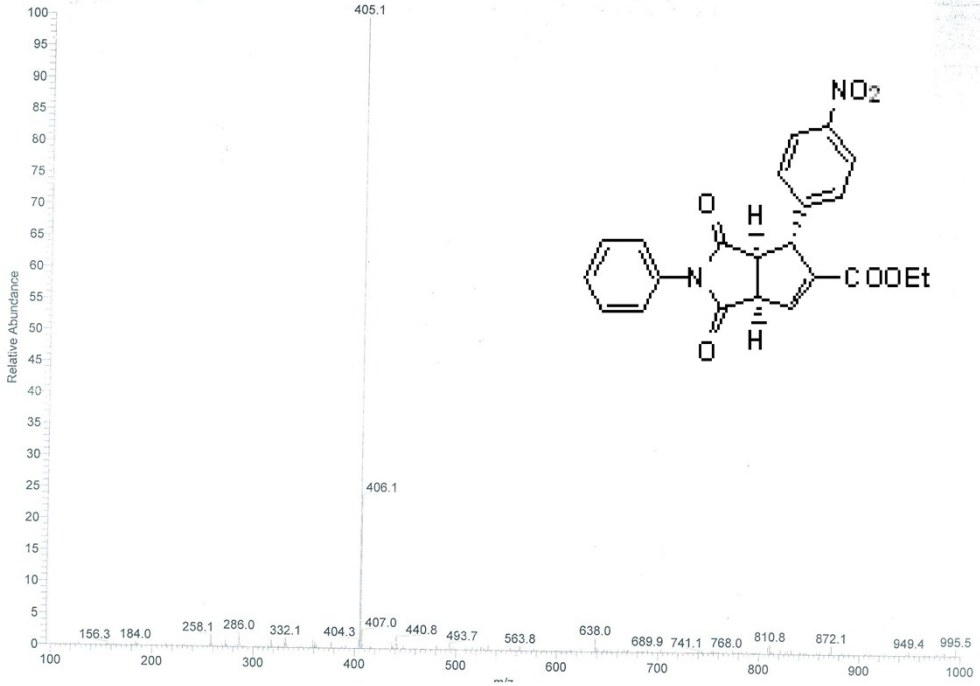

E:\Data\2014\201401\20140107-TAP 01/18/2014 09:31:55 AM 20140107-TAP

20140107-TAP #49 RT: 1.26 AV: 1 NL: 7.32E7  
T: - c ESI ms [ 50.00-1000.00]

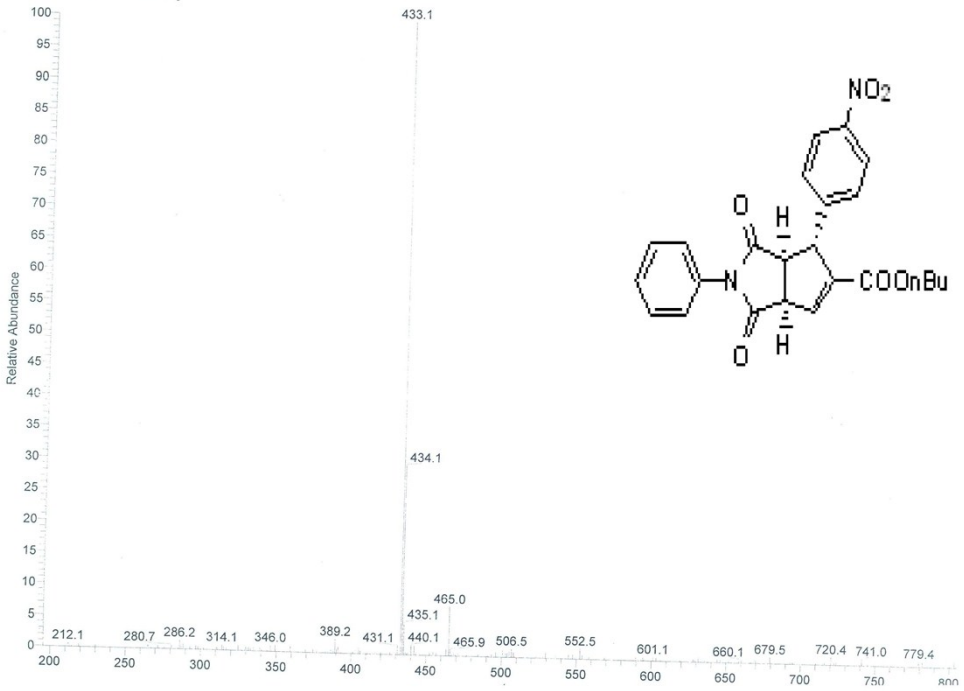



E:\Data\2014\201401\20131224-1TAP

01/07/2014 09:56:01 AM

20131224-1TAP

20131224-1TAP #112 RT: 2.19 AV: 1 NL: 1.56E7  
T: -c ESI Full ms [ 50.00-400.00]

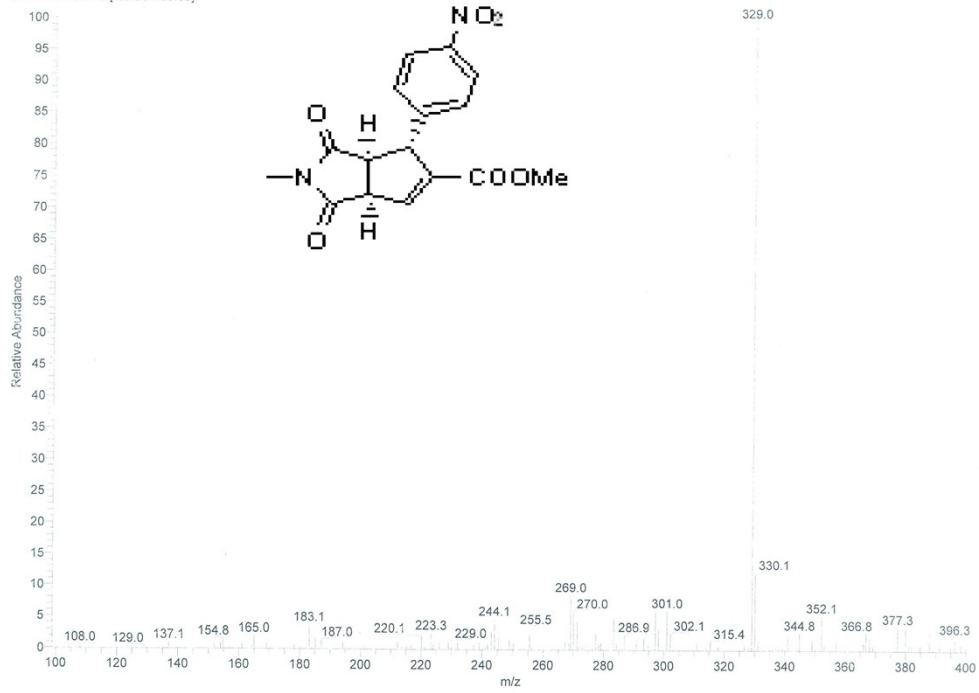

E:\Data\2013\201312\20131213-1TAP

12/26/2013 09:34:25 AM

20131213-1TAP

20131213-1TAP #58 RT: 1.54 AV: 1 NL: 2.84E7  
T: -c ESI Full ms [ 50.00-1000.00]

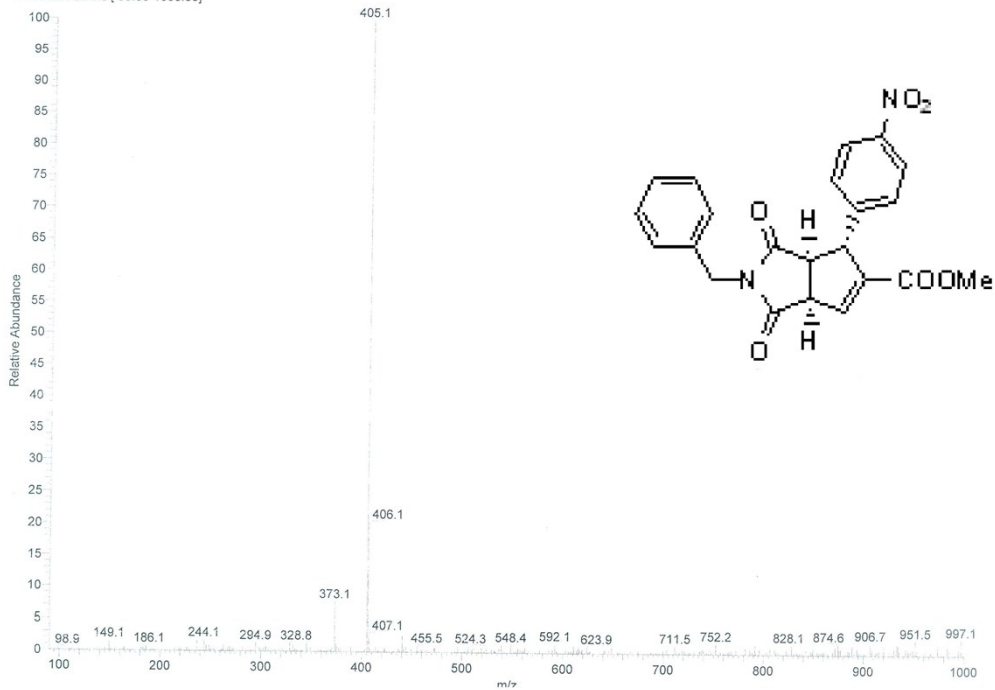

E:\Data\2014\201401\20131226-1TAP

01/07/2014 10:05:49 AM

20131226-1TAP

20131226-1TAP #54-65 RT: 1.36-1.39 AV: 2 NL: 1.14E7  
T: - c ESI Full ms [ 50.00-1000.00]

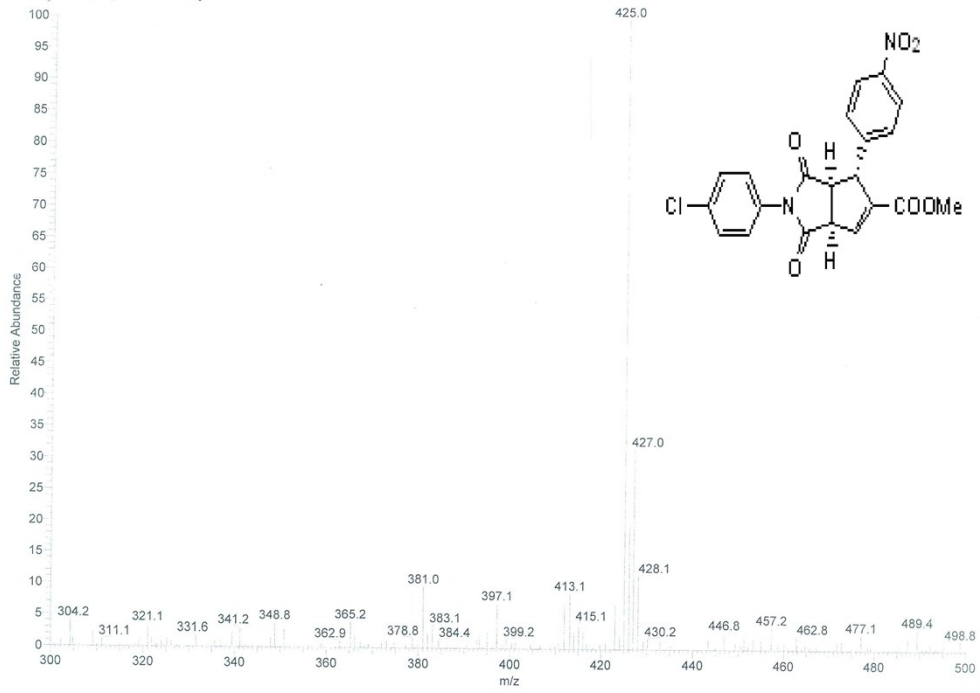

E:\Data\2014\201402\20140116-2TAP

02/19/2014 02:35:01 PM

20140116-2TAP

20140116-2TAP #84 RT: 1.82 AV: 1 NL: 8.72E7  
T: - c ESI Full ms [ 50.00-1000.00]

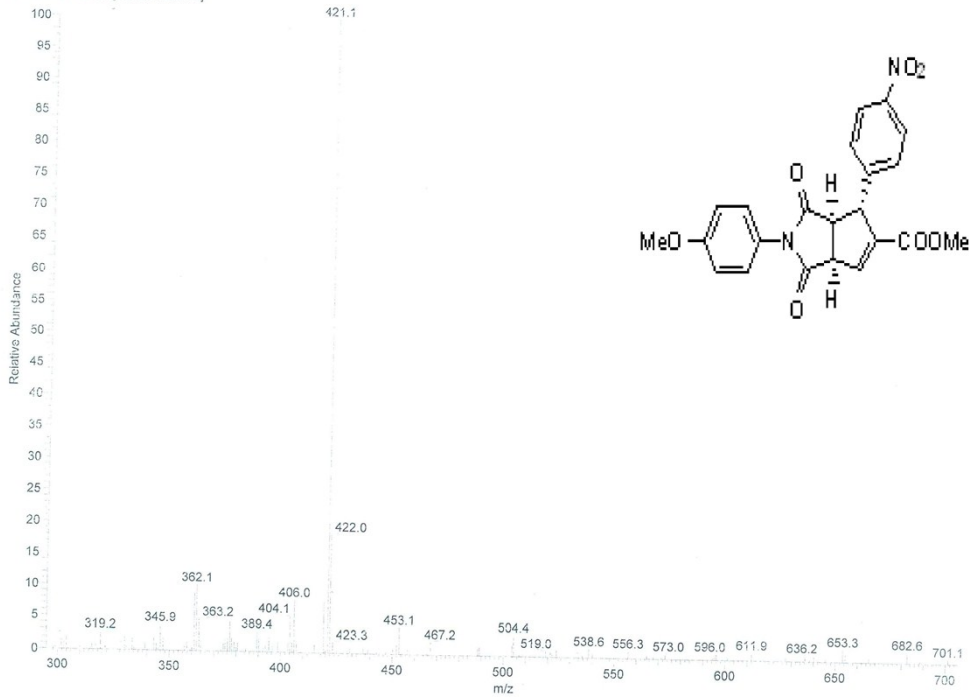

20150528HHW #23 RT: 0.61 AV: 1 NL: 3.98E5  
T: - c ESI Full ms [ 50.00-1000.00]

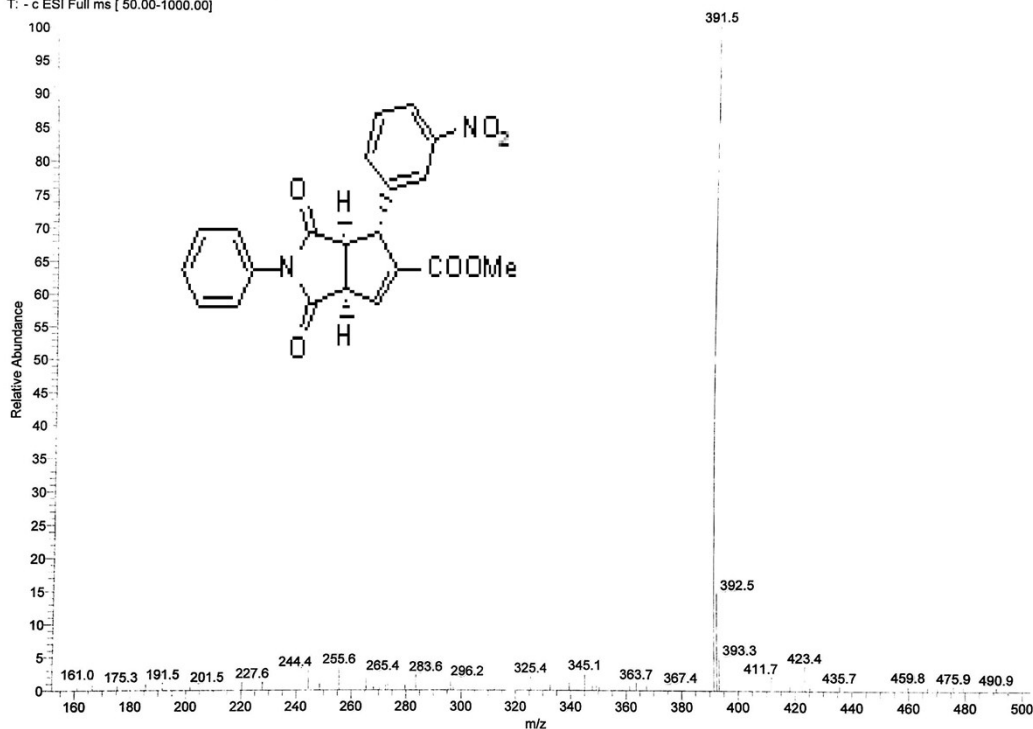

## Mass Spectrum SmartFormula Report

### Analysis Info

Analysis Name D:\Data\2015\05.29\20150528HHW..d  
Method tune\_POS\_low.m  
Sample Name 20150528HHW.  
Comment

Acquisition Date 5/29/2015 1:57:38 PM

Operator bruker  
Instrument / Ser# micrOTOF-Q II 10366

### Acquisition Parameter

|             |            |                       |           |                  |           |
|-------------|------------|-----------------------|-----------|------------------|-----------|
| Source Type | ESI        | Ion Polarity          | Positive  | Set Nebulizer    | 0.4 Bar   |
| Focus       | Not active | Set Capillary         | 4500 V    | Set Dry Heater   | 180 °C    |
| Scan Begin  | 50 m/z     | Set End Plate Offset  | -500 V    | Set Dry Gas      | 4.0 l/min |
| Scan End    | 1500 m/z   | Set Collision Cell RF | 150.0 Vpp | Set Divert Valve | Waste     |

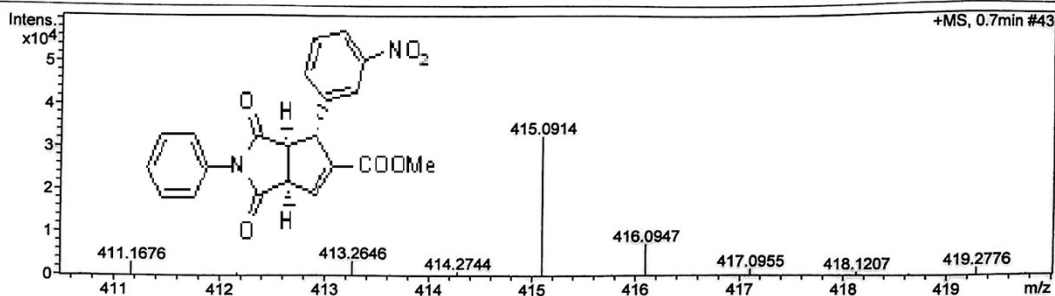

| Meas. m/z | Formula              | m/z      | err [ppm] | mSigma |
|-----------|----------------------|----------|-----------|--------|
| 415.0914  | C 21 H 16 N 2 Na O 6 | 415.0901 | -3.2      | 8.0    |

20130822-1TAP #37 RT: 0.59 AV: 1 NL: 1.09E7  
T: + c ESI Full ms [ 200.00-400.00]

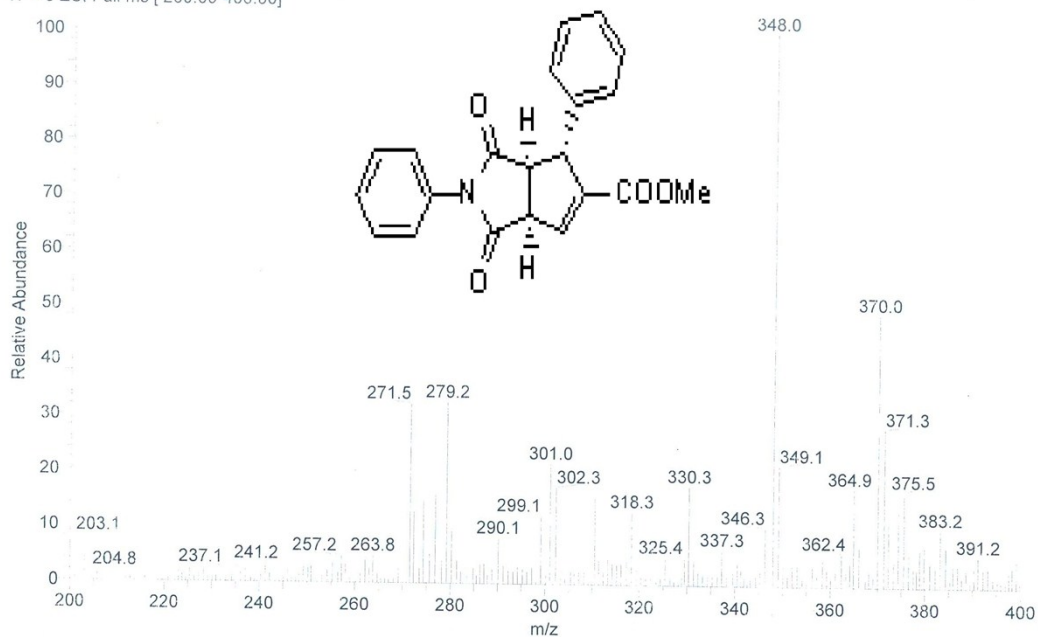

20130822-1TAP #13 RT: 0.26 AV: 1 NL: 1.23E5  
T: - c ESI Full ms [ 200.00-400.00]

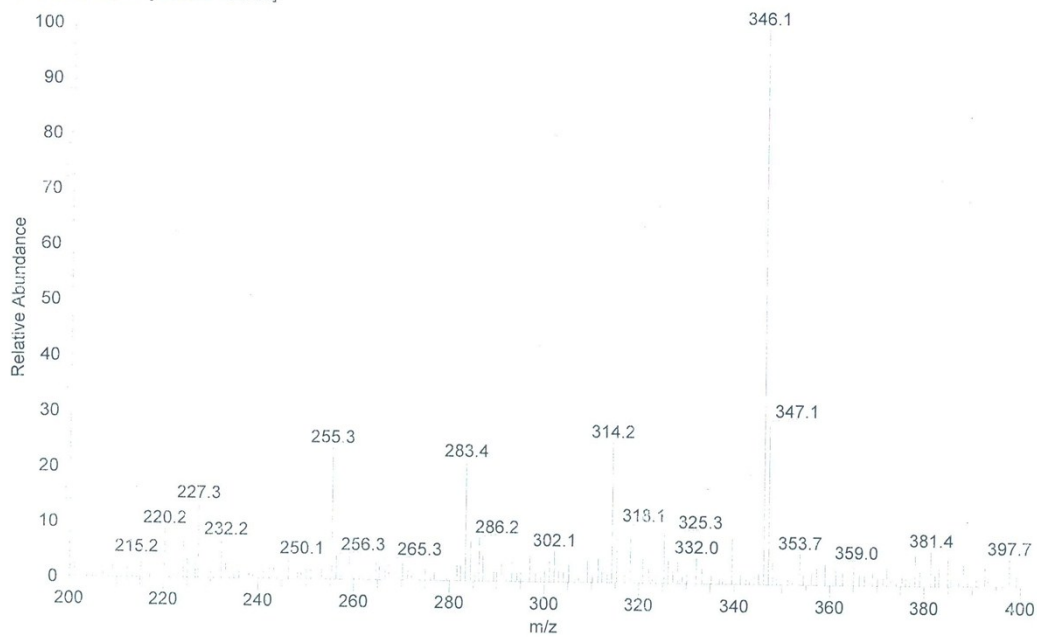

20130822-2TAP #24 RT: 0.54 AV: 1 NL: 1.34E7  
T: - c ESI Full ms [ 50.00-600.00]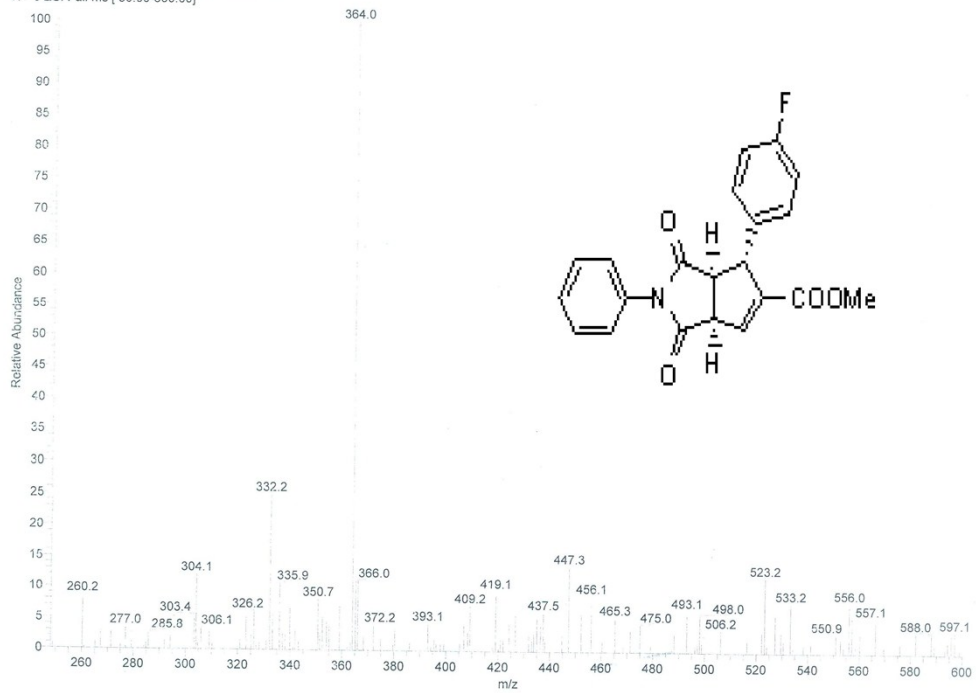20140224-2TAP #156 RT: 2.76 AV: 1 NL: 1.47E6  
T: + c ESI Full ms [ 50.00-500.00]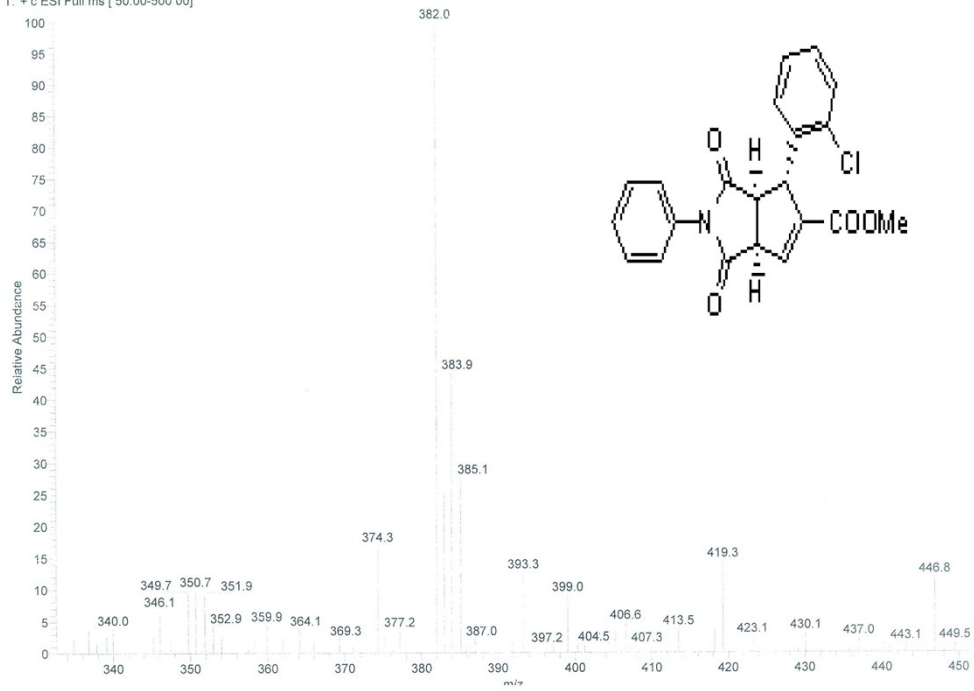

E:\Data\2014\201401\20130912-1TAP

01/07/2014 09:48:24 AM

20130912-1TAP

20130912-1TAP #70 RT: 1.31 AV: 1 NL: 1.56E7  
T: - c ESI Full ms [ 50.00-500.00]

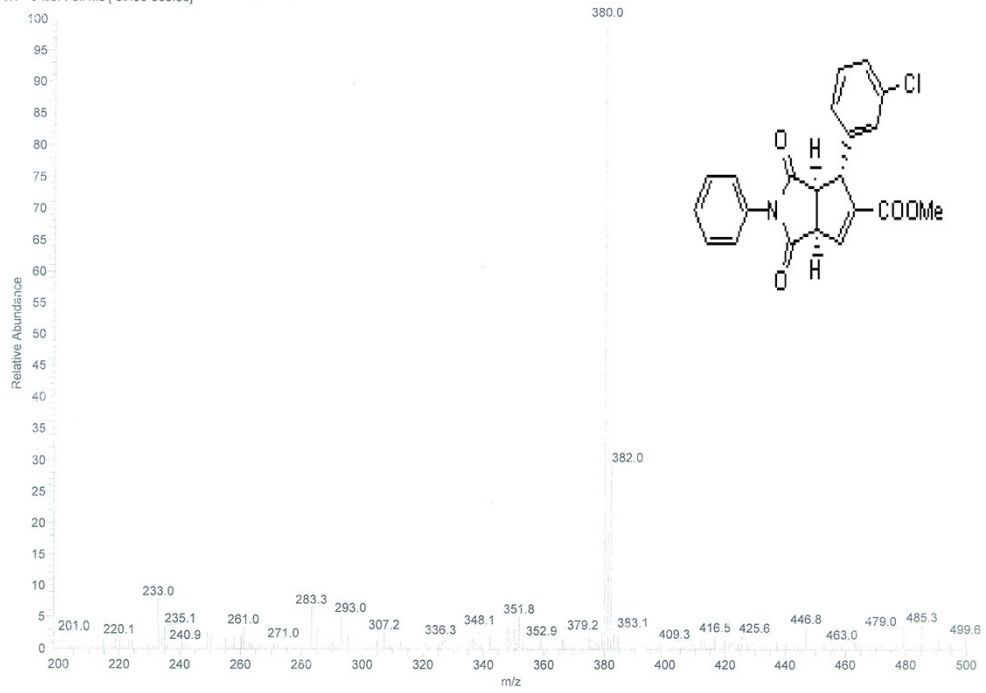

E:\Data\2014\20130829-1TAP

09/02/2013 03:55:52 PM

20130829-1TAP

20130829-1TAP #43 RT: 1.20 AV: 1 SB: 77 1.01-2.05, 0.98-2.05 NL: 7.70E5  
T: - c ESI ms [ 50.00-1000.00]

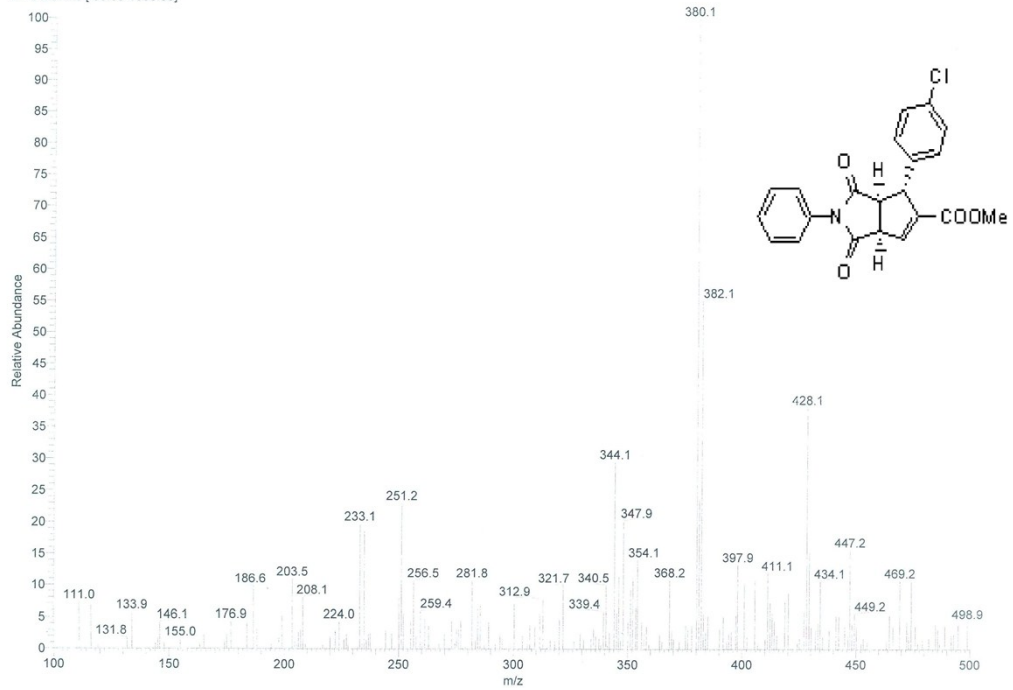

E:\Data\2013\20130824-1TAP

09/02/2013 08:55:35 AM

20130824-1TAP

20130824-1TAP #25 RT: 0.71 AV: 1 NL: 1.48E5  
T: - c ESI ms [50.00-1000.00]

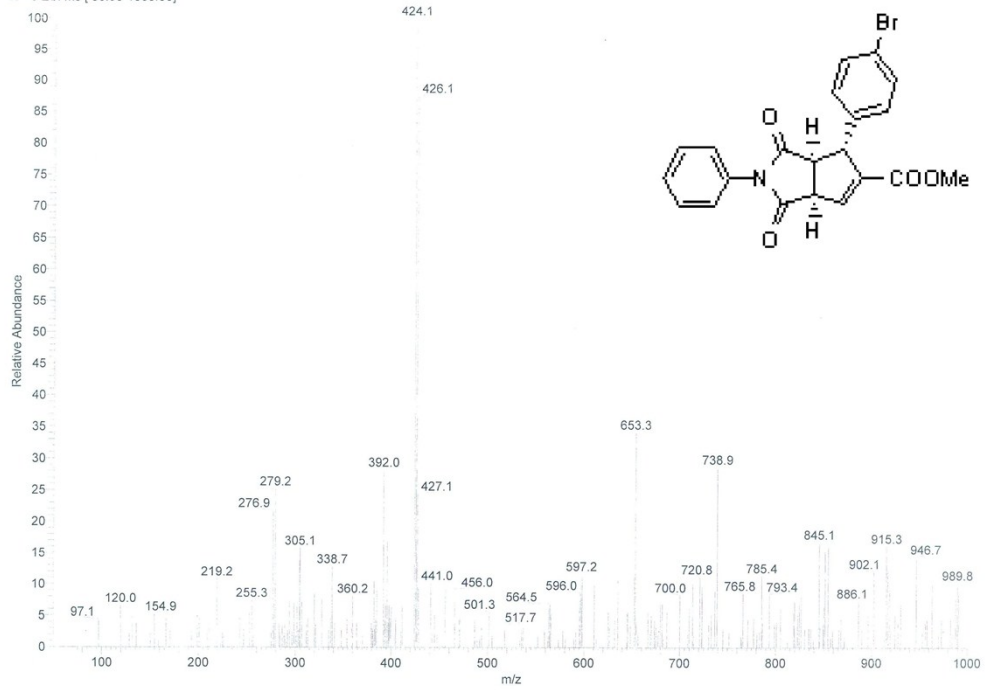

E:\Data\2013\20130824-2TAP

09/02/2013 09:11:39 AM

20130824-2TAP

20130824-2TAP #103 RT: 2.05 AV: 1 NL: 5.42E6  
T: - c ESI Full ms [50.00-1000.00]

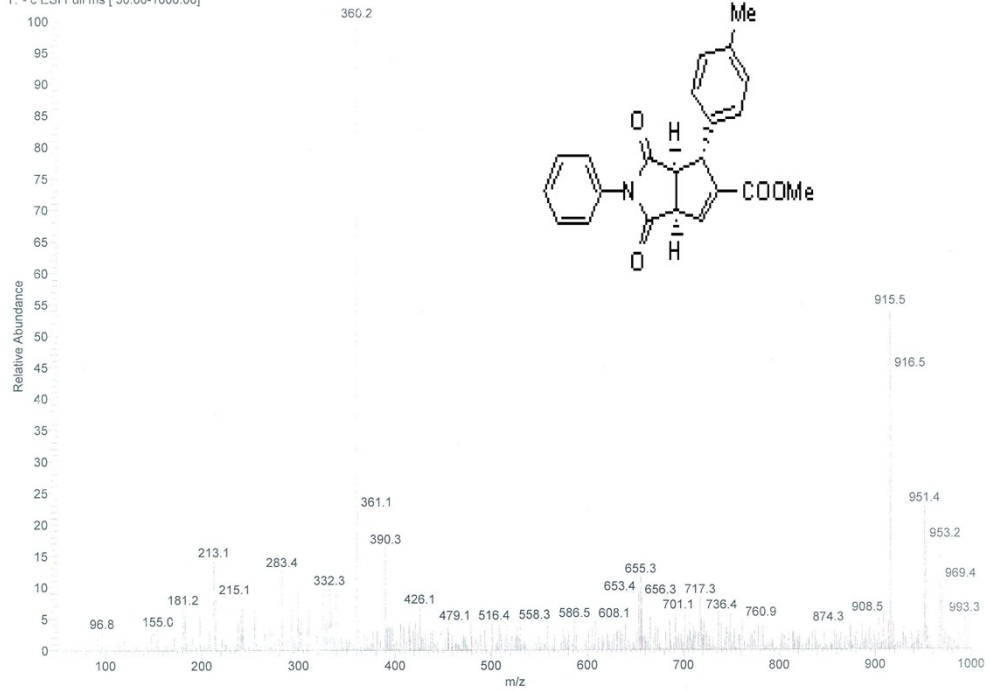

E:\Data\2014\201404\20140312-1tap

04/04/2014 12:19:42 PM

20140312-1tap

20140312-1tap #68 RT: 1.38 AV: 1 NL: 7.52E5  
T: + c ESI Full ms [ 100.00-600.00]

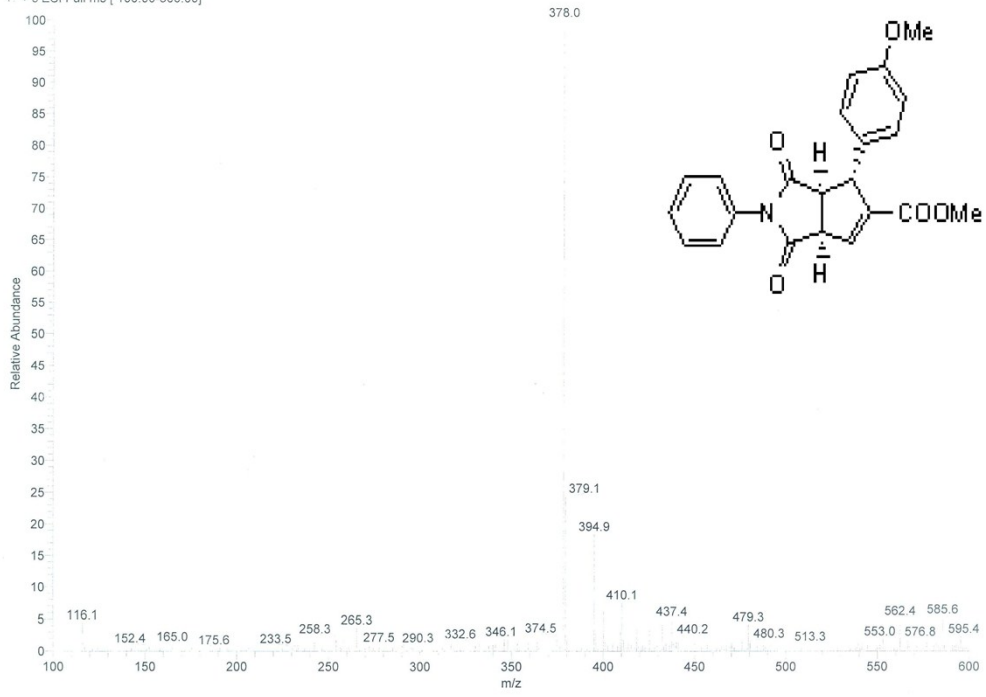

E:\Data\2014\20140307-1TAP\_140317092201

03/17/2014 09:22:01 AM

20140307-1TAP

20140307-1TAP\_140317092201 #108 RT: 1.82 AV: 1 NL: 5.65E6  
T: - c ESI Full ms [ 50.00-500.00]

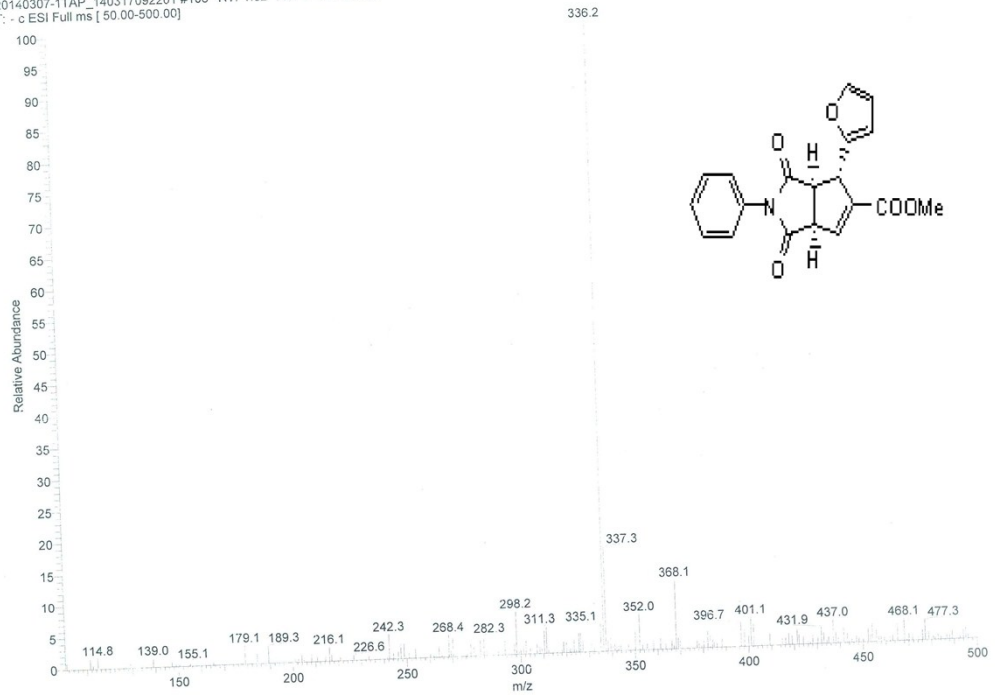



20150318-1HHW #6 RT: 0.13 AV: 1 NL: 2.34E5  
T: + c ESI Full ms [50.00-800.00]

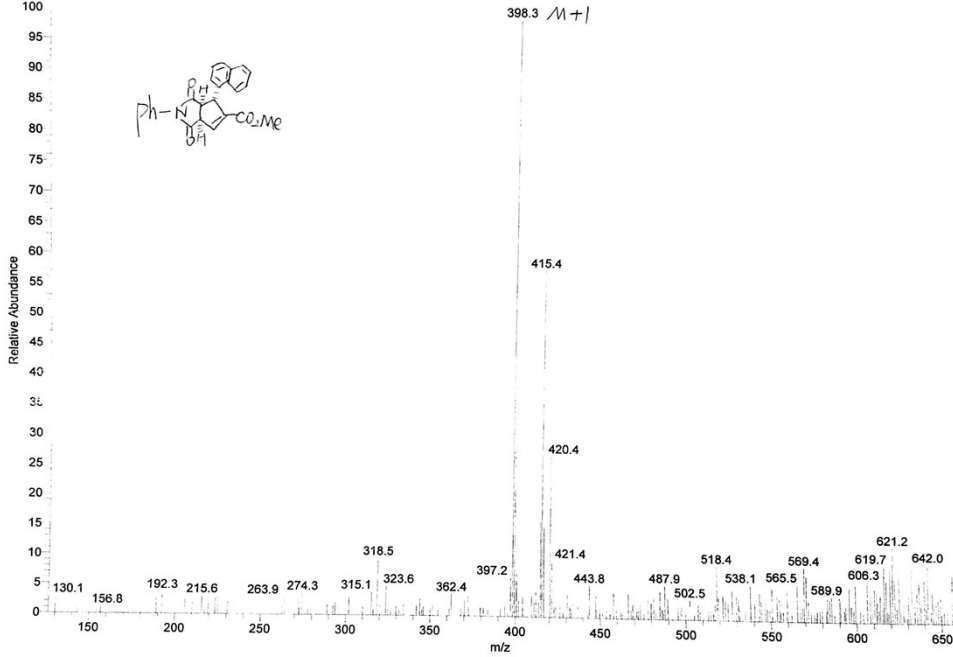

### Mass Spectrum SmartFormula Report

**Analysis Info**

Analysis Name D:\Data\2015\5.14\20150318-2HHW.d  
Method tune\_POS\_low.m  
Sample Name 20150318-2HHW  
Comment

Acquisition Date 5/15/2015 9:52:09 AM

Operator bruker  
Instrument / Ser# micrOTOF-Q II 10366

**Acquisition Parameter**

|             |            |                       |           |                  |           |
|-------------|------------|-----------------------|-----------|------------------|-----------|
| Source Type | ESI        | Ion Polarity          | Positive  | Set Nebulizer    | 0.4 Bar   |
| Focus       | Not active | Set Capillary         | 4500 V    | Set Dry Heater   | 180 °C    |
| Scan Begin  | 50 m/z     | Set End Plate Offset  | -500 V    | Set Dry Gas      | 4.0 l/min |
| Scan End    | 1500 m/z   | Set Collision Cell RF | 150.0 Vpp | Set Divert Valve | Waste     |

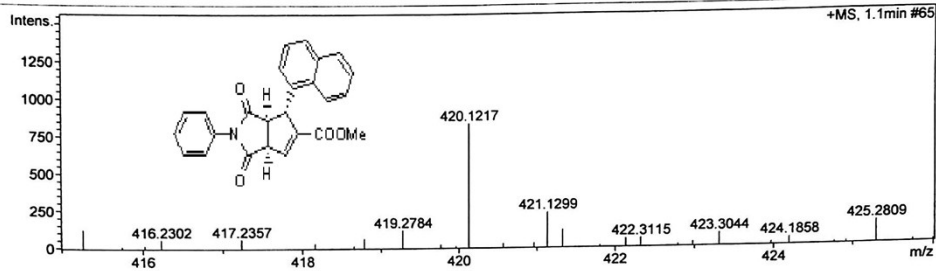

| Meas. m/z | Formula            | m/z      | err [ppm] | mSigma |
|-----------|--------------------|----------|-----------|--------|
| 420.1217  | C 25 H 19 N Na O 4 | 420.1206 | -2.5      | 11.8   |

20150418-3HHW #36 RT: 0.99 AV: 1 NL: 2.61E6  
T: + c ESI ms [ 50.00-1000.00]

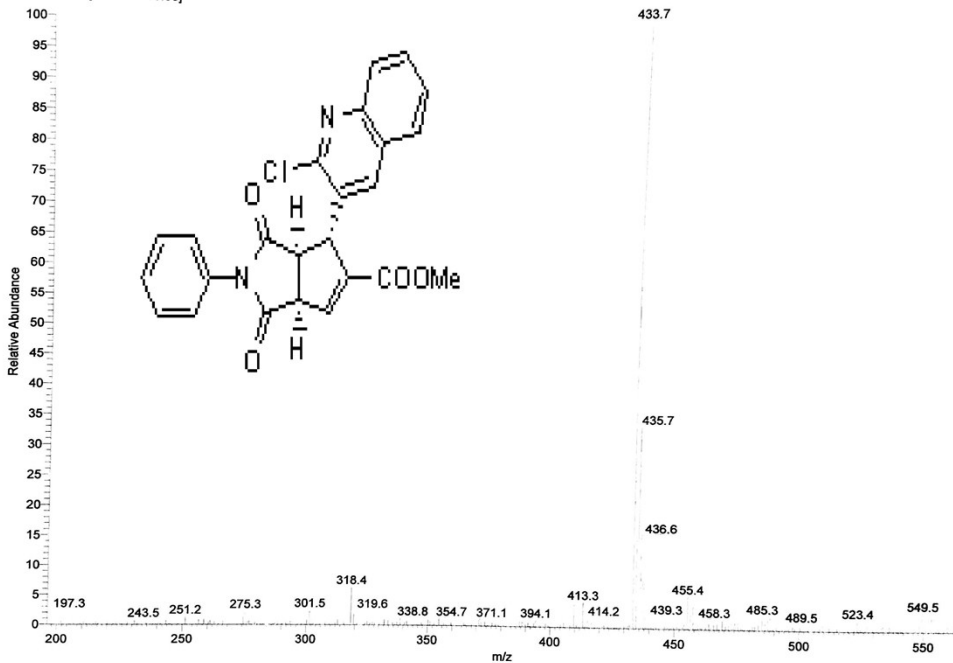

### Mass Spectrum SmartFormula Report

**Analysis Info**

Analysis Name D:\Data\2015\5.9\20150418-3HHW.d  
Method tune\_POS\_low.m  
Sample Name 20150418-3HHW  
Comment

Acquisition Date 5/9/2015 3:04:48 PM

Operator bruker  
Instrument / Ser# micrOTOF-Q II 10366

**Acquisition Parameter**

|             |            |                       |           |                  |           |
|-------------|------------|-----------------------|-----------|------------------|-----------|
| Source Type | ESI        | Ion Polarity          | Positive  | Set Nebulizer    | 0.4 Bar   |
| Focus       | Not active | Set Capillary         | 4500 V    | Set Dry Heater   | 180 °C    |
| Scan Begin  | 50 m/z     | Set End Plate Offset  | -500 V    | Set Dry Gas      | 4.0 l/min |
| Scan End    | 1500 m/z   | Set Collision Cell RF | 150.0 Vpp | Set Divert Valve | Waste     |

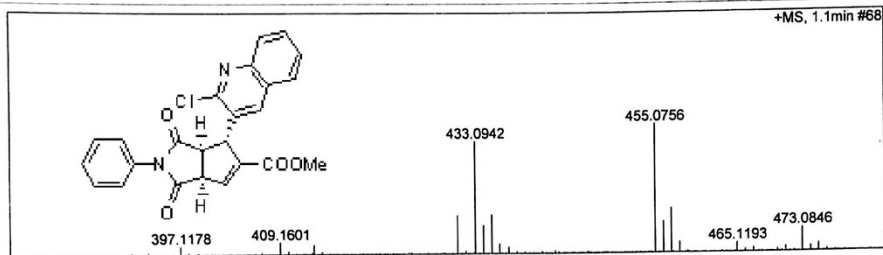

| Meas. m/z | Formula                                                         | m/z      | err [ppm] | mSigma |
|-----------|-----------------------------------------------------------------|----------|-----------|--------|
| 433.0942  | C <sub>24</sub> H <sub>18</sub> ClN <sub>2</sub> O <sub>4</sub> | 433.0950 | 1.9       | 12.2   |

20150508HHW #52-56 RT: 1.42-1.52 AV: 5 NL: 2.22E5  
T: +c ESI Full ms [ 50.00-800.00]

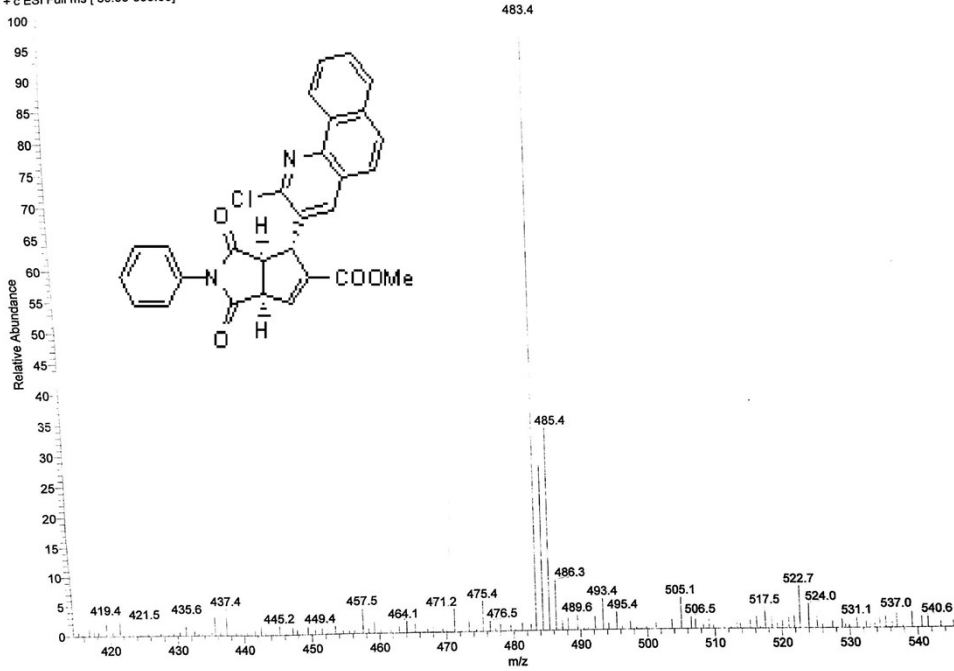

### Mass Spectrum SmartFormula Report

**Analysis Info**

Analysis Name D:\Data\2015\5.22\20150508HHW.d  
Method tune\_POS\_low.m  
Sample Name 20150508HHW.  
Comment

Acquisition Date 5/22/2015 9:53:11 AM

Operator bruker  
Instrument / Ser# micrOTOF-Q II 10366

**Acquisition Parameter**

|             |            |                       |           |                  |           |
|-------------|------------|-----------------------|-----------|------------------|-----------|
| Source Type | ESI        | Ion Polarity          | Positive  | Set Nebulizer    | 0.4 Bar   |
| Focus       | Not active | Set Capillary         | 4500 V    | Set Dry Heater   | 180 °C    |
| Scan Begin  | 50 m/z     | Set End Plate Offset  | -500 V    | Set Dry Gas      | 4.0 l/min |
| Scan End    | 1500 m/z   | Set Collision Cell RF | 150.0 Vpp | Set Divert Valve | Waste     |

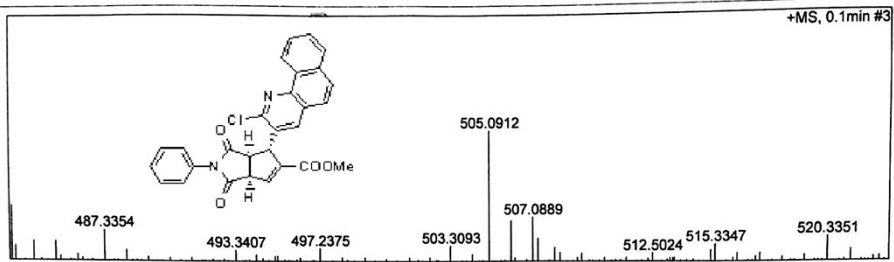

| Meas. m/z | Formula                 | m/z      | err [ppm] | mSigma |
|-----------|-------------------------|----------|-----------|--------|
| 505.0912  | C 28 H 19 Cl N 2 Na O 4 | 505.0926 | 2.8       | 16.1   |

E:\Data\2015\201505\20150420HHW

05/08/2015 02:51:20 PM

20150420HHW

20150420HHW #46 RT: 1.02 AV: 1 NL: 5.00E6  
T: + c ESI ms [50.00-700.00]

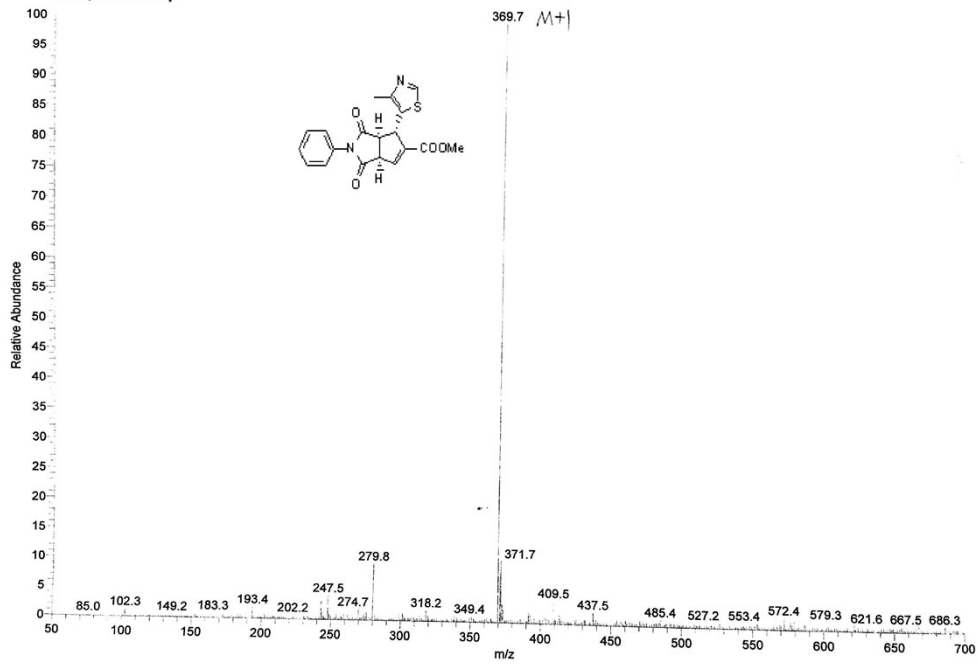

### Mass Spectrum SmartFormula Report

#### Analysis Info

Analysis Name D:\Data\2015\5.14\20150420HHW.d  
Method tune\_POS\_low.m  
Sample Name 20150420HHW  
Comment

Acquisition Date 5/15/2015 10:04:32 AM

Operator bruker  
Instrument / Ser# micrOTOF-Q II 10366

#### Acquisition Parameter

| Source Type | ESI        | Ion Polarity          | Positive  | Set Nebulizer    | 0.4 Bar   |
|-------------|------------|-----------------------|-----------|------------------|-----------|
| Focus       | Not active | Set Capillary         | 4500 V    | Set Dry Heater   | 180 °C    |
| Scan Begin  | 50 m/z     | Set End Plate Offset  | -500 V    | Set Dry Gas      | 4.0 l/min |
| Scan End    | 1500 m/z   | Set Collision Cell RF | 150.0 Vpp | Set Divert Valve | Waste     |

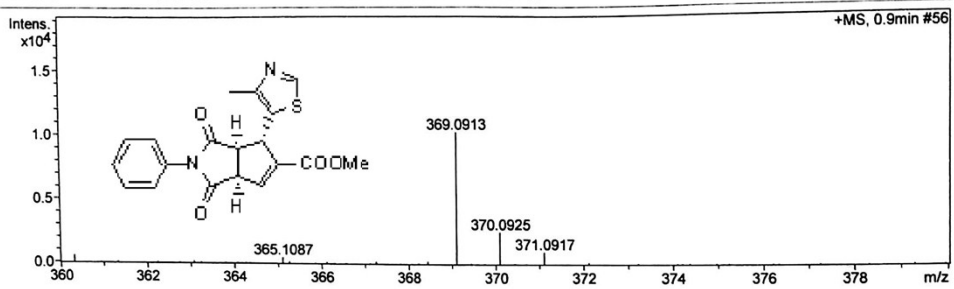

| Meas. m/z | Formula                                                         | m/z      | err [ppm] | mSigma |
|-----------|-----------------------------------------------------------------|----------|-----------|--------|
| 369.0913  | C <sub>19</sub> H <sub>17</sub> N <sub>2</sub> O <sub>4</sub> S | 369.0904 | -2.7      | 12.7   |
